# Supplementary material for: Diverse Lifestyles and Strategies of Plant Pathogenesis Encoded in the Genomes of Eighteen Dothideomycetes Fungi
Source: PLoS Pathog. 2012 Dec 6;8(12):e1003037. doi: 10.1371/journal.ppat.1003037 (PMC3516569; doi:10.1371/journal.ppat.1003037)
Supplement: Table S1 — Assembly and annotation statistics of the genomes of 18 Dothideomycetes described in this report. (XLS) [file ppat.1003037.s010.xls]

## Sheet: Sheet1
	Alternaria brassicicola	Baudoinia compniacensis	Cladosporium fulvum	Cochliobolus heterostrophus C4	Cochliobolus heterostrophus C5	Cochliobolus sativus	Dothistroma septosporum	Hysterium pulicare	Leptosphaeria maculans	Mycosphaerella fijiensis	Mycosphaerella graminicola	Mycosphaerella populicola	Mycosphaerella populorum	Pyrenophora teres f. teres	Pyrenophora tritici-repentis	Rhytidhysteron rufulum	Setosphaeria turcica	Stagonospora nodorum
Assembly statistics
Sequencing center	Washington State University	JGI	Wageningen University and Research Center, The Netherlands	JGI	JGI	JGI	JGI	Oregon State University	URGI-INRA /Genoscope, France	JGI	JGI	University of British Columbia, Canada	JGI	Curtin University, Australia	BROAD Institute	Oregon State University	JGI	BROAD Institute
Sequencing technology	Sanger	Sanger, 454, Illumina	454	Illumina	Sanger	Sanger, 454, Illumina	Sanger, 454, Illumina	Illumina	Sanger	Sanger	Sanger	454	454, Illumina	Illumina	Sanger	Illumina	Sanger, 454, Illumina	Sanger
Assembly length (Mbp)	31.97	21.88	61.11	32.93	36.46	34.42	30.21	38.43	44.89	74.14	39.69	33.19	29.35	33.58	37.84	40.18	43.01	37.21
Contigs	3780	51	5899	965	108	799	264	1884	3115	1500	25	5152	706	6436	1359	5602	3503	880
Scaffolds	838	19	4865	207	68	157	20	586	41	56	21	502	72	6412	47	3308	407	108
Scaffolds >= 2kbp	124	19	2664	139	68	157	20	363	41	56	21	502	72	1428	47	1976	407	108
Scaffold N50	6	7	250	13	7	7	5	49	10	5	6	41	5	274	6	353	8	13
Scaffold L50 (Mbp)	2.49	1.3	0.06	0.96	1.84	1.79	2.6	0.24	1.77	5.9	2.67	0.26	2.04	0.04	1.99	0.03	2.14	1.05
Scaffold gaps	1471	16	517	379	20	321	122	649	1537	722	2	2325	317	12	656	1147	1552	386
Scaffold gaps length (bp)	1664114	10846	313668	838139	132281	1195965	135684	137330	1124837	410154	5997	1078040	433207	718	633731	254776	4758052	164388
Percentage of scaffolds in gaps	0.052	0.0005	0.0051	0.0255	0.0036	0.0347	0.0045	0.0036	0.0251	0.0055	0.0002	0.0325	0.0148	0	0.0167	0.0063	0.1106	0.0044
Repeat-covered regions	3614	1255	10643	4749	6607	5423	2415	3691	9729	11055	4255	19215	13207	5900	5651	5746	17482	3435
Repeat coverage length (bp)	1966018	176046	27157886	271827	3149562	2112130	1062828	376379	14381940	29287908	4866241	7755314	1726890	1033995	4633520	352165	5575524	1070722
Percentage of assembly covered by repeats	0.0615	0.008	0.4444	0.0083	0.0864	0.0614	0.0352	0.0098	0.3204	0.395	0.1226	0.2337	0.0588	0.0308	0.1224	0.0088	0.1296	0.0288
Annotation statistics
Predicted genes	10688	10513	14127	12720	13336	12250	12580	12352	12469	13107	10933	9739	10233	11799	12141	12117	11702	12380
Protein length (median)	360	338	351	359	355	367	329	415	334	351	357	367	372	382	370	413	376	348
Exon Length (median)	279	415	336	312	320	361	433	270	214	152	299	260	405	312	300	267	344	295
Gene length (median)	1233	1323	1149	1339	1365	1460	1568	1403	1162	1366	1313	1314	1687	1256	1368	1396	1383	1224
Transcript length (median)	1080	1236	1053	1202	1224	1322	1451	1245	1002	1191	1142	1161	1545	1146	1203	1239	1254	1095
Intron length (median)	60	60	58	59	59	58	58	60	65	48	64	68	72	56	59	59	57	57
Genes with intron	8479	6362	8716	9445	9961	8910	7964	9257	9453	9396	7740	7069	7044	8623	9502	9244	8708	10114
Percentage genes with intron	0.7933	0.6052	0.617	0.7425	0.7469	0.7273	0.6331	0.7494	0.7581	0.7169	0.7079	0.7258	0.6884	0.7308	0.7826	0.7629	0.7441	0.817
Introns per gene with intron (median)	2	1	1	2	2	2	2	2	2	2	2	2	2	2	2	2	2	2
Exons per gene (median)	2	2	2	2	2	2	2	3	2	2	2	2	2	2	2	3	2	2
Intergenic distance (bp, median)	804	564	653	752	783	810	738	867	640	662	892	726	778	747	834	897	897	782
Total gene length (bp)	16283705	14001585	19984388	18568016	19175814	18041335	16650810	21277470	18019862	21973945	16694328	14653594	15210014	17984799	18678751	20546800	17804754	17557034
Total gene length (% of total genome)	50.9343	63.9926	32.7023	56.3863	52.5941	52.4153	55.1169	55.3668	40.1423	29.6384	42.0618	44.1506	51.8229	53.5581	49.3624	51.1369	41.3968	47.1836
Gene density (genes / Mbp)	334.313	480.484	231.173	386.274	365.771	355.898	416.418	321.416	277.768	176.787	275.46	293.432	348.654	351.37	320.851	301.568	272.076	332.706
GC content of coding DNA (%)	54.3	55.8	54.8	53.3	53.2	53.1	54.7	51.6	54.1	53.1	55.8	54.6	54.1	53.8	53.8	51.3	55.8	54.8
With KOG annotation (% of total)	6096 (57.04%)	6483 (61.67%)	7975 (56.45%)	7733 (60.79%)	8024 (60.17%)	7548 (61.62%)	7256 (57.68%)	7850 (63.55%)	6914 (55.45%)	6595 (50.32%)	6240 (57.07%)	6684 (68.63%)	6962 (68.03%)	7693 (65.20%)	6624 (54.56%)	8048 (66.42%)	7544 (64.47%)	7304 (59.00%)
With hit to NR (NCBI) (% of total)	9271 (86.74%)	7926 (75.39%)	10075 (71.32%)	10993 (86.42%)	11455 (85.90%)	10903 (89.00%)	9186 (73.02%)	10555 (85.45%)	12342 (98.98%)	9212 (70.28%)	8419 (77.01%)	7875 (80.86%)	8176 (79.90%)	11700 (99.16%)	10043 (82.72%)	10481 (86.50%)	10609 (90.66%)	12245 (98.91%)
With hit to Swissprot (% of total)	7143 (66.83%)	6736 (64.07%)	8415 (59.57%)	8108 (63.74%)	8426 (63.18%)	7891 (64.42%)	7573 (60.20%)	8223 (66.57%)	7149 (57.33%)	7824 (59.69%)	7260 (66.40%)	6907 (70.92%)	7182 (70.18%)	7987 (67.69%)	7693 (63.36%)	8413 (69.43%)	7813 (66.77%)	7699 (62.19%)
With PFAM domain (% of total)	4674 (43.73%)	5623 (53.49%)	6912 (48.93%)	6867 (53.99%)	7129 (53.46%)	6728 (54.92%)	6298 (50.06%)	6800 (55.05%)	5692 (45.65%)	6456 (49.26%)	5130 (46.92%)	5479 (56.26%)	5766 (56.35%)	6462 (54.77%)	5324 (43.85%)	7018 (57.92%)	6543 (55.91%)	6389 (51.61%)
With transmembrane domain (% of total)	1880 (17.59%)	1726 (16.42%)	2387 (16.90%)	2432 (19.12%)	2503 (18.77%)	2446 (19.97%)	2069 (16.45%)	2488 (20.14%)	2111 (16.93%)	2183 (16.66%)	1908 (17.45%)	1766 (18.13%)	1840 (17.98%)	2107 (17.86%)	2190 (18.04%)	2503 (20.66%)	2193 (18.74%)	2250 (18.17%)
