# Supplementary material for: Diverse Lifestyles and Strategies of Plant Pathogenesis Encoded in the Genomes of Eighteen Dothideomycetes Fungi
Source: PLoS Pathog. 2012 Dec 6;8(12):e1003037. doi: 10.1371/journal.ppat.1003037 (PMC3516569; doi:10.1371/journal.ppat.1003037)
Supplement: Table S6 — Orthologous pairs of genes between Mycosphaerella graminicola and Leptosphaeria maculans that are up- or down-regulated in both organisms when expression during relatively early infection is compared to expression relatively late in infection. Each row represents an orthologous pair of genes. The protein IDs, expression ratio, GO annotation and PFAM annotation of each gene are indicated. (XLS) [file ppat.1003037.s015.xls]

## Sheet: Sheet1
Up-regulated
Ortholo-gous pair	M. graminicola proteinId	Expression ratio: log10(Day 14 / Day 9)	GO annotation	PFAM domains	L. maculans proteinId	Expression ratio: log10(Day 14 / Day 7)	GO annotation	PFAM domains
1	102173	2.35518	GO:0008270-zinc ion binding ; GO:0032440-2-alkenal reductase activity ; GO:0016491-oxidoreductase activity ;	PF00107:Zinc-containing alcohol dehydrogenase superfamily ;	3449	1.55	GO:0005488-binding ; GO:0003824-catalytic activity ; GO:0032440-2-alkenal reductase activity ; GO:0008152-metabolic process ;	PF00107:Alcohol dehydrogenase, zinc-binding ;
2	64875	1.83578	GO:0019538-protein metabolic process ; GO:0016671-oxidoreductase activity, acting on sulfur group of donors, disulfide as acceptor ;	PF01625:Peptide methionine sulfoxide reductase ;	11016	0.710068	GO:0019538-protein metabolic process ; GO:0016671-oxidoreductase activity, acting on sulfur group of donors, disulfide as acceptor ;	PF01625:Methionine sulphoxide reductase A ;
3	69430	1.8516	GO:0006801-superoxide metabolic process ; GO:0046872-metal ion binding ; GO:0004784-superoxide dismutase activity ;	PF02777:Manganese and iron superoxide dismutase ; PF00081:Manganese and iron superoxide dismutase ;	7159	1.06445	GO:0006801-superoxide metabolic process ; GO:0046872-metal ion binding ; GO:0004784-superoxide dismutase activity ;	PF02777:Manganese and iron superoxide dismutase ; PF00081:Manganese and iron superoxide dismutase ;
4	28649	1.41099			767	0.913815
5	76636	0.774727		PF04516:CP2 transcription factor ;	3012	0.885921		PF04516:CP2 transcription factor ;
6	103528	3.45316			8760	2.21059	GO:0048500-signal recognition particle ; GO:0008312-7S RNA binding ; GO:0006614-SRP-dependent cotranslational protein targeting to membrane ;
7	63510	1.89462			2469	1.61958
8	109168	3.54616	GO:0030145-manganese ion binding ; GO:0016787-hydrolase activity ;	PF01368:Phosphoesterase, RecJ-like ;	4407	1.26239	GO:0030145-manganese ion binding ; GO:0016787-hydrolase activity ;	PF01368:Phosphoesterase, RecJ-like ;
9	21413	1.25562			9556	1.00894
10	38008	3.75677			5754	1.7552
11	74566	3.91242	GO:0016021-integral to membrane ; GO:0016020-membrane ; GO:0006508-proteolysis ; GO:0015992-proton transport ; GO:0003824-catalytic activity ; GO:0008152-metabolic process ; GO:0005388-calcium-transporting ATPase activity ; GO:0006810-transport ; GO:0006812-cation transport ; GO:0004197-cysteine-type endopeptidase activity ; GO:0005524-ATP binding ; GO:0016820-hydrolase activity, acting on acid a…	PF00689:Cation transporting ATPase, C-terminal ; PF00122:E1-E2 ATPase-associated region ; PF00690:Cation transporting ATPase, N-terminal ; PF00702:Haloacid dehalogenase-like hydrolase ;	304	1.1276	GO:0016021-integral to membrane ; GO:0016020-membrane ; GO:0015992-proton transport ; GO:0003824-catalytic activity ; GO:0008152-metabolic process ; GO:0005388-calcium-transporting ATPase activity ; GO:0006810-transport ; GO:0006812-cation transport ; GO:0005524-ATP binding ; GO:0016820-hydrolase activity, acting on acid anhydrides, catalyzing transmembrane movement of substances ; GO:0015662-ATP…	PF00689:ATPase, P-type cation-transporter, C-terminal ; PF00122:E1-E2 ATPase-associated region ; PF00702:Haloacid dehalogenase-like hydrolase ; PF00690:ATPase, P-type cation-transporter, N-terminal ;
12	73220	1.43508			1117	0.910592
13	69117	1.18479	GO:0016021-integral to membrane ; GO:0016020-membrane ; GO:0005215-transporter activity ; GO:0008643-carbohydrate transport ; GO:0006810-transport ; GO:0005351-sugar:hydrogen symporter activity ; GO:0008733-L-arabinose isomerase activity ;	PF00083:General substrate transporter ;	872	2.60885	GO:0016021-integral to membrane ; GO:0016020-membrane ; GO:0005215-transporter activity ; GO:0008643-carbohydrate transport ; GO:0006810-transport ; GO:0005351-sugar:hydrogen symporter activity ; GO:0008733-L-arabinose isomerase activity ;	PF00083:General substrate transporter ;
14	80331	1.81156	GO:0008113-peptide-methionine-(S)-S-oxide reductase activity ;	PF01641:Protein of unknown function DUF25 ;	5274	0.983148	GO:0008113-peptide-methionine-(S)-S-oxide reductase activity ;	PF01641:Methionine sulphoxide reductase B ;
15	73131	0.963174	GO:0008270-zinc ion binding ; GO:0016491-oxidoreductase activity ;	PF00107:Zinc-containing alcohol dehydrogenase superfamily ;	5104	1.41727	GO:0005488-binding ; GO:0003824-catalytic activity ; GO:0003960-NADPH:quinone reductase activity ; GO:0008152-metabolic process ;	PF08240:Alcohol dehydrogenase GroES-like ; PF00107:Alcohol dehydrogenase, zinc-binding ;
16	69679	1.64287	GO:0008260-3-oxoacid CoA-transferase activity ; GO:0008410-CoA-transferase activity ; GO:0008152-metabolic process ;	PF01144:Coenzyme A transferase ;	7428	1.70733	GO:0008260-3-oxoacid CoA-transferase activity ; GO:0008410-CoA-transferase activity ; GO:0008152-metabolic process ;	PF01144:Coenzyme A transferase ;
17	102083	1.67147	GO:0004451-isocitrate lyase activity ; GO:0003824-catalytic activity ; GO:0019752-carboxylic acid metabolic process ; GO:0008152-metabolic process ;	PF00463:Isocitrate lyase and phosphorylmutase ;	8	1.32746	GO:0004451-isocitrate lyase activity ; GO:0003824-catalytic activity ; GO:0019752-carboxylic acid metabolic process ; GO:0008152-metabolic process ;	PF00463:Isocitrate lyase and phosphorylmutase ;
18	70772	3.04262		PF00400:G-protein beta WD-40 repeat ;	9304	0.775109		PF00400:WD40 repeat ;
19	66784	2.29152		PF07519:Tannase and feruloyl esterase ;	5470	0.895141		PF07519:Tannase and feruloyl esterase ;
20	103719	2.16102	GO:0016021-integral to membrane ; GO:0006813-potassium ion transport ; GO:0047681-aryl-alcohol dehydrogenase (NADP+) activity ; GO:0016491-oxidoreductase activity ;	PF00248:Aldo/keto reductase ;	7795	0.844877	GO:0016021-integral to membrane ; GO:0006813-potassium ion transport ; GO:0047681-aryl-alcohol dehydrogenase (NADP+) activity ; GO:0016491-oxidoreductase activity ;	PF00248:Aldo/keto reductase ;
21	68771	2.04252	GO:0008324-cation transmembrane transporter activity ; GO:0016020-membrane ; GO:0006812-cation transport ;	PF01545:Cation efflux protein ;	6120	1.76939	GO:0008324-cation transmembrane transporter activity ; GO:0016020-membrane ; GO:0006812-cation transport ;	PF01545:Cation efflux protein ;
22	66540	1.64866			9491	1.56499
23	102977	7.94727	GO:0006810-transport ; GO:0016020-membrane ; GO:0015171-amino acid transmembrane transporter activity ; GO:0006865-amino acid transport ;	PF00324:Amino acid permease-associated region ;	2234	0.697049	GO:0005507-copper ion binding ; GO:0016020-membrane ; GO:0015171-amino acid transmembrane transporter activity ; GO:0006810-transport ; GO:0006865-amino acid transport ;	PF00324:Amino acid permease-associated region ;
24	108999	2.53528	GO:0010181-FMN binding ; GO:0016629-12-oxophytodienoate reductase activity ; GO:0016491-oxidoreductase activity ;	PF00724:NADH:flavin oxidoreductase/NADH oxidase ;	5107	1.69883	GO:0010181-FMN binding ; GO:0016629-12-oxophytodienoate reductase activity ; GO:0016491-oxidoreductase activity ;	PF00724:NADH:flavin oxidoreductase/NADH oxidase, N-terminal ;
25	105735	1.79509	GO:0016491-oxidoreductase activity ; GO:0004024-alcohol dehydrogenase activity, zinc-dependent ; GO:0008270-zinc ion binding ; GO:0004025-alcohol dehydrogenase activity, iron-dependent ; GO:0004023-alcohol dehydrogenase activity, metal ion-independent ; GO:0004022-alcohol dehydrogenase activity ;	PF00107:Zinc-containing alcohol dehydrogenase superfamily ;	8625	2.23512	GO:0005488-binding ; GO:0003824-catalytic activity ; GO:0008152-metabolic process ; GO:0004024-alcohol dehydrogenase activity, zinc-dependent ; GO:0004025-alcohol dehydrogenase activity, iron-dependent ; GO:0004023-alcohol dehydrogenase activity, metal ion-independent ; GO:0004022-alcohol dehydrogenase activity ;	PF08240:Alcohol dehydrogenase GroES-like ; PF00107:Alcohol dehydrogenase, zinc-binding ;
26	109215	0.81093			9199	0.78027		PF08613:Cyclin-related 2 ;
27	76302	3.45062	GO:0004558-alpha-glucosidase activity ; GO:0004553-hydrolase activity, hydrolyzing O-glycosyl compounds ; GO:0005975-carbohydrate metabolic process ;	PF01055:Glycoside hydrolase, family 31 ;	4996	1.68132	GO:0004558-alpha-glucosidase activity ; GO:0004553-hydrolase activity, hydrolyzing O-glycosyl compounds ; GO:0005975-carbohydrate metabolic process ;	PF01055:Glycoside hydrolase, family 31 ;
28	65448	1.60944	GO:0008106-alcohol dehydrogenase (NADP+) activity ; GO:0008270-zinc ion binding ; GO:0016491-oxidoreductase activity ;	PF00107:Zinc-containing alcohol dehydrogenase superfamily ;	97	1.54709	GO:0033765-steroid dehydrogenase activity, acting on the CH-CH group of donors ; GO:0043713-(R)-2-hydroxyisocaproate dehydrogenase activity ; GO:0008875-gluconate dehydrogenase activity ; GO:0016491-oxidoreductase activity ; GO:0005488-binding ; GO:0003824-catalytic activity ; GO:0004033-aldo-keto reductase activity ; GO:0008152-metabolic process ; GO:0018453-2-hydroxytetrahydrofuran dehydrogenas…	PF08240:Alcohol dehydrogenase GroES-like ; PF00107:Alcohol dehydrogenase, zinc-binding ;
29	100990	0.993252			418	1.66747
30	68994	2.39243	GO:0005515-protein binding ;		8480	1.02249	GO:0005515-protein binding ;	PF00651:BTB/POZ ;
31	74939	6.05685			5952	0.771811
32	104009	4.08278		PF02469:Beta-Ig-H3/fasciclin ;	9129	1.33073		PF02469:Beta-Ig-H3/fasciclin ;
33	105685	2.33311	GO:0030529-ribonucleoprotein complex ; GO:0003723-RNA binding ; GO:0006396-RNA processing ; GO:0005634-nucleus ;	PF05383:RNA-binding protein Lupus Lal ;	8826	1.64658		PF05383:RNA-binding protein Lupus La ;
34	71387	1.29198	GO:0051920-peroxiredoxin activity ; GO:0016491-oxidoreductase activity ; GO:0016209-antioxidant activity ;	PF00578:Alkyl hydroperoxide reductase/ Thiol specific antioxidant/ Mal allergen ;	7067	0.790407	GO:0051920-peroxiredoxin activity ; GO:0016491-oxidoreductase activity ; GO:0016209-antioxidant activity ;	PF00578:Alkyl hydroperoxide reductase/ Thiol specific antioxidant/ Mal allergen ;
35	36903	1.02245	GO:0003700-transcription factor activity ; GO:0006350-transcription ; GO:0008270-zinc ion binding ; GO:0003677-DNA binding ; GO:0006355-regulation of transcription, DNA-dependent ; GO:0005634-nucleus ;	PF00172:Fungal transcriptional regulatory protein, N-terminal ; PF04082:Fungal specific transcription factor ;	1763	0.880652	GO:0003700-transcription factor activity ; GO:0006350-transcription ; GO:0008270-zinc ion binding ; GO:0003677-DNA binding ; GO:0006355-regulation of transcription, DNA-dependent ; GO:0005634-nucleus ;	PF00172:Fungal transcriptional regulatory protein, N-terminal ; PF04082:Fungal specific transcription factor ;
36	107209	0.989541			11337	1.16555
37	108951	2.0334			10485	1.75033
38	77210	5.37833	GO:0016289-CoA hydrolase activity ; GO:0016291-acyl-CoA thioesterase activity ;		10422	0.871499	GO:0016289-CoA hydrolase activity ; GO:0016291-acyl-CoA thioesterase activity ;
39	70944	2.7638			1286	0.736978
40	102170	0.951658	GO:0005783-endoplasmic reticulum ;		5670	0.822382	GO:0005783-endoplasmic reticulum ;	PF02453:Reticulon ;
41	66016	1.60141			3818	0.912031		PF00903:Glyoxalase/bleomycin resistance protein/dioxygenase ;
42	110308	1.53902	GO:0016021-integral to membrane ; GO:0016020-membrane ; GO:0005215-transporter activity ; GO:0008643-carbohydrate transport ; GO:0006810-transport ; GO:0005351-sugar:hydrogen symporter activity ; GO:0008733-L-arabinose isomerase activity ;	PF00083:General substrate transporter ;	10324	1.45763	GO:0016021-integral to membrane ; GO:0016020-membrane ; GO:0005215-transporter activity ; GO:0008643-carbohydrate transport ; GO:0006810-transport ; GO:0005351-sugar:hydrogen symporter activity ; GO:0008733-L-arabinose isomerase activity ;	PF00083:General substrate transporter ;
43	59769	1.37118			810	1.94737
44	75719	1.28923	GO:0008678-2-deoxy-D-gluconate 3-dehydrogenase activity ; GO:0016491-oxidoreductase activity ; GO:0008152-metabolic process ;	PF00106:Short-chain dehydrogenase/reductase SDR ;	9909	0.729786	GO:0005488-binding ; GO:0003824-catalytic activity ; GO:0008667-2,3-dihydro-2,3-dihydroxybenzoate dehydrogenase activity ; GO:0016491-oxidoreductase activity ; GO:0008152-metabolic process ;	PF00106:Short-chain dehydrogenase/reductase SDR ;
45	98385	3.27865	GO:0051920-peroxiredoxin activity ; GO:0016491-oxidoreductase activity ; GO:0016209-antioxidant activity ;	PF00578:Alkyl hydroperoxide reductase/ Thiol specific antioxidant/ Mal allergen ;	676	1.33063	GO:0051920-peroxiredoxin activity ; GO:0016491-oxidoreductase activity ; GO:0016209-antioxidant activity ;	PF00578:Alkyl hydroperoxide reductase/ Thiol specific antioxidant/ Mal allergen ;
46	57559	2.47989	GO:0008800-beta-lactamase activity ; GO:0030655-beta-lactam antibiotic catabolic process ; GO:0046677-response to antibiotic ;	PF00144:Beta-lactamase ;	6632	0.905789	GO:0008800-beta-lactamase activity ; GO:0030655-beta-lactam antibiotic catabolic process ; GO:0046677-response to antibiotic ;	PF00144:Beta-lactamase ;
47	69281	3.01798	GO:0019150-D-ribulokinase activity ; GO:0005975-carbohydrate metabolic process ;	PF00370:Carbohydrate kinase, FGGY ;	1417	0.84889	GO:0019150-D-ribulokinase activity ; GO:0005975-carbohydrate metabolic process ;	PF00370:Carbohydrate kinase, FGGY ;
48	108516	1.66203	GO:0008104-protein localization ;	PF06650:Protein of unknown function DUF1162 ;	568	0.946969	GO:0008104-protein localization ;	PF06650:Vacuolar protein sorting-associated protein ;
49	92766	3.09874	GO:0051920-peroxiredoxin activity ; GO:0016491-oxidoreductase activity ; GO:0016209-antioxidant activity ;	PF00578:Alkyl hydroperoxide reductase/ Thiol specific antioxidant/ Mal allergen ;	9267	0.71849	GO:0051920-peroxiredoxin activity ; GO:0016491-oxidoreductase activity ;	PF08534:Redoxin ;
50	64923	1.61542	GO:0016491-oxidoreductase activity ; GO:0008152-metabolic process ; GO:0004090-carbonyl reductase (NADPH) activity ;	PF00106:Short-chain dehydrogenase/reductase SDR ;	327	0.905767	GO:0005488-binding ; GO:0003824-catalytic activity ; GO:0016491-oxidoreductase activity ; GO:0008152-metabolic process ; GO:0004090-carbonyl reductase (NADPH) activity ;	PF00106:Short-chain dehydrogenase/reductase SDR ;
51	75665	1.55181	GO:0004608-phosphatidylethanolamine N-methyltransferase activity ;		8432	0.705735	GO:0004608-phosphatidylethanolamine N-methyltransferase activity ;
52	104937	5.40834	GO:0010181-FMN binding ;	PF01243:Pyridoxamine 5'-phosphate oxidase-related ;	621	2.43546	GO:0010181-FMN binding ;	PF01243:Pyridoxamine 5'-phosphate oxidase-related, FMN-binding core ;
53	65274	0.963174	GO:0015299-solute:hydrogen antiporter activity ; GO:0016021-integral to membrane ; GO:0006885-regulation of pH ;	PF00999:Sodium/hydrogen exchanger ;	11129	1.21066	GO:0015299-solute:hydrogen antiporter activity ; GO:0016021-integral to membrane ; GO:0006885-regulation of pH ;	PF00999:Sodium/hydrogen exchanger ;
54	65652	1.15057			55	0.704129	GO:0008270-zinc ion binding ;
55	59905	1.12168	GO:0004601-peroxidase activity ; GO:0006118-electron transport ;		3351	2.40848	GO:0004601-peroxidase activity ; GO:0006118-electron transport ;
56	69014	2.99823	GO:0004377-glycolipid 2-alpha-mannosyltransferase activity ; GO:0042283-dolichyl pyrophosphate Glc1Man9GlcNAc2 alpha-1,3-glucosyltransferase activity ; GO:0016020-membrane ; GO:0018716-1-phenanthrol glycosyltransferase activity ; GO:0008376-acetylgalactosaminyltransferase activity ; GO:0031278-alpha-1,2-galactosyltransferase activity ; GO:0000026-alpha-1,2-mannosyltransferase activity ; GO:004228…	PF01793:Glycosyl transferase, family 15 ;	2762	0.829616	GO:0004377-glycolipid 2-alpha-mannosyltransferase activity ; GO:0016020-membrane ; GO:0006486-protein amino acid glycosylation ;	PF01793:Glycosyl transferase, family 15 ;
57	69588	0.770108	GO:0005783-endoplasmic reticulum ; GO:0004308-exo-alpha-sialidase activity ;		8328	1.03979	GO:0004308-exo-alpha-sialidase activity ;
58	109129	3.045			11058	2.06318
59	106161	0.943906			3021	0.869593
60	102657	0.806476			2613	2.73891
61	103564	2.91561			11804	1.31507
62	107618	1.64094	GO:0003824-catalytic activity ; GO:0008152-metabolic process ; GO:0003987-acetate-CoA ligase activity ;	PF00501:AMP-dependent synthetase and ligase ;	9458	0.711316	GO:0016208-AMP binding ; GO:0003824-catalytic activity ; GO:0008152-metabolic process ; GO:0003987-acetate-CoA ligase activity ;	PF00501:AMP-dependent synthetase and ligase ;
63	73873	3.74313			8558	2.1172
64	69103	0.792993			4780	1.10565
65	219749	2.14943	GO:0016021-integral to membrane ; GO:0006810-transport ; GO:0005215-transporter activity ;	PF07690:Major facilitator superfamily MFS-1 ;	3506	0.884364	GO:0016021-integral to membrane ; GO:0006810-transport ; GO:0005215-transporter activity ;	PF07690:Major facilitator superfamily MFS-1 ;
66	102517	1.41099			5080	2.12551
67	72020	1.27815	GO:0016491-oxidoreductase activity ; GO:0004024-alcohol dehydrogenase activity, zinc-dependent ; GO:0046872-metal ion binding ; GO:0008152-metabolic process ; GO:0004025-alcohol dehydrogenase activity, iron-dependent ; GO:0004023-alcohol dehydrogenase activity, metal ion-independent ; GO:0004022-alcohol dehydrogenase activity ;	PF00465:Iron-containing alcohol dehydrogenase ;	11569	0.896228	GO:0016491-oxidoreductase activity ; GO:0004024-alcohol dehydrogenase activity, zinc-dependent ; GO:0046872-metal ion binding ; GO:0008152-metabolic process ; GO:0004025-alcohol dehydrogenase activity, iron-dependent ; GO:0004023-alcohol dehydrogenase activity, metal ion-independent ; GO:0004022-alcohol dehydrogenase activity ;	PF00465:Iron-containing alcohol dehydrogenase ;
68	64902	0.993252	GO:0004616-phosphogluconate dehydrogenase (decarboxylating) activity ; GO:0050661-NADP binding ; GO:0006098-pentose-phosphate shunt ;	PF00393:6-phosphogluconate dehydrogenase, C-terminal ; PF03446:6-phosphogluconate dehydrogenase, NAD-binding ;	10820	1.55264	GO:0016491-oxidoreductase activity ; GO:0005488-binding ; GO:0003824-catalytic activity ; GO:0050661-NADP binding ; GO:0006098-pentose-phosphate shunt ; GO:0008152-metabolic process ; GO:0004616-phosphogluconate dehydrogenase (decarboxylating) activity ;	PF00393:6-phosphogluconate dehydrogenase, C-terminal ; PF03446:6-phosphogluconate dehydrogenase, NAD-binding ;
69	58686	3.66791			9512	0.988239	GO:0016787-hydrolase activity ;	PF01738:Dienelactone hydrolase ;
70	68137	1.37372			4863	0.889886	GO:0043773-coenzyme F420-0 gamma-glutamyl ligase activity ; GO:0043774-coenzyme F420-2 alpha-glutamyl ligase activity ; GO:0008766-UDP-N-acetylmuramoylalanyl-D-glutamyl-2,6-diaminopimelate-D-alanyl-D-alanine ligase activity ; GO:0018169-ribosomal S6-glutamic acid ligase activity ;
71	72837	2.58701			2450	1.57367
72	106395	2.17475	GO:0009086-methionine biosynthetic process ; GO:0003871-5-methyltetrahydropteroyltriglutamate-homocysteine S-methyltransferase activity ;	PF01717:Methionine synthase, vitamin-B12 independent ;	10410	0.815854	GO:0008652-amino acid biosynthetic process ; GO:0009086-methionine biosynthetic process ; GO:0003871-5-methyltetrahydropteroyltriglutamate-homocysteine S-methyltransferase activity ; GO:0008270-zinc ion binding ;	PF01717:Methionine synthase, vitamin-B12 independent ; PF08267:Cobalamin (vitamin B12)-independent methionine synthase MetE, N-terminal ;
73	76044	1.98787	GO:0032313-regulation of Rab GTPase activity ; GO:0005622-intracellular ; GO:0005097-Rab GTPase activator activity ;	PF00566:RabGAP/TBC ;	4373	0.83164	GO:0032313-regulation of Rab GTPase activity ; GO:0005622-intracellular ; GO:0005097-Rab GTPase activator activity ;	PF00566:RabGAP/TBC ;
74	38717	1.29198			1635	1.60696
75	100421	1.0116	GO:0006979-response to oxidative stress ; GO:0004601-peroxidase activity ; GO:0006118-electron transport ; GO:0020037-heme binding ;	PF03098:Animal haem peroxidase ;	2451	1.13057	GO:0005506-iron ion binding ; GO:0006118-electron transport ; GO:0020037-heme binding ; GO:0006979-response to oxidative stress ; GO:0004601-peroxidase activity ; GO:0004497-monooxygenase activity ;	PF00067:Cytochrome P450 ; PF03098:Haem peroxidase, animal ;
76	90001	0.760806			9103	1.4083		PF00399:Yeast PIR protein repeat ;
77	106098	1.77326	GO:0016787-hydrolase activity ;		998	1.09835	GO:0007186-G-protein coupled receptor protein signaling pathway ; GO:0016021-integral to membrane ; GO:0016787-hydrolase activity ; GO:0047372-acylglycerol lipase activity ; GO:0001584-rhodopsin-like receptor activity ;	PF00561:Alpha/beta hydrolase fold-1 ;
78	70677	1.38879	GO:0004474-malate synthase activity ; GO:0006097-glyoxylate cycle ;	PF01274:Malate synthase ;	9168	1.10973	GO:0003824-catalytic activity ; GO:0004474-malate synthase activity ; GO:0006097-glyoxylate cycle ;	PF01274:Malate synthase ;
79	65978	3.04405	GO:0008270-zinc ion binding ; GO:0003960-NADPH:quinone reductase activity ; GO:0016491-oxidoreductase activity ;	PF00107:Zinc-containing alcohol dehydrogenase superfamily ;	9000	1.97531	GO:0005488-binding ; GO:0003824-catalytic activity ; GO:0008152-metabolic process ; GO:0043738-F420H2 dehydrogenase activity ; GO:0051341-regulation of oxidoreductase activity ; GO:0043826-sulfur oxygenase reductase activity ; GO:0043883-malolactic enzyme activity ;	PF08240:Alcohol dehydrogenase GroES-like ; PF00107:Alcohol dehydrogenase, zinc-binding ;
80	106037	2.53924			3321	1.6849
81	50647	2.95387			4551	1.20059
82	102936	3.76723	GO:0016491-oxidoreductase activity ; GO:0008152-metabolic process ;	PF00106:Short-chain dehydrogenase/reductase SDR ;	10682	1.72997	GO:0005488-binding ; GO:0003824-catalytic activity ; GO:0016491-oxidoreductase activity ; GO:0008152-metabolic process ; GO:0004090-carbonyl reductase (NADPH) activity ;	PF00106:Short-chain dehydrogenase/reductase SDR ;
83	48706	3.06898	GO:0003824-catalytic activity ; GO:0008152-metabolic process ; GO:0004630-phospholipase D activity ;	PF00614:Phospholipase D/Transphosphatidylase ;	2301	0.850973	GO:0003824-catalytic activity ; GO:0008152-metabolic process ; GO:0004630-phospholipase D activity ;	PF00614:Phospholipase D/Transphosphatidylase ;
84	98377	1.36098	GO:0005975-carbohydrate metabolic process ; GO:0004476-mannose-6-phosphate isomerase activity ; GO:0008270-zinc ion binding ;	PF01238:Mannose-6-phosphate isomerase, type I ;	9650	2.14971	GO:0005975-carbohydrate metabolic process ; GO:0004476-mannose-6-phosphate isomerase activity ; GO:0008270-zinc ion binding ;	PF01238:Mannose-6-phosphate isomerase, type I ;
85	98331	2.09063	GO:0006979-response to oxidative stress ; GO:0020037-heme binding ; GO:0004096-catalase activity ; GO:0005506-iron ion binding ; GO:0006118-electron transport ;	PF06628:Catalase-related ; PF01965:ThiJ/PfpI ; PF00199:Catalase ;	3846	1.87089	GO:0006979-response to oxidative stress ; GO:0020037-heme binding ; GO:0004096-catalase activity ; GO:0005506-iron ion binding ; GO:0006118-electron transport ;	PF06628:Catalase-related ; PF01965:ThiJ/PfpI ; PF00199:Catalase, N-terminal ;
86	83424	2.12106	GO:0006814-sodium ion transport ; GO:0016020-membrane ; GO:0008508-bile acid:sodium symporter activity ;	PF01758:Bile acid:sodium symporter ;	3558	1.58249	GO:0016021-integral to membrane ; GO:0006814-sodium ion transport ; GO:0016020-membrane ; GO:0008508-bile acid:sodium symporter activity ;	PF01758:Bile acid:sodium symporter ;
87	98369	3.18553	GO:0018802-2,4-dihydroxyhept-2-ene-1,7-dioate aldolase activity ; GO:0043801-hexulose-6-phosphate synthase activity ; GO:0043876-D-threonine aldolase activity ; GO:0008732-L-allo-threonine aldolase activity ; GO:0016829-lyase activity ; GO:0043863-4-hydroxy-2-ketopimelate aldolase activity ;	PF03894:D-xylulose 5-phosphate/D-fructose 6-phosphate phosphoketolase ;	1060	1.9679	GO:0018802-2,4-dihydroxyhept-2-ene-1,7-dioate aldolase activity ; GO:0043801-hexulose-6-phosphate synthase activity ; GO:0003824-catalytic activity ; GO:0043876-D-threonine aldolase activity ; GO:0008152-metabolic process ; GO:0008732-L-allo-threonine aldolase activity ; GO:0016829-lyase activity ; GO:0043863-4-hydroxy-2-ketopimelate aldolase activity ;	PF03894:D-xylulose 5-phosphate/D-fructose 6-phosphate phosphoketolase ;
88	102207	2.10657	GO:0008270-zinc ion binding ; GO:0003676-nucleic acid binding ; GO:0005622-intracellular ;	PF00096:Zn-finger, C2H2 type ;	10334	0.724554	GO:0008270-zinc ion binding ; GO:0003676-nucleic acid binding ; GO:0005622-intracellular ; GO:0004308-exo-alpha-sialidase activity ;	PF00096:Zinc finger, C2H2-type ;
89	95573	1.44692	GO:0008746-NAD(P) transhydrogenase activity ; GO:0015992-proton transport ; GO:0006118-electron transport ; GO:0016491-oxidoreductase activity ; GO:0008750-NAD(P)+ transhydrogenase (AB-specific) activity ;	PF02233:NAD(P) transhydrogenase, beta subunit ; PF05222:Alanine dehydrogenase/PNT, N-terminal ; PF01262:Alanine dehydrogenase/PNT, C-terminal ;	1157	0.864371	GO:0016491-oxidoreductase activity ; GO:0015992-proton transport ; GO:0005488-binding ; GO:0003824-catalytic activity ; GO:0008152-metabolic process ; GO:0008746-NAD(P) transhydrogenase activity ; GO:0006118-electron transport ; GO:0008750-NAD(P)+ transhydrogenase (AB-specific) activity ;	PF02233:NAD(P) transhydrogenase, beta subunit ; PF05222:Alanine dehydrogenase/PNT, N-terminal ; PF01262:Alanine dehydrogenase/PNT, C-terminal ;
90	39200	3.54414			4106	0.85836	GO:0005488-binding ; GO:0003824-catalytic activity ; GO:0008152-metabolic process ;	PF03435:Saccharopine dehydrogenase ;
91	99929	1.49515			6743	1.08195		PF08588:Protein of unknown function DUF1769 ;
92	102842	2.41144	GO:0008106-alcohol dehydrogenase (NADP+) activity ; GO:0008270-zinc ion binding ; GO:0016491-oxidoreductase activity ;	PF00107:Zinc-containing alcohol dehydrogenase superfamily ;	9395	1.23287	GO:0016491-oxidoreductase activity ; GO:0005488-binding ; GO:0003824-catalytic activity ; GO:0008152-metabolic process ; GO:0008106-alcohol dehydrogenase (NADP+) activity ; GO:0008270-zinc ion binding ;	PF08240:Alcohol dehydrogenase GroES-like ; PF00107:Alcohol dehydrogenase, zinc-binding ;
93	102682	2.37304			7881	2.61668
94	62800	3.29138			5528	1.60635		PF04678:Protein of unknown function DUF607 ;
95	103912	1.10856	GO:0003824-catalytic activity ; GO:0008152-metabolic process ;	PF00857:Isochorismatase hydrolase ;	1888	1.41776	GO:0003824-catalytic activity ; GO:0008152-metabolic process ;	PF00857:Isochorismatase hydrolase ;
96	42164	1.96851			887	1.37032
97	108584	1.37372			943	0.839976
98	57881	2.30358	GO:0016491-oxidoreductase activity ; GO:0004024-alcohol dehydrogenase activity, zinc-dependent ; GO:0008270-zinc ion binding ; GO:0004025-alcohol dehydrogenase activity, iron-dependent ; GO:0004023-alcohol dehydrogenase activity, metal ion-independent ; GO:0004022-alcohol dehydrogenase activity ;	PF00107:Zinc-containing alcohol dehydrogenase superfamily ;	3517	2.18376	GO:0016491-oxidoreductase activity ; GO:0005488-binding ; GO:0003824-catalytic activity ; GO:0008152-metabolic process ; GO:0008270-zinc ion binding ; GO:0004024-alcohol dehydrogenase activity, zinc-dependent ; GO:0004025-alcohol dehydrogenase activity, iron-dependent ; GO:0004023-alcohol dehydrogenase activity, metal ion-independent ; GO:0004022-alcohol dehydrogenase activity ;	PF08240:Alcohol dehydrogenase GroES-like ; PF00107:Alcohol dehydrogenase, zinc-binding ;
Down-regulated
Orthologous pair	M. graminicola proteinId	Expression ratio: log10(Day 14 / Day 9)	GO annotation	PFAM domains	L. maculans proteinId	Expression ratio: log10(Day 14 / Day 7)	GO annotation	PFAM domains
1	111221	-2.52573	GO:0016998-cell wall catabolic process ;	PF01476:Peptidoglycan-binding LysM ;	11099	-1.76608	GO:0016998-cell wall catabolic process ;	PF01476:Peptidoglycan-binding LysM ;
2	106573	-0.71335	GO:0005216-ion channel activity ; GO:0006811-ion transport ; GO:0016020-membrane ;	PF01036:Bacterial rhodopsin ;	6466	-1.52441	GO:0005216-ion channel activity ; GO:0006811-ion transport ; GO:0016020-membrane ;	PF01036:Rhodopsin, bacterial ;
3	73506	-1.04982	GO:0004579-dolichyl-diphosphooligosaccharide-protein glycotransferase activity ;	PF04756:OST3/OST6 ;	1014	-0.697498	GO:0004579-dolichyl-diphosphooligosaccharide-protein glycotransferase activity ;	PF04756:OST3/OST6 ;
4	111537	-0.733969			10465	-0.91778
5	77057	-1.46968	GO:0008270-zinc ion binding ; GO:0005515-protein binding ;	PF03105:SPX, N-terminal ;	2999	-0.789351	GO:0008270-zinc ion binding ; GO:0005515-protein binding ;	PF00097:Zinc finger, RING-type ;
6	83835	-1.89712	GO:0005783-endoplasmic reticulum ; GO:0005524-ATP binding ;	PF00012:Heat shock protein Hsp70 ;	5111	-1.02878	GO:0005524-ATP binding ;	PF00012:Heat shock protein 70 ;
7	84991	-0.891598		PF03801:HEC/Ndc80p ;	1351	-0.706327	GO:0016192-vesicle-mediated transport ; GO:0016020-membrane ; GO:0005515-protein binding ;	PF03801:HEC/Ndc80p ;
8	107276	-1.10866			4862	-0.87156	GO:0005488-binding ;
9	111173	-0.867501			2939	-0.881682
10	107186	-0.733969	GO:0015462-protein-transmembrane transporting ATPase activity ; GO:0006508-proteolysis ; GO:0042626-ATPase activity, coupled to transmembrane movement of substances ; GO:0016887-ATPase activity ; GO:0003676-nucleic acid binding ; GO:0004004-ATP-dependent RNA helicase activity ; GO:0017116-single-stranded DNA-dependent ATP-dependent DNA helicase activity ; GO:0008026-ATP-dependent helicase activit…	PF00271:Helicase, C-terminal ; PF00176:SNF2-related ;	5848	-0.700198	GO:0007186-G-protein coupled receptor protein signaling pathway ; GO:0016021-integral to membrane ; GO:0042626-ATPase activity, coupled to transmembrane movement of substances ; GO:0005488-binding ; GO:0003676-nucleic acid binding ; GO:0004004-ATP-dependent RNA helicase activity ; GO:0017116-single-stranded DNA-dependent ATP-dependent DNA helicase activity ; GO:0008026-ATP-dependent helicase acti…	PF00176:SNF2-related ; PF02985:HEAT ; PF00271:DNA/RNA helicase, C-terminal ;
