# Supplementary material for: Diverse Lifestyles and Strategies of Plant Pathogenesis Encoded in the Genomes of Eighteen Dothideomycetes Fungi
Source: PLoS Pathog. 2012 Dec 6;8(12):e1003037. doi: 10.1371/journal.ppat.1003037 (PMC3516569; doi:10.1371/journal.ppat.1003037)
Supplement: Table S11 — Functional annotation terms that are over- or under-represented in genes that are located in at least one syntenic block (described in Table S9). For each species the over-represented terms are indicated. (XLS) [file ppat.1003037.s020.xls]

## Sheet: Myco_Enrichment
Cladosporium fulvum: 279 unique proteinIds in synteny blocks
Annotation term	Description	# proteins in study set with annotation term	# proteins in study set without annotation term	# other proteins with annotation term	# other proteins without annotation term	Over/Under-represented	p-value
GO:0003674	molecular_function	181	98	5942	7906	Over-represented	1.00985e-09
all	all	188	91	6329	7519	Over-represented	1.00985e-09
GO:0005622	intracellular	59	220	1318	12530	Over-represented	9.57692e-06
GO:0005623	cell	79	200	2130	11718	Over-represented	4.16047e-05
GO:0044464	cell part	79	200	2130	11718	Over-represented	4.16047e-05
GO:0005575	cellular_component	79	200	2172	11676	Over-represented	7.25881e-05
GO:0016740	transferase activity	42	237	890	12958	Over-represented	0.000238309
GO:0044424	intracellular part	47	232	1073	12775	Over-represented	0.000331311
GO:0032991	macromolecular complex	27	252	450	13398	Over-represented	0.000331311
GO:0009987	cellular process	78	201	2346	11502	Over-represented	0.00192776
GO:0043234	protein complex	19	260	305	13543	Over-represented	0.0073161
GO:0016769	transferase activity, transferring nitrogenous groups	6	273	28	13820	Over-represented	0.0131034
GO:0005737	cytoplasm	24	255	475	13373	Over-represented	0.0137035
GO:0004576	oligosaccharyl transferase activity	5	274	17	13831	Over-represented	0.0137035
GO:0019187	beta-1,4-mannosyltransferase activity	4	275	12	13836	Over-represented	0.0161715
GO:0016759	cellulose synthase activity	4	275	12	13836	Over-represented	0.0161715
GO:0046527	glucosyltransferase activity	5	274	23	13825	Over-represented	0.0161715
GO:0008755	O antigen polymerase activity	4	275	12	13836	Over-represented	0.0161715
GO:0008378	galactosyltransferase activity	4	275	12	13836	Over-represented	0.0161715
GO:0008376	acetylgalactosaminyltransferase activity	4	275	12	13836	Over-represented	0.0161715
GO:0003980	UDP-glucose:glycoprotein glucosyltransferase activity	4	275	12	13836	Over-represented	0.0161715
GO:0001962	alpha-1,3-galactosyltransferase activity	4	275	12	13836	Over-represented	0.0161715
GO:0042283	dolichyl pyrophosphate Glc1Man9GlcNAc2 alpha-1,3-glucosyltransferase activity	4	275	12	13836	Over-represented	0.0161715
GO:0042281	dolichyl pyrophosphate Man9GlcNAc2 alpha-1,3-glucosyltransferase activity	4	275	12	13836	Over-represented	0.0161715
GO:0006334	nucleosome assembly	4	275	11	13837	Over-represented	0.0161715
GO:0000785	chromatin	5	274	23	13825	Over-represented	0.0161715
GO:0000786	nucleosome	4	275	10	13838	Over-represented	0.0161715
GO:0019112	phenanthrol glycosyltransferase activity	4	275	12	13836	Over-represented	0.0161715
GO:0015020	glucuronosyltransferase activity	4	275	12	13836	Over-represented	0.0161715
GO:0008150	biological_process	113	166	4129	9719	Over-represented	0.0161715
GO:0008921	lipopolysaccharide-1,6-galactosyltransferase activity	4	275	12	13836	Over-represented	0.0161715
GO:0046921	alpha(1,6)-fucosyltransferase activity	4	275	12	13836	Over-represented	0.0161715
GO:0046920	alpha(1,3)-fucosyltransferase activity	4	275	12	13836	Over-represented	0.0161715
GO:0018717	9-phenanthrol glycosyltransferase activity	4	275	12	13836	Over-represented	0.0161715
GO:0018716	1-phenanthrol glycosyltransferase activity	4	275	12	13836	Over-represented	0.0161715
GO:0018715	9-phenanthrol UDP-glucuronosyltransferase activity	4	275	12	13836	Over-represented	0.0161715
GO:0018718	1,2-dihydroxy-phenanthrene glycosyltransferase activity	4	275	12	13836	Over-represented	0.0161715
GO:0045140	inositol phosphoceramide synthase activity	4	275	12	13836	Over-represented	0.0161715
GO:0033556	dolichyl pyrophosphate Man7GlcNAc2 alpha-1,3-glucosyltransferase activity	4	275	12	13836	Over-represented	0.0161715
GO:0035251	UDP-glucosyltransferase activity	5	274	23	13825	Over-represented	0.0161715
GO:0008417	fucosyltransferase activity	4	275	12	13836	Over-represented	0.0161715
GO:0004583	dolichyl-phosphate-glucose-glycolipid alpha-glucosyltransferase activity	4	275	12	13836	Over-represented	0.0161715
GO:0016253	UDP-N-acetylglucosamine-peptide N-acetylglucosaminyltransferase activity	4	275	12	13836	Over-represented	0.0161715
GO:0031278	alpha-1,2-galactosyltransferase activity	4	275	12	13836	Over-represented	0.0161715
GO:0035250	UDP-galactosyltransferase activity	4	275	12	13836	Over-represented	0.0161715
GO:0000033	alpha-1,3-mannosyltransferase activity	4	275	12	13836	Over-represented	0.0161715
GO:0008483	transaminase activity	5	274	24	13824	Over-represented	0.0164387
GO:0003676	nucleic acid binding	34	245	859	12989	Over-represented	0.0170108
GO:0003824	catalytic activity	113	166	4166	9682	Over-represented	0.0188915
GO:0000026	alpha-1,2-mannosyltransferase activity	4	275	13	13835	Over-represented	0.0191547
GO:0009058	biosynthetic process	23	256	503	13345	Over-represented	0.021968
GO:0000009	alpha-1,6-mannosyltransferase activity	4	275	15	13833	Over-represented	0.0290755
GO:0006333	chromatin assembly or disassembly	5	274	29	13819	Over-represented	0.0315127
GO:0004129	cytochrome-c oxidase activity	3	276	6	13842	Over-represented	0.0330503
GO:0015002	heme-copper terminal oxidase activity	3	276	6	13842	Over-represented	0.0330503
GO:0043232	intracellular non-membrane-bounded organelle	13	266	214	13634	Over-represented	0.0330503
GO:0043228	non-membrane-bounded organelle	13	266	214	13634	Over-represented	0.0330503
GO:0016676	oxidoreductase activity, acting on heme group of donors, oxygen as acceptor	3	276	6	13842	Over-represented	0.0330503
GO:0016675	oxidoreductase activity, acting on heme group of donors	3	276	6	13842	Over-represented	0.0330503
GO:0044444	cytoplasmic part	17	262	335	13513	Over-represented	0.0355925
GO:0044427	chromosomal part	5	274	31	13817	Over-represented	0.0359206
GO:0031497	chromatin assembly	4	275	17	13831	Over-represented	0.0359223
GO:0004376	glycolipid mannosyltransferase activity	4	275	17	13831	Over-represented	0.0359223
GO:0006323	DNA packaging	4	275	18	13830	Over-represented	0.0420283
GO:0004427	inorganic diphosphatase activity	3	276	7	13841	Over-represented	0.0420283
GO:0005488	binding	89	190	3193	10655	Over-represented	0.0455557
GO:0006325	establishment and/or maintenance of chromatin architecture	5	274	34	13814	Over-represented	0.0455557
GO:0003900	DNA-directed RNA polymerase I activity	5	274	34	13814	Over-represented	0.0455557
GO:0003901	DNA-directed RNA polymerase II activity	5	274	34	13814	Over-represented	0.0455557
GO:0003902	DNA-directed RNA polymerase III activity	5	274	34	13814	Over-represented	0.0455557
GO:0030170	pyridoxal phosphate binding	6	273	53	13795	Over-represented	0.0484379
GO:0019842	vitamin binding	8	271	96	13752	Over-represented	0.0484379
KOG___INFORMATION STORAGE AND PROCESSING		60	219	1339	12509	Over-represented	1.91845e-05
KOG___Transcription		24	255	362	13486	Over-represented	0.00116111
PF00125	Histone core	4	275	4	13844	Over-represented	0.0238729
Transcription Factor		15	264	260	13588	Over-represented	0.000381792
Bromodomain transcription factor		2	277	1	13847	Over-represented	0.00115076
Zinc finger, GRF-type		1	278	0	13848	Over-represented	0.0197494
SART1		1	278	0	13848	Over-represented	0.0197494
Has signal peptide		11	268	1018	12830	Under-represented	0.0267128
C2H2 zinc finger		3	276	39	13809	Over-represented	0.0497309
Septoria populicola: 301 unique proteinIds in synteny blocks
Annotation term	Description	# proteins in study set with annotation term	# proteins in study set without annotation term	# other proteins with annotation term	# other proteins without annotation term	Over/Under-represented	p-value
Transcription Factor		17	284	233	9205	Over-represented	0.00227489
Bromodomain transcription factor		2	299	1	9437	Over-represented	0.00279796
Zinc finger, GRF-type		1	300	0	9438	Over-represented	0.0309067
Dothistroma septosporum: 333 unique proteinIds in synteny blocks
Annotation term	Description	# proteins in study set with annotation term	# proteins in study set without annotation term	# other proteins with annotation term	# other proteins without annotation term	Over/Under-represented	p-value
GO:0003674	molecular_function	207	126	5210	7038	Over-represented	4.49163e-09
all	all	216	117	5569	6679	Over-represented	4.5742e-09
GO:0005622	intracellular	69	264	1325	10923	Over-represented	0.000220179
GO:0005623	cell	91	242	2012	10236	Over-represented	0.000487802
GO:0044464	cell part	91	242	2012	10236	Over-represented	0.000487802
GO:0005575	cellular_component	91	242	2037	10211	Over-represented	0.000934905
GO:0016740	transferase activity	46	287	803	11445	Over-represented	0.00167296
GO:0044424	intracellular part	55	278	1068	11180	Over-represented	0.00357214
GO:0009987	cellular process	93	240	2222	10026	Over-represented	0.0055727
GO:0032991	macromolecular complex	29	304	445	11803	Over-represented	0.00861983
GO:0004871	signal transducer activity	11	322	96	12152	Over-represented	0.0308138
GO:0008150	biological_process	135	198	3714	8534	Over-represented	0.0308138
GO:0060089	molecular transducer activity	11	322	96	12152	Over-represented	0.0308138
GO:0016769	transferase activity, transferring nitrogenous groups	6	327	26	12222	Over-represented	0.0391268
GO:0007165	signal transduction	13	320	150	12098	Over-represented	0.0467437
GO:0008755	O antigen polymerase activity	4	329	12	12236	Over-represented	0.0467437
GO:0016759	cellulose synthase activity	4	329	12	12236	Over-represented	0.0467437
GO:0005737	cytoplasm	28	305	487	11761	Over-represented	0.0467437
GO:0008378	galactosyltransferase activity	4	329	12	12236	Over-represented	0.0467437
GO:0008376	acetylgalactosaminyltransferase activity	4	329	12	12236	Over-represented	0.0467437
GO:0003980	UDP-glucose:glycoprotein glucosyltransferase activity	4	329	12	12236	Over-represented	0.0467437
GO:0001962	alpha-1,3-galactosyltransferase activity	4	329	12	12236	Over-represented	0.0467437
GO:0042283	dolichyl pyrophosphate Glc1Man9GlcNAc2 alpha-1,3-glucosyltransferase activity	4	329	12	12236	Over-represented	0.0467437
GO:0042281	dolichyl pyrophosphate Man9GlcNAc2 alpha-1,3-glucosyltransferase activity	4	329	12	12236	Over-represented	0.0467437
GO:0006334	nucleosome assembly	4	329	12	12236	Over-represented	0.0467437
GO:0000785	chromatin	5	328	17	12231	Over-represented	0.0467437
GO:0000786	nucleosome	4	329	10	12238	Over-represented	0.0467437
GO:0019187	beta-1,4-mannosyltransferase activity	4	329	12	12236	Over-represented	0.0467437
GO:0019112	phenanthrol glycosyltransferase activity	4	329	12	12236	Over-represented	0.0467437
GO:0018717	9-phenanthrol glycosyltransferase activity	4	329	12	12236	Over-represented	0.0467437
GO:0015020	glucuronosyltransferase activity	4	329	12	12236	Over-represented	0.0467437
GO:0004576	oligosaccharyl transferase activity	5	328	17	12231	Over-represented	0.0467437
GO:0030170	pyridoxal phosphate binding	7	326	47	12201	Over-represented	0.0467437
GO:0046921	alpha(1,6)-fucosyltransferase activity	4	329	12	12236	Over-represented	0.0467437
GO:0018716	1-phenanthrol glycosyltransferase activity	4	329	12	12236	Over-represented	0.0467437
GO:0018715	9-phenanthrol UDP-glucuronosyltransferase activity	4	329	12	12236	Over-represented	0.0467437
GO:0018718	1,2-dihydroxy-phenanthrene glycosyltransferase activity	4	329	12	12236	Over-represented	0.0467437
GO:0008921	lipopolysaccharide-1,6-galactosyltransferase activity	4	329	12	12236	Over-represented	0.0467437
GO:0045140	inositol phosphoceramide synthase activity	4	329	12	12236	Over-represented	0.0467437
GO:0033556	dolichyl pyrophosphate Man7GlcNAc2 alpha-1,3-glucosyltransferase activity	4	329	12	12236	Over-represented	0.0467437
GO:0008417	fucosyltransferase activity	4	329	12	12236	Over-represented	0.0467437
GO:0004583	dolichyl-phosphate-glucose-glycolipid alpha-glucosyltransferase activity	4	329	12	12236	Over-represented	0.0467437
GO:0046920	alpha(1,3)-fucosyltransferase activity	4	329	12	12236	Over-represented	0.0467437
GO:0016253	UDP-N-acetylglucosamine-peptide N-acetylglucosaminyltransferase activity	4	329	12	12236	Over-represented	0.0467437
GO:0031278	alpha-1,2-galactosyltransferase activity	4	329	12	12236	Over-represented	0.0467437
GO:0035250	UDP-galactosyltransferase activity	4	329	12	12236	Over-represented	0.0467437
GO:0000033	alpha-1,3-mannosyltransferase activity	4	329	12	12236	Over-represented	0.0467437
GO:0007154	cell communication	14	319	164	12084	Over-represented	0.0467437
KOG___INFORMATION STORAGE AND PROCESSING		68	265	1225	11023	Over-represented	7.60077e-05
PF00125	Histone core	4	329	3	12245	Over-represented	0.0386542
Transcription Factor		19	314	289	11959	Over-represented	0.000790737
Bromodomain transcription factor		2	331	1	12247	Over-represented	0.00205884
GATA type zinc finger		2	331	5	12243	Over-represented	0.0134321
Zinc finger, GRF-type		1	332	0	12248	Over-represented	0.0264685
SART1		1	332	0	12248	Over-represented	0.0264685
Septoria musiva: 335 unique proteinIds in synteny blocks
Annotation term	Description	# proteins in study set with annotation term	# proteins in study set without annotation term	# other proteins with annotation term	# other proteins without annotation term	Over/Under-represented	p-value
GO:0003674	molecular_function	201	134	4781	5117	Over-represented	0.0475497
GO:0005622	intracellular	72	263	1267	8631	Over-represented	0.0475497
Transcription Factor		20	315	247	9651	Over-represented	0.000606867
Bromodomain transcription factor		2	333	1	9897	Over-represented	0.00313633
GATA type zinc finger		2	333	5	9893	Over-represented	0.020122
Zinc finger, GRF-type		1	334	0	9898	Over-represented	0.0327372
SART1		1	334	0	9898	Over-represented	0.0327372
Has signal peptide		15	320	738	9160	Under-represented	0.0423731
Mycosphaerella graminicola: 305 unique proteinIds in synteny blocks
Annotation term	Description	# proteins in study set with annotation term	# proteins in study set without annotation term	# other proteins with annotation term	# other proteins without annotation term	Over/Under-represented	p-value
GO:0003674	molecular_function	180	125	4688	5978	Over-represented	0.000357126
all	all	191	114	5053	5613	Over-represented	0.000357126
GO:0005622	intracellular	62	243	1150	9516	Over-represented	0.00172799
GO:0005623	cell	84	221	1817	8849	Over-represented	0.00451844
GO:0044464	cell part	84	221	1817	8849	Over-represented	0.00451844
GO:0044424	intracellular part	51	254	929	9737	Over-represented	0.00475904
GO:0005575	cellular_component	84	221	1847	8819	Over-represented	0.00475904
GO:0032991	macromolecular complex	30	275	423	10243	Over-represented	0.00475904
GO:0043232	intracellular non-membrane-bounded organelle	17	288	194	10472	Over-represented	0.0258776
GO:0043228	non-membrane-bounded organelle	17	288	194	10472	Over-represented	0.0258776
GO:0000785	chromatin	5	300	13	10653	Over-represented	0.0292701
GO:0000786	nucleosome	4	301	7	10659	Over-represented	0.0434713
KOG___INFORMATION STORAGE AND PROCESSING		62	243	1139	9527	Over-represented	0.00460196
KOG___Transcription		23	282	296	10370	Over-represented	0.0440687
PF00125	Histone core	4	301	2	10664	Over-represented	0.0163535
Transcription Factor		18	287	228	10438	Over-represented	0.000174546
Has signal peptide		9	296	811	9855	Under-represented	0.00121971
Bromodomain transcription factor		2	303	1	10665	Over-represented	0.00226866
GATA type zinc finger		2	303	6	10660	Over-represented	0.0193074
Zinc finger, GRF-type		1	304	0	10666	Over-represented	0.0278006
C2H2 zinc finger		4	301	39	10627	Over-represented	0.0308917
SSP		1	304	211	10455	Under-represented	0.0325711
High cysteine SSP		0	305	140	10526	Under-represented	0.0349702
Mycosphaerella fijiensis: 277 unique proteinIds in synteny blocks
Annotation term	Description	# proteins in study set with annotation term	# proteins in study set without annotation term	# other proteins with annotation term	# other proteins without annotation term	Over/Under-represented	p-value
GO:0003674	molecular_function	154	123	5077	7753	Over-represented	0.000265528
GO:0005623	cell	77	200	2018	10812	Over-represented	0.000359227
all	all	160	117	5495	7335	Over-represented	0.000359227
GO:0005622	intracellular	55	222	1249	11581	Over-represented	0.000359227
GO:0005575	cellular_component	77	200	2051	10779	Over-represented	0.000359227
GO:0044464	cell part	77	200	2018	10812	Over-represented	0.000359227
GO:0004871	signal transducer activity	9	268	51	12779	Over-represented	0.00125443
GO:0060089	molecular transducer activity	9	268	51	12779	Over-represented	0.00125443
GO:0032991	macromolecular complex	25	252	405	12425	Over-represented	0.00125443
GO:0009987	cellular process	78	199	2253	10577	Over-represented	0.00378257
GO:0005488	binding	94	183	2889	9941	Over-represented	0.0037836
GO:0044424	intracellular part	42	235	1000	11830	Over-represented	0.00859077
GO:0000786	nucleosome	4	273	7	12823	Over-represented	0.0105877
GO:0000785	chromatin	5	272	17	12813	Over-represented	0.0127664
GO:0007154	cell communication	13	264	160	12670	Over-represented	0.0127664
GO:0006334	nucleosome assembly	4	273	9	12821	Over-represented	0.0180256
GO:0007165	signal transduction	12	265	148	12682	Over-represented	0.021177
GO:0030170	pyridoxal phosphate binding	7	270	51	12779	Over-represented	0.0232982
GO:0003676	nucleic acid binding	35	242	835	11995	Over-represented	0.0232982
GO:0016769	transferase activity, transferring nitrogenous groups	5	272	21	12809	Over-represented	0.0232982
GO:0008150	biological_process	113	164	3852	8978	Over-represented	0.0232982
GO:0043234	protein complex	16	261	254	12576	Over-represented	0.0232982
GO:0006333	chromatin assembly or disassembly	5	272	23	12807	Over-represented	0.02801
GO:0031497	chromatin assembly	4	273	14	12816	Over-represented	0.0473132
GO:0044427	chromosomal part	5	272	27	12803	Over-represented	0.0492803
KOG___INFORMATION STORAGE AND PROCESSING		54	223	1266	11564	Over-represented	0.00754459
PF00125	Histone core	4	273	2	12828	Over-represented	0.00691955
Transcription Factor		18	259	266	12564	Over-represented	3.4308e-05
GATA type zinc finger		2	275	4	12826	Over-represented	0.00631097
C2H2 zinc finger		4	273	43	12787	Over-represented	0.0170847
Zinc finger, GRF-type		1	276	0	12830	Over-represented	0.0211337
SART1		1	276	0	12830	Over-represented	0.0211337
