# Supplementary material for: Diverse Lifestyles and Strategies of Plant Pathogenesis Encoded in the Genomes of Eighteen Dothideomycetes Fungi
Source: PLoS Pathog. 2012 Dec 6;8(12):e1003037. doi: 10.1371/journal.ppat.1003037 (PMC3516569; doi:10.1371/journal.ppat.1003037)
Supplement: Table S12 — Additional statistics on the putatively dispensable chromosomes. (XLS) [file ppat.1003037.s021.xls]

## Sheet: Sheet1
Organism	Scaffold / chromosome	Size (bp)	Size excluding gaps (bp)	GC-content (%)	Gaps (%)	Gene count	Gene density (genes / Mbp)	Genes with PFAM (%)	Repeat content (%)
Mycosphaerella graminicola	chr_14	773098	773098	48.4906	0	114	147.459	11.4035	24.8768
	chr_15	639501	639501	51.0041	0	86	134.48	0	21.8369
	chr_16	607044	607044	51.5034	0	88	144.965	2.27273	19.3404
	chr_17	584099	584099	51.995	0	78	133.539	1.28205	9.74869
	chr_18	573698	567701	48.6341	1.04532	64	112.735	4.6875	31.119
	chr_19	549847	549847	51.2895	0	87	158.226	1.14943	17.3186
	chr_20	472105	472105	51.5214	0	79	167.336	1.26582	12.2759
	chr_21	409213	409213	51.9358	0	58	141.735	1.72414	14.1271
Organism	Scaffold / chromosome	Size (bp)	Size excluding gaps (bp)	GC-content (%)	Gaps (%)	Gene count	Gene density (genes / Mbp)	Genes with PFAM (%)	Repeat content (%)
Mycosphaerella fijiensis	scaffold_11	1762310	1755791	40.1965	0.369912	62	35.3117	3.22581	65.9936
	scaffold_13	1121713	1119934	40.9913	0.158597	51	45.5384	0	63.1227
	scaffold_14	1006785	1001523	39.6634	0.522654	37	36.9437	0	60.145
	scaffold_15	928877	924789	41.5881	0.440101	42	45.4158	4.7619	60.7682
	scaffold_16	905553	896994	39.1303	0.945168	2	2.22967	0	76.0218
	scaffold_17	851953	838654	42.119	1.561	65	77.5051	4.61538	31.9663
	scaffold_18	830772	827796	41.6783	0.358221	49	59.1933	2.04082	51.4508
	scaffold_20	594030	590834	41.0794	0.53802	29	49.0832	0	41.9431
	scaffold_21	427043	425210	43.5789	0.429231	40	94.0712	2.5	49.448
	scaffold_22	366261	364423	41.6996	0.501828	30	82.3219	3.33333	53.1303
	scaffold_23	339557	338672	37.5286	0.260634	0	0	0	66.7616
	scaffold_24	325668	320907	38.0528	1.46192	0	0	0	55.2141
	scaffold_25	230844	227877	42.0758	1.28528	1	4.38833	0	12.5107
	scaffold_26	147471	145904	40.9016	1.06258	0	0	0	39.587
Organism	Scaffold / chromosome	Size (bp)	Size excluding gaps (bp)	GC-content (%)	Gaps (%)	Gene count	Gene density (genes / Mbp)	Genes with PFAM (%)	Repeat content (%)
Leptosphaeria maculans	lm_SuperContig_22_v2	731443	730561	35.3498	0.120584	35	47.9084	5.71429	87.949
	lm_SuperContig_29_v2	200940	188922	35.6914	5.98089	7	37.0523	28.5714	94.8153
Organism	Scaffold / chromosome	Size (bp)	Size excluding gaps (bp)	GC-content (%)	Gaps (%)	Gene count	Gene density (genes / Mbp)	Genes with PFAM (%)	Repeat content (%)
Setosphaeria turcica	scaffold_28	114873	74746	41.922	34.9316	7	93.6505	14.2857	72.3236
Organism	Scaffold / chromosome	Size (bp)	Size excluding gaps (bp)	GC-content (%)	Gaps (%)	Gene count	Gene density (genes / Mbp)	Genes with PFAM (%)	Repeat content (%)
Stagonospora nodorum	scaffold_46	142652	142552	28.1357	0.0701007	0	0	0	32.9732
Organism	Scaffold / chromosome	Size (bp)	Size excluding gaps (bp)	GC-content (%)	Gaps (%)	Gene count	Gene density (genes / Mbp)	Genes with PFAM (%)	Repeat content (%)
Cochliobolus heterostrophus C5	scaffold_46	142652	142552	28.1357	0.0701007	0	0	0	32.9732
