# Supplementary material for: Diverse Lifestyles and Strategies of Plant Pathogenesis Encoded in the Genomes of Eighteen Dothideomycetes Fungi
Source: PLoS Pathog. 2012 Dec 6;8(12):e1003037. doi: 10.1371/journal.ppat.1003037 (PMC3516569; doi:10.1371/journal.ppat.1003037)
Supplement: Table S13 — Functional annotation terms that are over- or under-represented in genes of which the product is not part of the core proteome. (XLS) [file ppat.1003037.s022.xls]

## Sheet: non_core_proteins_representatio
Alternaria brassicicola
Annotation term	Description	# proteins in study set with annotation term	# proteins in study set without annotation term	# other proteins with annotation term	# other proteins without annotation term	Over/Under-represented	p-value
Has transmembrane domain		919	5440	961	3368	Under-represented	5.26802e-22
Has signal peptide		598	5761	224	4105	Over-represented	3.69992e-14
SSP		121	6238	18	4311	Over-represented	1.65017e-10
Protease		89	6270	128	4201	Under-represented	3.26826e-06
High cysteine SSP		52	6307	5	4324	Over-represented	1.27342e-05
CAZY: Carbohydrate Esterase		36	6323	2	4327	Over-represented	7.04946e-05
CAZY: Polysaccharide Lyase		23	6336	0	4329	Over-represented	0.000623576
CAZY: Carbohydrate-Binding Module		33	6326	6	4323	Over-represented	0.0424272
all	all	1974	4385	2850	1479	Under-represented	3.84704e-276
GO:0003674	molecular_function	1817	4542	2672	1657	Under-represented	2.10561e-253
GO:0008150	biological_process	1179	5180	1900	2429	Under-represented	6.48322e-173
GO:0003824	catalytic activity	1234	5125	1887	2442	Under-represented	5.67367e-156
GO:0008152	metabolic process	976	5383	1387	2942	Under-represented	2.9229e-88
GO:0009987	cellular process	767	5592	1190	3139	Under-represented	7.63558e-87
GO:0005623	cell	685	5674	1103	3226	Under-represented	1.00112e-84
GO:0044464	cell part	685	5674	1103	3226	Under-represented	1.00112e-84
GO:0051179	localization	133	6226	481	3848	Under-represented	1.26817e-83
GO:0005488	binding	881	5478	1277	3052	Under-represented	5.41271e-83
GO:0051234	establishment of localization	133	6226	478	3851	Under-represented	7.46836e-83
GO:0006810	transport	133	6226	477	3852	Under-represented	1.34496e-82
GO:0005575	cellular_component	723	5636	1109	3220	Under-represented	3.83415e-78
GO:0016020	membrane	205	6154	549	3780	Under-represented	3.36568e-75
GO:0005215	transporter activity	116	6243	419	3910	Under-represented	2.62895e-72
GO:0044237	cellular metabolic process	668	5691	997	3332	Under-represented	4.23271e-65
GO:0016491	oxidoreductase activity	260	6099	550	3779	Under-represented	8.04989e-58
GO:0000166	nucleotide binding	224	6135	496	3833	Under-represented	7.7906e-55
GO:0044425	membrane part	113	6246	351	3978	Under-represented	2.73158e-53
GO:0017076	purine nucleotide binding	211	6148	469	3860	Under-represented	6.96344e-52
GO:0032555	purine ribonucleotide binding	172	6187	413	3916	Under-represented	1.7635e-49
GO:0032553	ribonucleotide binding	172	6187	413	3916	Under-represented	1.7635e-49
GO:0031224	intrinsic to membrane	86	6273	299	4030	Under-represented	1.99312e-49
GO:0016021	integral to membrane	86	6273	299	4030	Under-represented	1.99312e-49
GO:0044238	primary metabolic process	756	5603	990	3339	Under-represented	2.52779e-48
GO:0030554	adenyl nucleotide binding	191	6168	408	3921	Under-represented	1.26474e-42
GO:0043170	macromolecule metabolic process	499	5860	715	3614	Under-represented	9.69829e-41
GO:0022892	substrate-specific transporter activity	79	6280	257	4072	Under-represented	3.37402e-40
GO:0005524	ATP binding	153	6206	352	3977	Under-represented	8.93557e-40
GO:0032559	adenyl ribonucleotide binding	153	6206	352	3977	Under-represented	8.93557e-40
GO:0022857	transmembrane transporter activity	79	6280	256	4073	Under-represented	9.74841e-40
GO:0022804	active transmembrane transporter activity	45	6314	202	4127	Under-represented	4.61497e-39
GO:0016740	transferase activity	257	6102	454	3875	Under-represented	1.77766e-36
GO:0022891	substrate-specific transmembrane transporter activity	76	6283	232	4097	Under-represented	2.88243e-34
GO:0019538	protein metabolic process	299	6060	479	3850	Under-represented	1.07821e-32
GO:0005737	cytoplasm	148	6211	314	4015	Under-represented	5.76539e-32
GO:0044260	cellular macromolecule metabolic process	294	6065	464	3865	Under-represented	8.92336e-31
GO:0044267	cellular protein metabolic process	290	6069	454	3875	Under-represented	1.66116e-29
GO:0005622	intracellular	508	5851	655	3674	Under-represented	9.27735e-29
GO:0016614	oxidoreductase activity, acting on CH-OH group of donors	43	6316	158	4171	Under-represented	9.14534e-27
GO:0015075	ion transmembrane transporter activity	72	6287	190	4139	Under-represented	2.72286e-24
GO:0044424	intracellular part	407	5952	534	3795	Under-represented	5.45783e-24
GO:0016616	oxidoreductase activity, acting on the CH-OH group of donors, NAD or NADP as acceptor	36	6323	130	4199	Under-represented	1.20173e-21
GO:0016462	pyrophosphatase activity	92	6267	203	4126	Under-represented	1.85514e-21
GO:0016817	hydrolase activity, acting on acid anhydrides	94	6265	205	4124	Under-represented	3.13856e-21
GO:0016818	hydrolase activity, acting on acid anhydrides, in phosphorus-containing anhydrides	93	6266	203	4126	Under-represented	3.74571e-21
GO:0044444	cytoplasmic part	111	6248	224	4105	Under-represented	4.57738e-21
GO:0009058	biosynthetic process	184	6175	302	4027	Under-represented	7.01916e-21
GO:0043283	biopolymer metabolic process	315	6044	430	3899	Under-represented	7.01916e-21
GO:0044249	cellular biosynthetic process	140	6219	252	4077	Under-represented	4.08189e-20
GO:0017111	nucleoside-triphosphatase activity	88	6271	189	4140	Under-represented	2.7284e-19
GO:0015291	secondary active transmembrane transporter activity	11	6348	80	4249	Under-represented	4.21285e-19
GO:0016787	hydrolase activity	549	5810	626	3703	Under-represented	5.67053e-19
GO:0016772	transferase activity, transferring phosphorus-containing groups	114	6245	213	4116	Under-represented	4.93366e-18
GO:0006082	organic acid metabolic process	56	6303	145	4184	Under-represented	5.06929e-18
GO:0019752	carboxylic acid metabolic process	55	6304	143	4186	Under-represented	5.52314e-18
GO:0033036	macromolecule localization	23	6336	94	4235	Under-represented	5.36788e-17
GO:0008104	protein localization	23	6336	93	4236	Under-represented	1.83247e-16
GO:0015144	carbohydrate transmembrane transporter activity	4	6355	56	4273	Under-represented	2.84824e-16
GO:0008643	carbohydrate transport	4	6355	56	4273	Under-represented	2.84824e-16
GO:0008565	protein transporter activity	10	6349	69	4260	Under-represented	3.48117e-16
GO:0016301	kinase activity	71	6288	155	4174	Under-represented	4.49538e-16
GO:0045184	establishment of protein localization	23	6336	91	4238	Under-represented	5.6377e-16
GO:0032991	macromolecular complex	169	6190	259	4070	Under-represented	9.24478e-16
GO:0015031	protein transport	23	6336	90	4239	Under-represented	1.01356e-15
GO:0016853	isomerase activity	35	6324	107	4222	Under-represented	1.30851e-15
GO:0015295	solute:hydrogen symporter activity	4	6355	54	4275	Under-represented	1.33491e-15
GO:0005351	sugar:hydrogen symporter activity	4	6355	54	4275	Under-represented	1.33491e-15
GO:0051119	sugar transmembrane transporter activity	4	6355	54	4275	Under-represented	1.33491e-15
GO:0044422	organelle part	59	6300	137	4192	Under-represented	3.52527e-15
GO:0044446	intracellular organelle part	59	6300	137	4192	Under-represented	3.52527e-15
GO:0006807	nitrogen compound metabolic process	58	6301	135	4194	Under-represented	4.0478e-15
GO:0043234	protein complex	99	6260	182	4147	Under-represented	4.86532e-15
GO:0042623	ATPase activity, coupled	54	6305	129	4200	Under-represented	7.65726e-15
GO:0016887	ATPase activity	66	6293	141	4188	Under-represented	2.87458e-14
GO:0008733	L-arabinose isomerase activity	1	6358	42	4287	Under-represented	3.02703e-14
GO:0015405	P-P-bond-hydrolysis-driven transmembrane transporter activity	31	6328	96	4233	Under-represented	3.02703e-14
GO:0015399	primary active transmembrane transporter activity	31	6328	96	4233	Under-represented	3.02703e-14
GO:0016043	cellular component organization and biogenesis	74	6285	150	4179	Under-represented	3.69813e-14
GO:0006520	amino acid metabolic process	44	6315	112	4217	Under-represented	9.61626e-14
GO:0051649	establishment of cellular localization	26	6333	87	4242	Under-represented	1.12635e-13
GO:0051641	cellular localization	27	6332	89	4240	Under-represented	1.13789e-13
GO:0004497	monooxygenase activity	24	6335	84	4245	Under-represented	1.15973e-13
GO:0020037	heme binding	32	6327	95	4234	Under-represented	1.3432e-13
GO:0046906	tetrapyrrole binding	32	6327	95	4234	Under-represented	1.3432e-13
GO:0005515	protein binding	141	6218	219	4110	Under-represented	1.3432e-13
GO:0009308	amine metabolic process	53	6306	122	4207	Under-represented	1.6329e-13
GO:0006519	amino acid and derivative metabolic process	47	6312	114	4215	Under-represented	2.67818e-13
GO:0016773	phosphotransferase activity, alcohol group as acceptor	67	6292	137	4192	Under-represented	3.52949e-13
GO:0043412	biopolymer modification	92	6267	164	4165	Under-represented	5.73958e-13
GO:0008324	cation transmembrane transporter activity	54	6305	121	4208	Under-represented	5.81237e-13
GO:0016820	hydrolase activity, acting on acid anhydrides, catalyzing transmembrane movement of substances	32	6327	92	4237	Under-represented	1.18632e-12
GO:0042626	ATPase activity, coupled to transmembrane movement of substances	31	6328	90	4239	Under-represented	1.26025e-12
GO:0043492	ATPase activity, coupled to movement of substances	31	6328	90	4239	Under-represented	1.26025e-12
GO:0031090	organelle membrane	12	6347	61	4268	Under-represented	1.32293e-12
GO:0015294	solute:cation symporter activity	9	6350	55	4274	Under-represented	2.11969e-12
GO:0015293	symporter activity	9	6350	55	4274	Under-represented	2.11969e-12
GO:0004386	helicase activity	28	6331	85	4244	Under-represented	2.8805e-12
GO:0016861	intramolecular oxidoreductase activity, interconverting aldoses and ketoses	6	6353	48	4281	Under-represented	4.93562e-12
GO:0005506	iron ion binding	26	6333	81	4248	Under-represented	5.81228e-12
GO:0006464	protein modification process	84	6275	150	4179	Under-represented	6.77614e-12
GO:0046907	intracellular transport	26	6333	78	4251	Under-represented	3.12745e-11
GO:0043229	intracellular organelle	324	6035	371	3958	Under-represented	4.6625e-11
GO:0043226	organelle	324	6035	371	3958	Under-represented	4.6625e-11
GO:0007154	cell communication	48	6311	105	4224	Under-represented	4.97117e-11
GO:0008026	ATP-dependent helicase activity	27	6332	79	4250	Under-represented	5.1112e-11
GO:0016860	intramolecular oxidoreductase activity	12	6347	56	4273	Under-represented	5.61136e-11
GO:0043687	post-translational protein modification	71	6288	130	4199	Under-represented	1.05416e-10
GO:0031967	organelle envelope	6	6353	44	4285	Under-represented	1.05684e-10
obsolete_biological_process	obsolete_biological_process	92	6267	150	4179	Under-represented	3.19388e-10
GO:0006118	electron transport	90	6269	148	4181	Under-represented	3.30385e-10
GO:0022884	macromolecule transmembrane transporter activity	8	6351	46	4283	Under-represented	4.06323e-10
GO:0007165	signal transduction	44	6315	97	4232	Under-represented	4.06323e-10
GO:0008320	protein transmembrane transporter activity	8	6351	46	4283	Under-represented	4.06323e-10
GO:0015450	P-P-bond-hydrolysis-driven protein transmembrane transporter activity	8	6351	46	4283	Under-represented	4.06323e-10
GO:0005525	GTP binding	19	6340	63	4266	Under-represented	8.21082e-10
GO:0032561	guanyl ribonucleotide binding	19	6340	63	4266	Under-represented	8.21082e-10
GO:0044429	mitochondrial part	5	6354	39	4290	Under-represented	1.04541e-09
GO:0003678	DNA helicase activity	23	6336	68	4261	Under-represented	1.06816e-09
GO:0004003	ATP-dependent DNA helicase activity	23	6336	68	4261	Under-represented	1.06816e-09
GO:0043167	ion binding	362	5997	392	3937	Under-represented	1.29844e-09
GO:0019001	guanyl nucleotide binding	20	6339	63	4266	Under-represented	1.45796e-09
GO:0005739	mitochondrion	8	6351	44	4285	Under-represented	1.67764e-09
GO:0031975	envelope	9	6350	46	4283	Under-represented	1.68876e-09
GO:0031966	mitochondrial membrane	1	6358	29	4300	Under-represented	1.77197e-09
GO:0016192	vesicle-mediated transport	5	6354	38	4291	Under-represented	2.15769e-09
GO:0065003	macromolecular complex assembly	15	6344	55	4274	Under-represented	2.76152e-09
GO:0046872	metal ion binding	361	5998	387	3942	Under-represented	3.80919e-09
GO:0006886	intracellular protein transport	20	6339	62	4267	Under-represented	4.30189e-09
GO:0003724	RNA helicase activity	8	6351	43	4286	Under-represented	5.74548e-09
GO:0006796	phosphate metabolic process	71	6288	121	4208	Under-represented	5.83494e-09
GO:0006793	phosphorus metabolic process	71	6288	121	4208	Under-represented	5.83494e-09
GO:0009059	macromolecule biosynthetic process	100	6259	151	4178	Under-represented	5.96473e-09
GO:0022607	cellular component assembly	17	6342	56	4273	Under-represented	8.56129e-09
GO:0005740	mitochondrial envelope	3	6356	32	4297	Under-represented	8.70487e-09
GO:0007264	small GTPase mediated signal transduction	14	6345	52	4277	Under-represented	9.6926e-09
GO:0048037	cofactor binding	81	6278	131	4198	Under-represented	9.74961e-09
GO:0009056	catabolic process	47	6312	93	4236	Under-represented	1.27531e-08
GO:0008094	DNA-dependent ATPase activity	27	6332	69	4260	Under-represented	1.5749e-08
GO:0016627	oxidoreductase activity, acting on the CH-CH group of donors	16	6343	54	4275	Under-represented	1.58703e-08
GO:0065009	regulation of molecular function	20	6339	59	4270	Under-represented	2.07105e-08
GO:0042625	ATPase activity, coupled to transmembrane movement of ions	28	6331	69	4260	Under-represented	2.28829e-08
GO:0016874	ligase activity	92	6267	140	4189	Under-represented	2.33376e-08
GO:0043142	single-stranded DNA-dependent ATPase activity	8	6351	40	4289	Under-represented	3.55444e-08
GO:0050790	regulation of catalytic activity	20	6339	58	4271	Under-represented	3.55444e-08
GO:0008186	RNA-dependent ATPase activity	8	6351	40	4289	Under-represented	3.55444e-08
GO:0042624	ATPase activity, uncoupled	8	6351	40	4289	Under-represented	3.55444e-08
GO:0004004	ATP-dependent RNA helicase activity	8	6351	40	4289	Under-represented	3.55444e-08
GO:0015462	protein-transmembrane transporting ATPase activity	8	6351	40	4289	Under-represented	3.55444e-08
GO:0017116	single-stranded DNA-dependent ATP-dependent DNA helicase activity	8	6351	40	4289	Under-represented	3.55444e-08
GO:0044248	cellular catabolic process	42	6317	85	4244	Under-represented	5.14949e-08
GO:0006457	protein folding	8	6351	39	4290	Under-represented	6.87018e-08
GO:0006139	nucleobase, nucleoside, nucleotide and nucleic acid metabolic process	301	6058	324	4005	Under-represented	9.32301e-08
GO:0043169	cation binding	344	6015	359	3970	Under-represented	1.158e-07
GO:0043231	intracellular membrane-bounded organelle	245	6114	274	4055	Under-represented	1.69157e-07
GO:0043227	membrane-bounded organelle	245	6114	274	4055	Under-represented	1.69157e-07
GO:0006865	amino acid transport	3	6356	28	4301	Under-represented	1.9438e-07
GO:0015837	amine transport	3	6356	28	4301	Under-represented	1.9438e-07
GO:0016705	oxidoreductase activity, acting on paired donors, with incorporation or reduction of molecular oxygen	27	6332	63	4266	Under-represented	3.12972e-07
GO:0015849	organic acid transport	4	6355	29	4300	Under-represented	4.20126e-07
GO:0004672	protein kinase activity	58	6301	98	4231	Under-represented	4.20126e-07
GO:0005275	amine transmembrane transporter activity	3	6356	27	4302	Under-represented	4.20126e-07
GO:0015171	amino acid transmembrane transporter activity	3	6356	27	4302	Under-represented	4.20126e-07
GO:0046942	carboxylic acid transport	4	6355	29	4300	Under-represented	4.20126e-07
GO:0009309	amine biosynthetic process	16	6343	48	4281	Under-represented	4.56633e-07
GO:0044271	nitrogen compound biosynthetic process	16	6343	48	4281	Under-represented	4.56633e-07
GO:0019866	organelle inner membrane	1	6358	22	4307	Under-represented	5.82577e-07
GO:0005743	mitochondrial inner membrane	1	6358	22	4307	Under-represented	5.82577e-07
GO:0016310	phosphorylation	64	6295	103	4226	Under-represented	7.57909e-07
obsolete_molecular_function	obsolete_molecular_function	64	6295	103	4226	Under-represented	7.57909e-07
GO:0008652	amino acid biosynthetic process	15	6344	46	4283	Under-represented	8.33453e-07
GO:0016903	oxidoreductase activity, acting on the aldehyde or oxo group of donors	3	6356	26	4303	Under-represented	8.95523e-07
GO:0003676	nucleic acid binding	373	5986	373	3956	Under-represented	1.02707e-06
GO:0005576	extracellular region	38	6321	1	4328	Over-represented	1.05963e-06
GO:0007242	intracellular signaling cascade	25	6334	58	4271	Under-represented	1.13353e-06
GO:0050662	coenzyme binding	58	6301	95	4234	Under-represented	1.26225e-06
GO:0009057	macromolecule catabolic process	27	6332	61	4268	Under-represented	1.26364e-06
GO:0006412	translation	93	6266	130	4199	Under-represented	1.42111e-06
GO:0065007	biological regulation	172	6187	202	4127	Under-represented	1.6237e-06
GO:0016758	transferase activity, transferring hexosyl groups	13	6346	42	4287	Under-represented	1.63154e-06
GO:0043086	negative regulation of catalytic activity	4	6355	27	4302	Under-represented	1.80482e-06
GO:0006974	response to DNA damage stimulus	18	6341	49	4280	Under-represented	1.81393e-06
GO:0006281	DNA repair	18	6341	49	4280	Under-represented	1.81393e-06
GO:0009719	response to endogenous stimulus	18	6341	49	4280	Under-represented	1.81393e-06
GO:0004713	protein-tyrosine kinase activity	30	6329	63	4266	Under-represented	1.87402e-06
GO:0008233	peptidase activity	110	6249	145	4184	Under-represented	2.20051e-06
GO:0044265	cellular macromolecule catabolic process	23	6336	54	4275	Under-represented	2.49349e-06
GO:0016757	transferase activity, transferring glycosyl groups	22	6337	53	4276	Under-represented	2.71201e-06
GO:0006261	DNA-dependent DNA replication	1	6358	20	4309	Under-represented	2.90584e-06
GO:0009055	electron carrier activity	11	6348	38	4291	Under-represented	3.07758e-06
GO:0016836	hydro-lyase activity	10	6349	36	4293	Under-represented	3.45575e-06
GO:0006468	protein amino acid phosphorylation	51	6308	85	4244	Under-represented	3.70026e-06
GO:0050896	response to stimulus	49	6310	82	4247	Under-represented	5.70229e-06
GO:0030234	enzyme regulator activity	45	6314	78	4251	Under-represented	6.12432e-06
GO:0016746	transferase activity, transferring acyl groups	50	6309	83	4246	Under-represented	6.75148e-06
GO:0004316	3-oxoacyl-[acyl-carrier-protein] reductase activity	3	6356	23	4306	Under-represented	8.57458e-06
GO:0007049	cell cycle	11	6348	36	4293	Under-represented	1.00127e-05
GO:0044262	cellular carbohydrate metabolic process	20	6339	48	4281	Under-represented	1.00468e-05
GO:0006732	coenzyme metabolic process	9	6350	33	4296	Under-represented	1.04814e-05
GO:0004312	fatty-acid synthase activity	4	6355	25	4304	Under-represented	1.19666e-05
GO:0010467	gene expression	292	6067	295	4034	Under-represented	1.47892e-05
GO:0016829	lyase activity	56	6303	87	4242	Under-represented	1.72481e-05
GO:0005342	organic acid transmembrane transporter activity	6	6353	28	4301	Under-represented	1.7933e-05
GO:0046943	carboxylic acid transmembrane transporter activity	6	6353	28	4301	Under-represented	1.7933e-05
GO:0016877	ligase activity, forming carbon-sulfur bonds	2	6357	20	4309	Under-represented	1.81482e-05
GO:0022402	cell cycle process	8	6351	31	4298	Under-represented	1.98991e-05
GO:0008194	UDP-glycosyltransferase activity	4	6355	24	4305	Under-represented	2.28568e-05
GO:0004871	signal transducer activity	32	6327	60	4269	Under-represented	2.67318e-05
GO:0060089	molecular transducer activity	32	6327	60	4269	Under-represented	2.67318e-05
GO:0051340	regulation of ligase activity	5	6354	25	4304	Under-represented	2.91693e-05
GO:0006461	protein complex assembly	6	6353	27	4302	Under-represented	3.25017e-05
GO:0046483	heterocycle metabolic process	10	6349	33	4296	Under-represented	3.27507e-05
GO:0006790	sulfur metabolic process	1	6358	17	4312	Under-represented	3.36754e-05
GO:0016620	oxidoreductase activity, acting on the aldehyde or oxo group of donors, NAD or NADP as acceptor	3	6356	21	4308	Under-represented	3.77632e-05
GO:0051186	cofactor metabolic process	14	6345	38	4291	Under-represented	3.81587e-05
GO:0004299	proteasome endopeptidase activity	2	6357	19	4310	Under-represented	3.88781e-05
GO:0051444	negative regulation of ubiquitin-protein ligase activity	4	6355	23	4306	Under-represented	4.19204e-05
GO:0051440	regulation of ubiquitin-protein ligase activity during meiotic cell cycle	4	6355	23	4306	Under-represented	4.19204e-05
GO:0051443	positive regulation of ubiquitin-protein ligase activity	4	6355	23	4306	Under-represented	4.19204e-05
GO:0046914	transition metal ion binding	329	6030	320	4009	Under-represented	4.19204e-05
GO:0051438	regulation of ubiquitin-protein ligase activity	4	6355	23	4306	Under-represented	4.19204e-05
GO:0008135	translation factor activity, nucleic acid binding	4	6355	23	4306	Under-represented	4.19204e-05
GO:0051351	positive regulation of ligase activity	4	6355	23	4306	Under-represented	4.19204e-05
GO:0051352	negative regulation of ligase activity	4	6355	23	4306	Under-represented	4.19204e-05
GO:0045182	translation regulator activity	4	6355	23	4306	Under-represented	4.19204e-05
GO:0004532	exoribonuclease activity	0	6359	14	4315	Under-represented	4.29902e-05
GO:0016896	exoribonuclease activity, producing 5'-phosphomonoesters	0	6359	14	4315	Under-represented	4.29902e-05
GO:0004175	endopeptidase activity	46	6313	74	4255	Under-represented	4.55064e-05
GO:0019787	small conjugating protein ligase activity	11	6348	33	4296	Under-represented	5.36205e-05
GO:0004674	protein serine/threonine kinase activity	40	6319	67	4262	Under-represented	5.36385e-05
GO:0004428	inositol or phosphatidylinositol kinase activity	5	6354	24	4305	Under-represented	5.41469e-05
GO:0019200	carbohydrate kinase activity	6	6353	26	4303	Under-represented	5.58207e-05
GO:0030163	protein catabolic process	14	6345	37	4292	Under-represented	6.11362e-05
GO:0004842	ubiquitin-protein ligase activity	7	6352	27	4302	Under-represented	6.14799e-05
GO:0004298	threonine endopeptidase activity	3	6356	20	4309	Under-represented	7.44943e-05
GO:0016628	oxidoreductase activity, acting on the CH-CH group of donors, NAD or NADP as acceptor	3	6356	20	4309	Under-represented	7.44943e-05
GO:0015297	antiporter activity	2	6357	18	4311	Under-represented	7.96152e-05
GO:0043085	positive regulation of catalytic activity	5	6354	23	4306	Under-represented	0.000106502
GO:0051321	meiotic cell cycle	5	6354	23	4306	Under-represented	0.000106502
GO:0008047	enzyme activator activity	24	6335	48	4281	Under-represented	0.000120215
GO:0043232	intracellular non-membrane-bounded organelle	94	6265	117	4212	Under-represented	0.000129811
GO:0043228	non-membrane-bounded organelle	94	6265	117	4212	Under-represented	0.000129811
GO:0006260	DNA replication	12	6347	33	4296	Under-represented	0.000132453
GO:0030247	polysaccharide binding	22	6337	0	4329	Over-represented	0.000151086
GO:0001871	pattern binding	22	6337	0	4329	Over-represented	0.000151086
GO:0006811	ion transport	42	6317	67	4262	Under-represented	0.000152176
GO:0008415	acyltransferase activity	47	6312	72	4257	Under-represented	0.00015259
GO:0006259	DNA metabolic process	47	6312	72	4257	Under-represented	0.00015259
GO:0043285	biopolymer catabolic process	20	6339	43	4286	Under-represented	0.000163011
GO:0006725	aromatic compound metabolic process	16	6343	37	4292	Under-represented	0.00021597
GO:0006508	proteolysis	106	6253	126	4203	Under-represented	0.000231626
GO:0016747	transferase activity, transferring groups other than amino-acyl groups	48	6311	72	4257	Under-represented	0.000250951
GO:0006396	RNA processing	20	6339	42	4287	Under-represented	0.000256216
GO:0030117	membrane coat	3	6356	19	4310	Under-represented	0.000279672
GO:0048475	coated membrane	3	6356	19	4310	Under-represented	0.000279672
GO:0012505	endomembrane system	10	6349	29	4300	Under-represented	0.00027996
GO:0044255	cellular lipid metabolic process	24	6335	46	4283	Under-represented	0.000283245
GO:0015238	drug transporter activity	1	6358	14	4315	Under-represented	0.000349239
GO:0015893	drug transport	1	6358	14	4315	Under-represented	0.000349239
GO:0050381	unspecific monooxygenase activity	1	6358	14	4315	Under-represented	0.000349239
GO:0042493	response to drug	1	6358	14	4315	Under-represented	0.000349239
GO:0016810	hydrolase activity, acting on carbon-nitrogen (but not peptide) bonds	27	6332	49	4280	Under-represented	0.000349942
GO:0016712	oxidoreductase activity, acting on paired donors, with incorporation or reduction of molecular oxygen, reduced flavin or flavoprotein as one donor, and incorporation of one atom of oxygen	2	6357	16	4313	Under-represented	0.000352585
GO:0003743	translation initiation factor activity	2	6357	16	4313	Under-represented	0.000352585
GO:0016796	exonuclease activity, active with either ribo- or deoxyribonucleic acids and producing 5'-phosphomonoesters	2	6357	16	4313	Under-represented	0.000352585
GO:0022618	protein-RNA complex assembly	2	6357	16	4313	Under-represented	0.000352585
GO:0043774	coenzyme F420-2 alpha-glutamyl ligase activity	32	6327	3	4326	Over-represented	0.000465883
GO:0043773	coenzyme F420-0 gamma-glutamyl ligase activity	32	6327	3	4326	Over-represented	0.000465883
GO:0008766	UDP-N-acetylmuramoylalanyl-D-glutamyl-2,6-diaminopimelate-D-alanyl-D-alanine ligase activity	32	6327	3	4326	Over-represented	0.000465883
GO:0018169	ribosomal S6-glutamic acid ligase activity	32	6327	3	4326	Over-represented	0.000465883
GO:0006913	nucleocytoplasmic transport	3	6356	18	4311	Under-represented	0.000506372
GO:0051169	nuclear transport	3	6356	18	4311	Under-represented	0.000506372
GO:0065008	regulation of biological quality	4	6355	19	4310	Under-represented	0.00056737
GO:0009064	glutamine family amino acid metabolic process	6	6353	22	4307	Under-represented	0.000621127
GO:0051246	regulation of protein metabolic process	7	6352	24	4305	Under-represented	0.000621127
GO:0005996	monosaccharide metabolic process	12	6347	30	4299	Under-represented	0.000633388
GO:0003723	RNA binding	33	6326	54	4275	Under-represented	0.000690758
GO:0016878	acid-thiol ligase activity	2	6357	15	4314	Under-represented	0.000742794
GO:0006413	translational initiation	2	6357	15	4314	Under-represented	0.000742794
GO:0006752	group transfer coenzyme metabolic process	1	6358	13	4316	Under-represented	0.000751077
GO:0009063	amino acid catabolic process	1	6358	13	4316	Under-represented	0.000751077
GO:0044257	cellular protein catabolic process	13	6346	31	4298	Under-represented	0.000829682
GO:0043632	modification-dependent macromolecule catabolic process	13	6346	31	4298	Under-represented	0.000829682
GO:0006511	ubiquitin-dependent protein catabolic process	13	6346	31	4298	Under-represented	0.000829682
GO:0051603	proteolysis involved in cellular protein catabolic process	13	6346	31	4298	Under-represented	0.000829682
GO:0019941	modification-dependent protein catabolic process	13	6346	31	4298	Under-represented	0.000829682
GO:0006066	alcohol metabolic process	18	6341	37	4292	Under-represented	0.000866246
GO:0004033	aldo-keto reductase activity	3	6356	17	4312	Under-represented	0.000932675
GO:0005509	calcium ion binding	15	6344	33	4296	Under-represented	0.000968956
GO:0022613	ribonucleoprotein complex biogenesis and assembly	7	6352	23	4306	Under-represented	0.00104932
GO:0035004	phosphoinositide 3-kinase activity	4	6355	18	4311	Under-represented	0.00105603
GO:0000287	magnesium ion binding	4	6355	18	4311	Under-represented	0.00105603
GO:0046903	secretion	4	6355	18	4311	Under-represented	0.00105603
GO:0032940	secretion by cell	4	6355	18	4311	Under-represented	0.00105603
GO:0008483	transaminase activity	4	6355	18	4311	Under-represented	0.00105603
GO:0016788	hydrolase activity, acting on ester bonds	136	6223	147	4182	Under-represented	0.00108199
GO:0001727	lipid kinase activity	6	6353	21	4308	Under-represented	0.00108661
GO:0005829	cytosol	6	6353	21	4308	Under-represented	0.00108661
GO:0044445	cytosolic part	6	6353	21	4308	Under-represented	0.00108661
GO:0016769	transferase activity, transferring nitrogenous groups	5	6354	20	4309	Under-represented	0.00108816
GO:0019318	hexose metabolic process	11	6348	28	4301	Under-represented	0.00108816
GO:0005198	structural molecule activity	63	6296	82	4247	Under-represented	0.00114345
GO:0016070	RNA metabolic process	170	6189	175	4154	Under-represented	0.00116201
GO:0015980	energy derivation by oxidation of organic compounds	0	6359	10	4319	Under-represented	0.00119641
GO:0009112	nucleobase metabolic process	0	6359	10	4319	Under-represented	0.00119641
GO:0030170	pyridoxal phosphate binding	10	6349	26	4303	Under-represented	0.00133761
GO:0016779	nucleotidyltransferase activity	36	6323	55	4274	Under-represented	0.0014718
GO:0043413	biopolymer glycosylation	1	6358	12	4317	Under-represented	0.00157902
GO:0051082	unfolded protein binding	7	6352	22	4307	Under-represented	0.00175376
GO:0032787	monocarboxylic acid metabolic process	7	6352	22	4307	Under-represented	0.00175376
GO:0050660	FAD binding	38	6321	56	4273	Under-represented	0.00195847
GO:0046527	glucosyltransferase activity	4	6355	17	4312	Under-represented	0.00198703
GO:0035251	UDP-glucosyltransferase activity	4	6355	17	4312	Under-represented	0.00198703
GO:0045045	secretory pathway	4	6355	17	4312	Under-represented	0.00198703
GO:0055086	nucleobase, nucleoside and nucleotide metabolic process	27	6332	45	4284	Under-represented	0.00238859
GO:0016651	oxidoreductase activity, acting on NADH or NADPH	9	6350	24	4305	Under-represented	0.00240206
GO:0004534	5'-3' exoribonuclease activity	0	6359	9	4320	Under-represented	0.00276701
GO:0006298	mismatch repair	0	6359	9	4320	Under-represented	0.00276701
GO:0008610	lipid biosynthetic process	14	6345	30	4299	Under-represented	0.00276701
GO:0003690	double-stranded DNA binding	0	6359	9	4320	Under-represented	0.00276701
GO:0000175	3'-5'-exoribonuclease activity	0	6359	9	4320	Under-represented	0.00276701
GO:0008409	5'-3' exonuclease activity	0	6359	9	4320	Under-represented	0.00276701
GO:0045005	maintenance of fidelity during DNA-dependent DNA replication	0	6359	9	4320	Under-represented	0.00276701
GO:0000096	sulfur amino acid metabolic process	0	6359	9	4320	Under-represented	0.00276701
GO:0030983	mismatched DNA binding	0	6359	9	4320	Under-represented	0.00276701
GO:0044272	sulfur compound biosynthetic process	0	6359	9	4320	Under-represented	0.00276701
GO:0004448	isocitrate dehydrogenase activity	2	6357	13	4316	Under-represented	0.00297421
GO:0015299	solute:hydrogen antiporter activity	2	6357	13	4316	Under-represented	0.00297421
GO:0015298	solute:cation antiporter activity	2	6357	13	4316	Under-represented	0.00297421
GO:0009310	amine catabolic process	2	6357	13	4316	Under-represented	0.00297421
GO:0030529	ribonucleoprotein complex	72	6287	87	4242	Under-represented	0.00297421
GO:0044270	nitrogen compound catabolic process	2	6357	13	4316	Under-represented	0.00297421
GO:0015300	solute:solute antiporter activity	2	6357	13	4316	Under-represented	0.00297421
GO:0006950	response to stress	42	6317	59	4270	Under-represented	0.00297641
GO:0008375	acetylglucosaminyltransferase activity	3	6356	15	4314	Under-represented	0.00310908
GO:0042895	antibiotic transporter activity	1	6358	11	4318	Under-represented	0.00327809
GO:0015520	tetracycline:hydrogen antiporter activity	1	6358	11	4318	Under-represented	0.00327809
GO:0015307	drug:hydrogen antiporter activity	1	6358	11	4318	Under-represented	0.00327809
GO:0015904	tetracycline transport	1	6358	11	4318	Under-represented	0.00327809
GO:0008493	tetracycline transporter activity	1	6358	11	4318	Under-represented	0.00327809
GO:0004518	nuclease activity	30	6329	47	4282	Under-represented	0.00360891
GO:0042592	homeostatic process	4	6355	16	4313	Under-represented	0.00361083
GO:0016866	intramolecular transferase activity	4	6355	16	4313	Under-represented	0.00361083
GO:0016661	oxidoreductase activity, acting on other nitrogenous compounds as donors	4	6355	16	4313	Under-represented	0.00361083
GO:0044428	nuclear part	17	6342	33	4296	Under-represented	0.00362272
GO:0042578	phosphoric ester hydrolase activity	40	6319	56	4273	Under-represented	0.00449435
GO:0016879	ligase activity, forming carbon-nitrogen bonds	56	6303	71	4258	Under-represented	0.00449435
GO:0016835	carbon-oxygen lyase activity	25	6334	41	4288	Under-represented	0.00506174
GO:0005057	receptor signaling protein activity	13	6346	27	4302	Under-represented	0.00539857
GO:0019842	vitamin binding	23	6336	38	4291	Under-represented	0.00542535
GO:0030295	protein kinase activator activity	17	6342	32	4297	Under-represented	0.00547086
GO:0019887	protein kinase regulator activity	19	6340	34	4295	Under-represented	0.00547086
GO:0016709	oxidoreductase activity, acting on paired donors, with incorporation or reduction of molecular oxygen, NADH or NADPH as one donor, and incorporation of one atom of oxygen	17	6342	32	4297	Under-represented	0.00547086
GO:0003924	GTPase activity	10	6349	24	4305	Under-represented	0.00547086
GO:0019207	kinase regulator activity	19	6340	34	4295	Under-represented	0.00547086
GO:0019209	kinase activator activity	17	6342	32	4297	Under-represented	0.00547086
GO:0019725	cellular homeostasis	3	6356	14	4315	Under-represented	0.00573648
GO:0009084	glutamine family amino acid biosynthetic process	3	6356	14	4315	Under-represented	0.00573648
GO:0045454	cell redox homeostasis	3	6356	14	4315	Under-represented	0.00573648
GO:0019113	limonene monooxygenase activity	5	6354	17	4312	Under-represented	0.00579537
GO:0005839	proteasome core complex	2	6357	12	4317	Under-represented	0.00588996
GO:0016405	CoA-ligase activity	2	6357	12	4317	Under-represented	0.00588996
GO:0005794	Golgi apparatus	2	6357	12	4317	Under-represented	0.00588996
GO:0006996	organelle organization and biogenesis	34	6325	49	4280	Under-represented	0.00590281
GO:0019867	outer membrane	0	6359	8	4321	Under-represented	0.00602578
GO:0030118	clathrin coat	0	6359	8	4321	Under-represented	0.00602578
GO:0006084	acetyl-CoA metabolic process	0	6359	8	4321	Under-represented	0.00602578
GO:0004029	aldehyde dehydrogenase (NAD) activity	0	6359	8	4321	Under-represented	0.00602578
GO:0006887	exocytosis	0	6359	8	4321	Under-represented	0.00602578
GO:0016782	transferase activity, transferring sulfur-containing groups	0	6359	8	4321	Under-represented	0.00602578
GO:0008443	phosphofructokinase activity	4	6355	15	4314	Under-represented	0.006614
GO:0004090	carbonyl reductase (NADPH) activity	1	6358	10	4319	Under-represented	0.00678612
GO:0043566	structure-specific DNA binding	1	6358	10	4319	Under-represented	0.00678612
GO:0015103	inorganic anion transmembrane transporter activity	1	6358	10	4319	Under-represented	0.00678612
GO:0003887	DNA-directed DNA polymerase activity	8	6351	21	4308	Under-represented	0.00728208
GO:0004222	metalloendopeptidase activity	7	6352	19	4310	Under-represented	0.00822422
GO:0005083	small GTPase regulator activity	10	6349	23	4306	Under-represented	0.00846991
GO:0018588	tri-n-butyltin dioxygenase activity	5	6354	16	4313	Under-represented	0.00956256
GO:0018589	di-n-butyltin dioxygenase activity	5	6354	16	4313	Under-represented	0.00956256
GO:0018586	mono-butyltin dioxygenase activity	5	6354	16	4313	Under-represented	0.00956256
GO:0018585	fluorene oxygenase activity	5	6354	16	4313	Under-represented	0.00956256
GO:0043823	spheroidene monooxygenase activity	5	6354	16	4313	Under-represented	0.00956256
GO:0009108	coenzyme biosynthetic process	5	6354	16	4313	Under-represented	0.00956256
GO:0004673	protein histidine kinase activity	6	6353	18	4311	Under-represented	0.00956256
GO:0018600	alpha-pinene dehydrogenase activity	5	6354	16	4313	Under-represented	0.00956256
GO:0018599	2-hydroxyisobutyrate 3-monooxygenase activity	5	6354	16	4313	Under-represented	0.00956256
GO:0018598	hydroxymethylsilanetriol oxidase activity	5	6354	16	4313	Under-represented	0.00956256
GO:0018591	methyl tertiary butyl ether 3-monooxygenase activity	5	6354	16	4313	Under-represented	0.00956256
GO:0018590	methylsilanetriol hydroxylase activity	5	6354	16	4313	Under-represented	0.00956256
GO:0018593	4-chlorophenoxyacetate monooxygenase activity	5	6354	16	4313	Under-represented	0.00956256
GO:0018592	4-nitrocatechol 4-monooxygenase activity	5	6354	16	4313	Under-represented	0.00956256
GO:0018595	alpha-pinene monooxygenase activity	5	6354	16	4313	Under-represented	0.00956256
GO:0018594	tert-butyl alcohol 2-monooxygenase activity	5	6354	16	4313	Under-represented	0.00956256
GO:0018597	ammonia monooxygenase activity	5	6354	16	4313	Under-represented	0.00956256
GO:0018596	dimethylsilanediol hydroxylase activity	5	6354	16	4313	Under-represented	0.00956256
GO:0018587	limonene 8-monooxygenase activity	5	6354	16	4313	Under-represented	0.00956256
GO:0016765	transferase activity, transferring alkyl or aryl (other than methyl) groups	14	6345	27	4302	Under-represented	0.00956256
GO:0016775	phosphotransferase activity, nitrogenous group as acceptor	6	6353	18	4311	Under-represented	0.00956256
GO:0000155	two-component sensor activity	6	6353	18	4311	Under-represented	0.00956256
GO:0016051	carbohydrate biosynthetic process	5	6354	16	4313	Under-represented	0.00956256
GO:0016307	phosphatidylinositol phosphate kinase activity	5	6354	16	4313	Under-represented	0.00956256
GO:0009072	aromatic amino acid family metabolic process	5	6354	16	4313	Under-represented	0.00956256
GO:0006767	water-soluble vitamin metabolic process	5	6354	16	4313	Under-represented	0.00956256
GO:0006766	vitamin metabolic process	5	6354	16	4313	Under-represented	0.00956256
GO:0009110	vitamin biosynthetic process	3	6356	13	4316	Under-represented	0.00989631
GO:0042364	water-soluble vitamin biosynthetic process	3	6356	13	4316	Under-represented	0.00989631
GO:0004576	oligosaccharyl transferase activity	3	6356	13	4316	Under-represented	0.00989631
GO:0006512	ubiquitin cycle	3	6356	13	4316	Under-represented	0.00989631
GO:0008812	choline dehydrogenase activity	3	6356	13	4316	Under-represented	0.00989631
GO:0016791	phosphoric monoester hydrolase activity	28	6331	42	4287	Under-represented	0.00989631
GO:0006399	tRNA metabolic process	28	6331	42	4287	Under-represented	0.00989631
GO:0008061	chitin binding	13	6346	0	4329	Over-represented	0.00991623
GO:0050789	regulation of biological process	155	6204	152	4177	Under-represented	0.0105351
GO:0030695	GTPase regulator activity	13	6346	26	4303	Under-represented	0.0113623
GO:0022406	membrane docking	0	6359	7	4322	Under-represented	0.012354
GO:0046394	carboxylic acid biosynthetic process	0	6359	7	4322	Under-represented	0.012354
GO:0006633	fatty acid biosynthetic process	0	6359	7	4322	Under-represented	0.012354
GO:0030662	coated vesicle membrane	0	6359	7	4322	Under-represented	0.012354
GO:0009109	coenzyme catabolic process	0	6359	7	4322	Under-represented	0.012354
GO:0012506	vesicle membrane	0	6359	7	4322	Under-represented	0.012354
GO:0030659	cytoplasmic vesicle membrane	0	6359	7	4322	Under-represented	0.012354
GO:0030120	vesicle coat	0	6359	7	4322	Under-represented	0.012354
GO:0004249	stromelysin 3 activity	0	6359	7	4322	Under-represented	0.012354
GO:0030135	coated vesicle	0	6359	7	4322	Under-represented	0.012354
GO:0030258	lipid modification	0	6359	7	4322	Under-represented	0.012354
GO:0048278	vesicle docking	0	6359	7	4322	Under-represented	0.012354
GO:0008319	prenyl protein specific endopeptidase activity	0	6359	7	4322	Under-represented	0.012354
GO:0009060	aerobic respiration	0	6359	7	4322	Under-represented	0.012354
GO:0046112	nucleobase biosynthetic process	0	6359	7	4322	Under-represented	0.012354
GO:0031982	vesicle	0	6359	7	4322	Under-represented	0.012354
GO:0031988	membrane-bounded vesicle	0	6359	7	4322	Under-represented	0.012354
GO:0031968	organelle outer membrane	0	6359	7	4322	Under-represented	0.012354
GO:0005798	Golgi-associated vesicle	0	6359	7	4322	Under-represented	0.012354
GO:0031410	cytoplasmic vesicle	0	6359	7	4322	Under-represented	0.012354
GO:0006270	DNA replication initiation	0	6359	7	4322	Under-represented	0.012354
GO:0016023	cytoplasmic membrane-bounded vesicle	0	6359	7	4322	Under-represented	0.012354
GO:0044433	cytoplasmic vesicle part	0	6359	7	4322	Under-represented	0.012354
GO:0008133	collagenase activity	0	6359	7	4322	Under-represented	0.012354
GO:0016053	organic acid biosynthetic process	0	6359	7	4322	Under-represented	0.012354
GO:0005741	mitochondrial outer membrane	0	6359	7	4322	Under-represented	0.012354
GO:0018193	peptidyl-amino acid modification	7	6352	18	4311	Under-represented	0.012354
GO:0030402	matrilysin-2 activity	0	6359	7	4322	Under-represented	0.012354
GO:0006099	tricarboxylic acid cycle	0	6359	7	4322	Under-represented	0.012354
GO:0045333	cellular respiration	0	6359	7	4322	Under-represented	0.012354
GO:0044275	cellular carbohydrate catabolic process	10	6349	22	4307	Under-represented	0.012354
GO:0046356	acetyl-CoA catabolic process	0	6359	7	4322	Under-represented	0.012354
GO:0004725	protein tyrosine phosphatase activity	1	6358	9	4320	Under-represented	0.0128042
GO:0016646	oxidoreductase activity, acting on the CH-NH group of donors, NAD or NADP as acceptor	1	6358	9	4320	Under-represented	0.0128042
GO:0006629	lipid metabolic process	52	6307	63	4266	Under-represented	0.0146915
GO:0006812	cation transport	38	6321	50	4279	Under-represented	0.0147251
GO:0046677	response to antibiotic	5	6354	15	4314	Under-represented	0.0157154
GO:0005840	ribosome	61	6298	71	4258	Under-represented	0.0157154
GO:0003735	structural constituent of ribosome	61	6298	71	4258	Under-represented	0.0157154
GO:0009966	regulation of signal transduction	11	6348	23	4306	Under-represented	0.0160731
GO:0017110	nucleoside-diphosphatase activity	15	6344	27	4302	Under-represented	0.0161681
GO:0051188	cofactor biosynthetic process	8	6351	19	4310	Under-represented	0.0169928
GO:0000502	proteasome complex	3	6356	12	4317	Under-represented	0.0172707
GO:0016229	steroid dehydrogenase activity	4	6355	14	4315	Under-represented	0.0172707
GO:0031965	nuclear membrane	3	6356	12	4317	Under-represented	0.0172707
GO:0046930	pore complex	3	6356	12	4317	Under-represented	0.0172707
GO:0005643	nuclear pore	3	6356	12	4317	Under-represented	0.0172707
GO:0005635	nuclear envelope	3	6356	12	4317	Under-represented	0.0172707
GO:0044453	nuclear membrane part	3	6356	12	4317	Under-represented	0.0172707
GO:0004024	alcohol dehydrogenase activity, zinc-dependent	4	6355	14	4315	Under-represented	0.0172707
GO:0004025	alcohol dehydrogenase activity, iron-dependent	4	6355	14	4315	Under-represented	0.0172707
GO:0004022	alcohol dehydrogenase activity	4	6355	14	4315	Under-represented	0.0172707
GO:0004023	alcohol dehydrogenase activity, metal ion-independent	4	6355	14	4315	Under-represented	0.0172707
GO:0015923	mannosidase activity	4	6355	14	4315	Under-represented	0.0172707
GO:0016408	C-acyltransferase activity	2	6357	11	4318	Under-represented	0.0173069
GO:0044431	Golgi apparatus part	2	6357	11	4318	Under-represented	0.0173069
GO:0033765	steroid dehydrogenase activity, acting on the CH-CH group of donors	2	6357	11	4318	Under-represented	0.0173069
GO:0000252	C-3 sterol dehydrogenase (C-4 sterol decarboxylase) activity	2	6357	11	4318	Under-represented	0.0173069
GO:0008796	bis(5'-nucleosyl)-tetraphosphatase activity	16	6343	28	4301	Under-represented	0.0193804
GO:0004551	nucleotide diphosphatase activity	16	6343	28	4301	Under-represented	0.0193804
GO:0006007	glucose catabolic process	7	6352	17	4312	Under-represented	0.0201937
GO:0019320	hexose catabolic process	7	6352	17	4312	Under-represented	0.0201937
GO:0046365	monosaccharide catabolic process	7	6352	17	4312	Under-represented	0.0201937
GO:0018106	peptidyl-histidine phosphorylation	6	6353	16	4313	Under-represented	0.0228544
GO:0000160	two-component signal transduction system (phosphorelay)	6	6353	16	4313	Under-represented	0.0228544
GO:0010181	FMN binding	6	6353	16	4313	Under-represented	0.0228544
GO:0018202	peptidyl-histidine modification	6	6353	16	4313	Under-represented	0.0228544
GO:0043141	ATP-dependent 5'-3' DNA helicase activity	15	6344	26	4303	Under-represented	0.0230752
GO:0004527	exonuclease activity	11	6348	22	4307	Under-represented	0.0230752
GO:0008758	UDP-2,3-diacylglucosamine hydrolase activity	15	6344	26	4303	Under-represented	0.0230752
GO:0047429	nucleoside-triphosphate diphosphatase activity	15	6344	26	4303	Under-represented	0.0230752
GO:0051056	regulation of small GTPase mediated signal transduction	11	6348	22	4307	Under-represented	0.0230752
GO:0004787	thiamin-pyrophosphatase activity	15	6344	26	4303	Under-represented	0.0230752
GO:0042027	cyclophilin-type peptidyl-prolyl cis-trans isomerase activity	11	6348	22	4307	Under-represented	0.0230752
GO:0004600	cyclophilin	11	6348	22	4307	Under-represented	0.0230752
GO:0008234	cysteine-type peptidase activity	22	6337	33	4296	Under-represented	0.0230752
GO:0016859	cis-trans isomerase activity	11	6348	22	4307	Under-represented	0.0230752
GO:0016052	carbohydrate catabolic process	11	6348	22	4307	Under-represented	0.0230752
GO:0003755	peptidyl-prolyl cis-trans isomerase activity	11	6348	22	4307	Under-represented	0.0230752
GO:0008413	8-oxo-7,8-dihydroguanine triphosphatase activity	15	6344	26	4303	Under-represented	0.0230752
GO:0004716	receptor signaling protein tyrosine kinase activity	13	6346	24	4305	Under-represented	0.0230752
GO:0019176	dihydroneopterin monophosphate phosphatase activity	15	6344	26	4303	Under-represented	0.0230752
GO:0019177	dihydroneopterin triphosphate pyrophosphohydrolase activity	15	6344	26	4303	Under-represented	0.0230752
GO:0030051	FK506-sensitive peptidyl-prolyl cis-trans isomerase	11	6348	22	4307	Under-represented	0.0230752
GO:0008828	dATP pyrophosphohydrolase activity	15	6344	26	4303	Under-represented	0.0230752
GO:0000810	diacylglycerol pyrophosphate phosphatase activity	15	6344	26	4303	Under-represented	0.0230752
GO:0043139	5'-3' DNA helicase activity	15	6344	26	4303	Under-represented	0.0230752
GO:0045229	external encapsulating structure organization and biogenesis	11	6348	0	4329	Over-represented	0.025239
GO:0030570	pectate lyase activity	11	6348	0	4329	Over-represented	0.025239
GO:0007047	cell wall organization and biogenesis	11	6348	0	4329	Over-represented	0.025239
GO:0006289	nucleotide-excision repair	1	6358	8	4321	Under-represented	0.0252446
GO:0004571	mannosyl-oligosaccharide 1,2-alpha-mannosidase activity	1	6358	8	4321	Under-represented	0.0252446
GO:0016207	4-coumarate-CoA ligase activity	1	6358	8	4321	Under-represented	0.0252446
GO:0015924	mannosyl-oligosaccharide mannosidase activity	1	6358	8	4321	Under-represented	0.0252446
GO:0004727	prenylated protein tyrosine phosphatase activity	1	6358	8	4321	Under-represented	0.0252446
GO:0016811	hydrolase activity, acting on carbon-nitrogen (but not peptide) bonds, in linear amides	8	6351	18	4311	Under-represented	0.0254277
GO:0015662	ATPase activity, coupled to transmembrane movement of ions, phosphorylative mechanism	8	6351	18	4311	Under-represented	0.0254277
GO:0043648	dicarboxylic acid metabolic process	5	6354	14	4315	Under-represented	0.0254343
GO:0051128	regulation of cellular component organization and biogenesis	0	6359	6	4323	Under-represented	0.0258344
GO:0006560	proline metabolic process	0	6359	6	4323	Under-represented	0.0258344
GO:0030131	clathrin adaptor complex	0	6359	6	4323	Under-represented	0.0258344
GO:0048193	Golgi vesicle transport	0	6359	6	4323	Under-represented	0.0258344
GO:0006904	vesicle docking during exocytosis	0	6359	6	4323	Under-represented	0.0258344
GO:0009065	glutamine family amino acid catabolic process	0	6359	6	4323	Under-represented	0.0258344
GO:0015645	fatty-acid ligase activity	0	6359	6	4323	Under-represented	0.0258344
GO:0030119	AP-type membrane coat adaptor complex	0	6359	6	4323	Under-represented	0.0258344
GO:0000097	sulfur amino acid biosynthetic process	0	6359	6	4323	Under-represented	0.0258344
GO:0032268	regulation of cellular protein metabolic process	0	6359	6	4323	Under-represented	0.0258344
GO:0006144	purine base metabolic process	0	6359	6	4323	Under-represented	0.0258344
GO:0004100	chitin synthase activity	0	6359	6	4323	Under-represented	0.0258344
GO:0015939	pantothenate metabolic process	0	6359	6	4323	Under-represented	0.0258344
GO:0006555	methionine metabolic process	0	6359	6	4323	Under-represented	0.0258344
GO:0004559	alpha-mannosidase activity	0	6359	6	4323	Under-represented	0.0258344
GO:0042556	eukaryotic elongation factor-2 kinase regulator activity	4	6355	13	4316	Under-represented	0.0266603
GO:0042557	eukaryotic elongation factor-2 kinase activator activity	4	6355	13	4316	Under-represented	0.0266603
GO:0008607	phosphorylase kinase regulator activity	4	6355	13	4316	Under-represented	0.0266603
GO:0043841	(S)-lactate 2-kinase activity	4	6355	13	4316	Under-represented	0.0266603
GO:0043771	cytidine kinase activity	4	6355	13	4316	Under-represented	0.0266603
GO:0018720	phenol kinase activity	4	6355	13	4316	Under-represented	0.0266603
GO:0043743	LPPG:FO 2-phospho-L-lactate transferase activity	4	6355	13	4316	Under-represented	0.0266603
GO:0051731	polynucleotide kinase activity	4	6355	13	4316	Under-represented	0.0266603
GO:0051734	ATP-dependent polynucleotide kinase activity	4	6355	13	4316	Under-represented	0.0266603
GO:0051735	GTP-dependent polynucleotide kinase activity	4	6355	13	4316	Under-represented	0.0266603
GO:0019914	cyclin-dependent protein kinase activating kinase regulator activity	4	6355	13	4316	Under-represented	0.0266603
GO:0043798	glycerate 2-kinase activity	4	6355	13	4316	Under-represented	0.0266603
GO:0032942	inositol tetrakisphosphate 2-kinase activity	4	6355	13	4316	Under-represented	0.0266603
GO:0033764	steroid dehydrogenase activity, acting on the CH-OH group of donors, NAD or NADP as acceptor	4	6355	13	4316	Under-represented	0.0266603
GO:0051765	inositol tetrakisphosphate kinase activity	4	6355	13	4316	Under-represented	0.0266603
GO:0008819	cobinamide kinase activity	4	6355	13	4316	Under-represented	0.0266603
GO:0016662	oxidoreductase activity, acting on other nitrogenous compounds as donors, cytochrome as acceptor	4	6355	13	4316	Under-represented	0.0266603
GO:0006631	fatty acid metabolic process	3	6356	11	4318	Under-represented	0.0280022
GO:0043623	cellular protein complex assembly	2	6357	10	4319	Under-represented	0.0280022
GO:0043713	(R)-2-hydroxyisocaproate dehydrogenase activity	2	6357	10	4319	Under-represented	0.0280022
GO:0008408	3'-5' exonuclease activity	2	6357	10	4319	Under-represented	0.0280022
GO:0051990	(R)-2-hydroxyglutarate dehydrogenase activity	2	6357	10	4319	Under-represented	0.0280022
GO:0048258	3-ketoglucose-reductase activity	2	6357	10	4319	Under-represented	0.0280022
GO:0018453	2-hydroxytetrahydrofuran dehydrogenase activity	2	6357	10	4319	Under-represented	0.0280022
GO:0032442	phenylcoumaran benzylic ether reductase activity	2	6357	10	4319	Under-represented	0.0280022
GO:0008875	gluconate dehydrogenase activity	3	6356	11	4318	Under-represented	0.0280022
GO:0051170	nuclear import	2	6357	10	4319	Under-represented	0.0280022
GO:0018451	epoxide dehydrogenase activity	2	6357	10	4319	Under-represented	0.0280022
GO:0018452	5-exo-hydroxycamphor dehydrogenase activity	2	6357	10	4319	Under-represented	0.0280022
GO:0004495	mevaldate reductase activity	2	6357	10	4319	Under-represented	0.0280022
GO:0006606	protein import into nucleus	2	6357	10	4319	Under-represented	0.0280022
GO:0000253	3-keto sterol reductase activity	2	6357	10	4319	Under-represented	0.0280022
GO:0009123	nucleoside monophosphate metabolic process	3	6356	11	4318	Under-represented	0.0280022
GO:0009124	nucleoside monophosphate biosynthetic process	3	6356	11	4318	Under-represented	0.0280022
GO:0030246	carbohydrate binding	26	6333	5	4324	Over-represented	0.0292959
GO:0016830	carbon-carbon lyase activity	17	6342	27	4302	Under-represented	0.0300742
GO:0004721	phosphoprotein phosphatase activity	13	6346	23	4306	Under-represented	0.0318682
GO:0004540	ribonuclease activity	13	6346	23	4306	Under-represented	0.0318682
GO:0000156	two-component response regulator activity	6	6353	15	4314	Under-represented	0.0334205
GO:0009165	nucleotide biosynthetic process	18	6341	28	4301	Under-represented	0.0341376
GO:0046164	alcohol catabolic process	8	6351	17	4312	Under-represented	0.0381338
GO:0006006	glucose metabolic process	10	6349	19	4310	Under-represented	0.0406242
GO:0007010	cytoskeleton organization and biogenesis	10	6349	19	4310	Under-represented	0.0406242
GO:0006096	glycolysis	5	6354	13	4316	Under-represented	0.0411601
GO:0016538	cyclin-dependent protein kinase regulator activity	5	6354	13	4316	Under-represented	0.0411601
GO:0008509	anion transmembrane transporter activity	5	6354	13	4316	Under-represented	0.0411601
GO:0006820	anion transport	4	6355	12	4317	Under-represented	0.0452003
GO:0016667	oxidoreductase activity, acting on sulfur group of donors	4	6355	12	4317	Under-represented	0.0452003
GO:0004707	MAP kinase activity	13	6346	22	4307	Under-represented	0.0482911
GO:0004702	receptor signaling protein serine/threonine kinase activity	13	6346	22	4307	Under-represented	0.0482911
GO:0009100	glycoprotein metabolic process	1	6358	7	4322	Under-represented	0.0485047
GO:0009101	glycoprotein biosynthetic process	1	6358	7	4322	Under-represented	0.0485047
GO:0015085	calcium ion transmembrane transporter activity	1	6358	7	4322	Under-represented	0.0485047
GO:0016813	hydrolase activity, acting on carbon-nitrogen (but not peptide) bonds, in linear amidines	1	6358	7	4322	Under-represented	0.0485047
GO:0006486	protein amino acid glycosylation	1	6358	7	4322	Under-represented	0.0485047
GO:0046912	transferase activity, transferring acyl groups, acyl groups converted into alkyl on transfer	1	6358	7	4322	Under-represented	0.0485047
GO:0051187	cofactor catabolic process	1	6358	7	4322	Under-represented	0.0485047
GO:0016717	oxidoreductase activity, acting on paired donors, with oxidation of a pair of donors resulting in the reduction of molecular oxygen to two molecules of water	1	6358	7	4322	Under-represented	0.0485047
GO:0015931	nucleobase, nucleoside, nucleotide and nucleic acid transport	1	6358	7	4322	Under-represented	0.0485047
GO:0005388	calcium-transporting ATPase activity	1	6358	7	4322	Under-represented	0.0485047
GO:0007265	Ras protein signal transduction	9	6350	18	4311	Under-represented	0.0486689
GO:0046578	regulation of Ras protein signal transduction	9	6350	18	4311	Under-represented	0.0486689
GO:0006605	protein targeting	9	6350	18	4311	Under-represented	0.0486689
KOG___METABOLISM		649	5710	1260	3069	Under-represented	1.07359e-132
KOG___POORLY CHARACTERIZED		609	5750	824	3505	Under-represented	5.41378e-41
KOG___General function prediction only		432	5927	645	3684	Under-represented	1.34942e-38
KOG___Amino acid transport and metabolism		66	6293	212	4117	Under-represented	1.08324e-31
KOG0254___Predicted transporter (major facilitator superfamily)		5	6354	93	4236	Under-represented	5.88e-28
KOG___Secondary metabolites biosynthesis, transport and catabolism		61	6298	177	4152	Under-represented	8.1884e-24
KOG___Intracellular trafficking, secretion, and vesicular transport		86	6273	199	4130	Under-represented	2.71644e-21
KOG___Energy production and conversion		86	6273	192	4137	Under-represented	8.45746e-20
KOG___CELLULAR PROCESSES AND SIGNALING		740	5619	777	3552	Under-represented	3.31211e-17
KOG___Posttranslational modification, protein turnover, chaperones		166	6193	264	4065	Under-represented	1.78066e-16
KOG___Translation, ribosomal structure and biogenesis		128	6231	217	4112	Under-represented	5.31587e-15
KOG___Lipid transport and metabolism		86	6273	170	4159	Under-represented	8.41874e-15
KOG___Replication, recombination and repair		61	6298	120	4209	Under-represented	5.01949e-10
KOG0725___Reductases with broad range of substrate specificities		8	6351	48	4281	Under-represented	7.54581e-10
KOG0255___Synaptic vesicle transporter SVOP and related transporters (major facilitator superfamily)		6	6353	44	4285	Under-represented	7.69713e-10
KOG2533___Permease of the major facilitator superfamily		6	6353	43	4286	Under-represented	1.57972e-09
KOG___INFORMATION STORAGE AND PROCESSING		674	5685	652	3677	Under-represented	1.91007e-09
KOG1216___von Willebrand factor and related coagulation proteins		65	6294	4	4325	Over-represented	1.36171e-08
KOG___Carbohydrate transport and metabolism		146	6213	196	4133	Under-represented	4.04373e-08
KOG___Coenzyme transport and metabolism		21	6338	61	4268	Under-represented	7.9199e-08
KOG1187___Serine/threonine protein kinase		51	6308	4	4325	Over-represented	6.39671e-06
KOG0156___Cytochrome P450 CYP2 subfamily		3	6356	25	4304	Under-represented	1.56283e-05
KOG___Defense mechanisms		110	6249	28	4301	Over-represented	6.31905e-05
KOG4701___Chitinase		28	6331	0	4329	Over-represented	7.54253e-05
KOG0023___Alcohol dehydrogenase, class V		0	6359	15	4314	Under-represented	0.000158158
KOG___Inorganic ion transport and metabolism		71	6288	99	4230	Under-represented	0.000336089
KOG___Nucleotide transport and metabolism		23	6336	48	4281	Under-represented	0.000519557
KOG0158___Cytochrome P450 CYP3/CYP5/CYP6/CYP9 subfamilies		3	6356	20	4309	Under-represented	0.000629303
KOG1869___Splicing coactivator SRm160/300, subunit SRm300		60	6299	11	4318	Over-represented	0.000769875
KOG___Signal transduction mechanisms		155	6204	172	4157	Under-represented	0.000769875
KOG4157___beta-1,6-N-acetylglucosaminyltransferase, contains WSC domain		40	6319	4	4325	Over-represented	0.000769875
KOG1286___Amino acid transporters		0	6359	13	4316	Under-represented	0.000769875
KOG1238___Glucose dehydrogenase/choline dehydrogenase/mandelonitrile lyase (GMC oxidoreductase family)		3	6356	19	4310	Under-represented	0.002166
KOG1289___Amino acid transporters		1	6358	13	4316	Under-represented	0.00622149
KOG___Cell cycle control, cell division, chromosome partitioning		89	6270	105	4224	Under-represented	0.0103439
KOG0024___Sorbitol dehydrogenase		1	6358	12	4317	Under-represented	0.0131741
KOG1577___Aldo/keto reductase family proteins		1	6358	12	4317	Under-represented	0.0131741
KOG___Function unknown		177	6182	179	4150	Under-represented	0.0147203
KOG1237___H+/oligopeptide symporter		0	6359	9	4320	Under-represented	0.0231817
KOG0161___Myosin class II heavy chain		29	6330	4	4325	Over-represented	0.0432388
PF00083	General substrate transporter	4	6355	70	4259	Under-represented	6.80412e-20
PF00400	G-protein beta WD-40 repeat	18	6341	79	4250	Under-represented	1.92309e-13
PF00106	Short-chain dehydrogenase/reductase SDR	24	6335	74	4255	Under-represented	1.33458e-09
PF00067	Cytochrome P450	11	6348	52	4277	Under-represented	6.16172e-09
PF00271	Helicase, C-terminal	14	6345	51	4278	Under-represented	2.81758e-07
PF00107	Zinc-containing alcohol dehydrogenase superfamily	11	6348	41	4288	Under-represented	9.7223e-06
PF00069	Protein kinase	26	6333	58	4271	Under-represented	3.68228e-05
PF00270	DEAD/DEAH box helicase, N-terminal	9	6350	35	4294	Under-represented	4.40931e-05
PF00004	AAA ATPase, central region	5	6354	27	4302	Under-represented	9.71812e-05
PF00005	ABC transporter-like	7	6352	30	4299	Under-represented	0.000116088
PF00071	Ras GTPase	2	6357	20	4309	Under-represented	0.000202382
PF00171	Aldehyde dehydrogenase	2	6357	18	4311	Under-represented	0.000940896
PF01399	Proteasome component region PCI	0	6359	13	4316	Under-represented	0.00106787
PF00153	Mitochondrial substrate carrier	8	6351	28	4301	Under-represented	0.00106787
PF00324	Amino acid permease-associated region	3	6356	19	4310	Under-represented	0.00266715
PF00248	Aldo/keto reductase	3	6356	19	4310	Under-represented	0.00266715
PF00501	AMP-dependent synthetase and ligase	8	6351	26	4303	Under-represented	0.00298058
PF05199	GMC oxidoreductase	2	6357	15	4314	Under-represented	0.00688935
PF00732	Glucose-methanol-choline oxidoreductase	3	6356	16	4313	Under-represented	0.0157885
PF00664	ABC transporter, transmembrane region	3	6356	16	4313	Under-represented	0.0157885
PF00179	Ubiquitin-conjugating enzymes	4	6355	17	4312	Under-represented	0.0169703
PF00176	SNF2-related	4	6355	17	4312	Under-represented	0.0169703
PF00108	Thiolase	0	6359	9	4320	Under-represented	0.0234681
Baudoinia compniacensis
Annotation term	Description	# proteins in study set with annotation term	# proteins in study set without annotation term	# other proteins with annotation term	# other proteins without annotation term	Over/Under-represented	p-value
Has transmembrane domain		854	5682	872	3105	Under-represented	2.75041e-29
Protease		66	6470	118	3859	Under-represented	7.52495e-11
SSP		60	6476	7	3970	Over-represented	7.76419e-05
Secreted protease		5	6531	23	3954	Under-represented	0.000283067
High cysteine SSP		27	6509	1	3976	Over-represented	0.00266737
MER102730 (i-AAA peptidase (Dasypus novemcinctus) )		0	6536	9	3968	Under-represented	0.00828272
CAZY: Glycosyltransferase		36	6500	48	3929	Under-represented	0.0178403
CAZY: Carbohydrate Esterase		17	6519	0	3977	Over-represented	0.0209493
CAZY		143	6393	129	3848	Under-represented	0.0419713
GO:0003674	molecular_function	1998	4538	2773	1204	Under-represented	0
all	all	2153	4383	2961	1016	Under-represented	0
GO:0008150	biological_process	1337	5199	2118	1859	Under-represented	1.63092e-258
GO:0003824	catalytic activity	1297	5239	1943	2034	Under-represented	2.79854e-208
GO:0005488	binding	1062	5474	1552	2425	Under-represented	4.48416e-145
GO:0008152	metabolic process	1104	5432	1585	2392	Under-represented	6.74826e-145
GO:0005623	cell	728	5808	1179	2798	Under-represented	8.42015e-120
GO:0044464	cell part	728	5808	1179	2798	Under-represented	8.42015e-120
GO:0009987	cellular process	841	5695	1272	2705	Under-represented	2.2537e-118
GO:0005575	cellular_component	751	5785	1186	2791	Under-represented	3.94402e-116
GO:0044237	cellular metabolic process	726	5810	1062	2915	Under-represented	2.36462e-89
GO:0051179	localization	155	6381	482	3495	Under-represented	5.27507e-87
GO:0051234	establishment of localization	155	6381	478	3499	Under-represented	1.44362e-85
GO:0006810	transport	155	6381	477	3500	Under-represented	2.56053e-85
GO:0016020	membrane	221	6315	554	3423	Under-represented	1.89977e-84
GO:0044238	primary metabolic process	720	5816	1033	2944	Under-represented	1.23017e-83
GO:0005215	transporter activity	115	6421	411	3566	Under-represented	3.79453e-81
GO:0000166	nucleotide binding	196	6340	513	3464	Under-represented	6.10123e-81
GO:0017076	purine nucleotide binding	180	6356	481	3496	Under-represented	7.59538e-77
GO:0016491	oxidoreductase activity	285	6251	556	3421	Under-represented	6.52909e-65
GO:0030554	adenyl nucleotide binding	162	6374	419	3558	Under-represented	1.84683e-64
GO:0032555	purine ribonucleotide binding	161	6375	416	3561	Under-represented	6.63304e-64
GO:0032553	ribonucleotide binding	161	6375	416	3561	Under-represented	6.63304e-64
GO:0043170	macromolecule metabolic process	527	6009	760	3217	Under-represented	7.98426e-59
GO:0044425	membrane part	136	6400	359	3618	Under-represented	8.48401e-56
GO:0032559	adenyl ribonucleotide binding	143	6393	355	3622	Under-represented	4.44156e-52
GO:0005524	ATP binding	143	6393	354	3623	Under-represented	7.99358e-52
GO:0016021	integral to membrane	108	6428	308	3669	Under-represented	9.2253e-51
GO:0031224	intrinsic to membrane	109	6427	309	3668	Under-represented	1.53994e-50
GO:0005622	intracellular	551	5985	737	3240	Under-represented	3.27593e-49
GO:0022892	substrate-specific transporter activity	67	6469	247	3730	Under-represented	9.81892e-49
GO:0022857	transmembrane transporter activity	66	6470	235	3742	Under-represented	3.56201e-45
GO:0044424	intracellular part	428	6108	609	3368	Under-represented	1.20416e-44
GO:0019538	protein metabolic process	293	6243	476	3501	Under-represented	1.0704e-42
GO:0022891	substrate-specific transmembrane transporter activity	64	6472	217	3760	Under-represented	3.43761e-40
GO:0022804	active transmembrane transporter activity	40	6496	181	3796	Under-represented	5.90222e-40
GO:0016740	transferase activity	292	6244	463	3514	Under-represented	8.15481e-40
GO:0005737	cytoplasm	158	6378	325	3652	Under-represented	6.32482e-39
GO:0044260	cellular macromolecule metabolic process	289	6247	454	3523	Under-represented	1.6979e-38
GO:0044267	cellular protein metabolic process	286	6250	447	3530	Under-represented	1.4403e-37
GO:0016787	hydrolase activity	510	6026	627	3350	Under-represented	4.35487e-34
GO:0016614	oxidoreductase activity, acting on CH-OH group of donors	58	6478	183	3794	Under-represented	3.95887e-32
GO:0043283	biopolymer metabolic process	345	6191	472	3505	Under-represented	2.92168e-31
GO:0015075	ion transmembrane transporter activity	60	6476	181	3796	Under-represented	1.60393e-30
GO:0016462	pyrophosphatase activity	82	6454	206	3771	Under-represented	8.78765e-30
GO:0016818	hydrolase activity, acting on acid anhydrides, in phosphorus-containing anhydrides	83	6453	206	3771	Under-represented	1.24744e-29
GO:0016817	hydrolase activity, acting on acid anhydrides	83	6453	206	3771	Under-represented	1.24744e-29
GO:0017111	nucleoside-triphosphatase activity	78	6458	196	3781	Under-represented	1.60662e-28
GO:0016616	oxidoreductase activity, acting on the CH-OH group of donors, NAD or NADP as acceptor	52	6484	157	3820	Under-represented	1.7824e-26
GO:0009058	biosynthetic process	192	6344	307	3670	Under-represented	4.42184e-26
GO:0032991	macromolecular complex	170	6366	283	3694	Under-represented	1.6663e-25
GO:0048037	cofactor binding	71	6465	177	3800	Under-represented	2.51774e-25
GO:0044444	cytoplasmic part	117	6419	228	3749	Under-represented	3.67841e-25
GO:0043234	protein complex	98	6438	205	3772	Under-represented	1.45879e-24
GO:0006082	organic acid metabolic process	60	6476	158	3819	Under-represented	6.82641e-24
GO:0016772	transferase activity, transferring phosphorus-containing groups	118	6418	222	3755	Under-represented	1.54755e-23
GO:0016853	isomerase activity	26	6510	111	3866	Under-represented	2.00826e-23
GO:0019752	carboxylic acid metabolic process	60	6476	156	3821	Under-represented	3.64839e-23
GO:0008565	protein transporter activity	8	6528	77	3900	Under-represented	1.31544e-22
GO:0043229	intracellular organelle	343	6193	423	3554	Under-represented	2.37114e-22
GO:0043226	organelle	343	6193	423	3554	Under-represented	2.37114e-22
GO:0016043	cellular component organization and biogenesis	91	6445	185	3792	Under-represented	1.73519e-21
GO:0044249	cellular biosynthetic process	156	6380	250	3727	Under-represented	3.65338e-21
GO:0016887	ATPase activity	58	6478	145	3832	Under-represented	8.43039e-21
GO:0008104	protein localization	23	6513	98	3879	Under-represented	8.72674e-21
GO:0015291	secondary active transmembrane transporter activity	8	6528	72	3905	Under-represented	9.70075e-21
GO:0033036	macromolecule localization	25	6511	99	3878	Under-represented	4.05602e-20
GO:0045184	establishment of protein localization	23	6513	95	3882	Under-represented	1.20925e-19
GO:0042623	ATPase activity, coupled	50	6486	131	3846	Under-represented	1.37691e-19
GO:0015031	protein transport	23	6513	94	3883	Under-represented	2.32465e-19
GO:0005515	protein binding	193	6343	276	3701	Under-represented	2.57195e-19
GO:0016860	intramolecular oxidoreductase activity	6	6530	63	3914	Under-represented	6.41399e-19
GO:0016861	intramolecular oxidoreductase activity, interconverting aldoses and ketoses	3	6533	56	3921	Under-represented	6.57218e-19
GO:0044422	organelle part	83	6453	165	3812	Under-represented	1.33023e-18
GO:0044446	intracellular organelle part	83	6453	165	3812	Under-represented	1.33023e-18
GO:0016301	kinase activity	79	6457	160	3817	Under-represented	1.80272e-18
GO:0006520	amino acid metabolic process	48	6488	124	3853	Under-represented	1.92092e-18
GO:0050662	coenzyme binding	52	6484	128	3849	Under-represented	3.35599e-18
GO:0004386	helicase activity	25	6511	93	3884	Under-represented	3.83034e-18
GO:0008733	L-arabinose isomerase activity	1	6535	48	3929	Under-represented	5.76997e-18
GO:0016874	ligase activity	73	6463	151	3826	Under-represented	6.12188e-18
GO:0008324	cation transmembrane transporter activity	41	6495	114	3863	Under-represented	7.12484e-18
GO:0006519	amino acid and derivative metabolic process	52	6484	126	3851	Under-represented	1.65625e-17
GO:0043231	intracellular membrane-bounded organelle	269	6267	332	3645	Under-represented	2.45737e-17
GO:0043227	membrane-bounded organelle	269	6267	332	3645	Under-represented	2.45737e-17
GO:0051641	cellular localization	32	6504	100	3877	Under-represented	2.45737e-17
GO:0008026	ATP-dependent helicase activity	23	6513	87	3890	Under-represented	2.9819e-17
GO:0051649	establishment of cellular localization	31	6505	98	3879	Under-represented	4.93e-17
GO:0003678	DNA helicase activity	19	6517	80	3897	Under-represented	6.96254e-17
GO:0004003	ATP-dependent DNA helicase activity	19	6517	80	3897	Under-represented	6.96254e-17
GO:0008094	DNA-dependent ATPase activity	21	6515	83	3894	Under-represented	8.0888e-17
GO:0009308	amine metabolic process	59	6477	130	3847	Under-represented	1.38714e-16
GO:0043412	biopolymer modification	94	6442	168	3809	Under-represented	1.61613e-16
GO:0016773	phosphotransferase activity, alcohol group as acceptor	72	6464	143	3834	Under-represented	3.81533e-16
GO:0006139	nucleobase, nucleoside, nucleotide and nucleic acid metabolic process	314	6222	362	3615	Under-represented	4.02402e-16
GO:0006807	nitrogen compound metabolic process	80	6456	149	3828	Under-represented	1.38875e-15
GO:0051119	sugar transmembrane transporter activity	3	6533	47	3930	Under-represented	2.02772e-15
GO:0006464	protein modification process	87	6449	154	3823	Under-represented	4.92558e-15
GO:0015295	solute:hydrogen symporter activity	3	6533	46	3931	Under-represented	4.92558e-15
GO:0005351	sugar:hydrogen symporter activity	3	6533	46	3931	Under-represented	4.92558e-15
GO:0015144	carbohydrate transmembrane transporter activity	4	6532	48	3929	Under-represented	6.32169e-15
GO:0008643	carbohydrate transport	4	6532	48	3929	Under-represented	6.32169e-15
GO:0003676	nucleic acid binding	387	6149	412	3565	Under-represented	7.34552e-15
GO:0046907	intracellular transport	31	6505	89	3888	Under-represented	2.22406e-14
GO:0043687	post-translational protein modification	68	6468	131	3846	Under-represented	2.77412e-14
GO:0015405	P-P-bond-hydrolysis-driven transmembrane transporter activity	32	6504	89	3888	Under-represented	3.7995e-14
GO:0015399	primary active transmembrane transporter activity	32	6504	89	3888	Under-represented	3.7995e-14
GO:0065009	regulation of molecular function	24	6512	77	3900	Under-represented	1.19447e-13
GO:0050790	regulation of catalytic activity	23	6513	75	3902	Under-represented	2.27871e-13
GO:0015294	solute:cation symporter activity	5	6531	46	3931	Under-represented	2.27871e-13
GO:0015293	symporter activity	5	6531	46	3931	Under-represented	2.27871e-13
GO:0022884	macromolecule transmembrane transporter activity	7	6529	49	3928	Under-represented	4.4423e-13
GO:0042626	ATPase activity, coupled to transmembrane movement of substances	31	6505	84	3893	Under-represented	4.4423e-13
GO:0016820	hydrolase activity, acting on acid anhydrides, catalyzing transmembrane movement of substances	31	6505	84	3893	Under-represented	4.4423e-13
GO:0008320	protein transmembrane transporter activity	7	6529	49	3928	Under-represented	4.4423e-13
GO:0043492	ATPase activity, coupled to movement of substances	31	6505	84	3893	Under-represented	4.4423e-13
GO:0006886	intracellular protein transport	20	6516	70	3907	Under-represented	4.4423e-13
GO:0015450	P-P-bond-hydrolysis-driven protein transmembrane transporter activity	7	6529	49	3928	Under-represented	4.4423e-13
GO:0003724	RNA helicase activity	6	6530	47	3930	Under-represented	4.90036e-13
GO:0007154	cell communication	50	6486	106	3871	Under-represented	5.74163e-13
GO:0020037	heme binding	24	6512	74	3903	Under-represented	8.06241e-13
GO:0046906	tetrapyrrole binding	24	6512	74	3903	Under-represented	8.06241e-13
GO:0019001	guanyl nucleotide binding	19	6517	66	3911	Under-represented	3.28169e-12
GO:0031090	organelle membrane	23	6513	70	3907	Under-represented	5.39592e-12
GO:0043142	single-stranded DNA-dependent ATPase activity	6	6530	44	3933	Under-represented	5.79074e-12
GO:0008186	RNA-dependent ATPase activity	6	6530	44	3933	Under-represented	5.79074e-12
GO:0042624	ATPase activity, uncoupled	6	6530	44	3933	Under-represented	5.79074e-12
GO:0005525	GTP binding	19	6517	65	3912	Under-represented	5.79074e-12
GO:0004004	ATP-dependent RNA helicase activity	6	6530	44	3933	Under-represented	5.79074e-12
GO:0015462	protein-transmembrane transporting ATPase activity	6	6530	44	3933	Under-represented	5.79074e-12
GO:0032561	guanyl ribonucleotide binding	19	6517	65	3912	Under-represented	5.79074e-12
GO:0017116	single-stranded DNA-dependent ATP-dependent DNA helicase activity	6	6530	44	3933	Under-represented	5.79074e-12
GO:0050660	FAD binding	19	6517	64	3913	Under-represented	1.04391e-11
GO:0043167	ion binding	388	6148	390	3587	Under-represented	1.27253e-11
GO:0046872	metal ion binding	387	6149	386	3591	Under-represented	3.36895e-11
GO:0009056	catabolic process	47	6489	96	3881	Under-represented	3.56676e-11
GO:0006796	phosphate metabolic process	68	6468	117	3860	Under-represented	4.77494e-11
GO:0006793	phosphorus metabolic process	68	6468	117	3860	Under-represented	4.77494e-11
GO:0007165	signal transduction	48	6488	96	3881	Under-represented	4.88274e-11
obsolete_molecular_function	obsolete_molecular_function	59	6477	107	3870	Under-represented	8.58859e-11
GO:0065003	macromolecular complex assembly	21	6515	63	3914	Under-represented	1.1698e-10
GO:0008233	peptidase activity	92	6444	138	3839	Under-represented	1.69701e-10
GO:0022607	cellular component assembly	24	6512	66	3911	Under-represented	1.79365e-10
GO:0043169	cation binding	359	6177	357	3620	Under-represented	2.816e-10
GO:0005506	iron ion binding	28	6508	70	3907	Under-represented	3.39206e-10
GO:0004672	protein kinase activity	57	6479	101	3876	Under-represented	5.67484e-10
GO:0010467	gene expression	310	6226	317	3660	Under-represented	6.11353e-10
GO:0004497	monooxygenase activity	37	6499	79	3898	Under-represented	1.11623e-09
obsolete_biological_process	obsolete_biological_process	115	6421	154	3823	Under-represented	1.62435e-09
GO:0016310	phosphorylation	60	6476	102	3875	Under-represented	1.74276e-09
GO:0016627	oxidoreductase activity, acting on the CH-CH group of donors	23	6513	61	3916	Under-represented	2.11703e-09
GO:0044248	cellular catabolic process	44	6492	85	3892	Under-represented	2.14465e-09
GO:0042625	ATPase activity, coupled to transmembrane movement of ions	29	6507	68	3909	Under-represented	2.62042e-09
GO:0009059	macromolecule biosynthetic process	105	6431	144	3833	Under-represented	2.62042e-09
GO:0006468	protein amino acid phosphorylation	44	6492	84	3893	Under-represented	3.57075e-09
GO:0016903	oxidoreductase activity, acting on the aldehyde or oxo group of donors	3	6533	30	3947	Under-represented	5.93468e-09
GO:0006118	electron transport	115	6421	151	3826	Under-represented	6.67231e-09
GO:0007264	small GTPase mediated signal transduction	16	6520	51	3926	Under-represented	6.89267e-09
GO:0030234	enzyme regulator activity	49	6487	88	3889	Under-represented	7.73862e-09
GO:0006865	amino acid transport	0	6536	22	3955	Under-represented	1.00949e-08
GO:0015837	amine transport	0	6536	22	3955	Under-represented	1.00949e-08
GO:0006066	alcohol metabolic process	22	6514	56	3921	Under-represented	2.39897e-08
GO:0065007	biological regulation	233	6303	245	3732	Under-represented	2.56081e-08
GO:0015171	amino acid transmembrane transporter activity	0	6536	21	3956	Under-represented	2.61245e-08
GO:0005275	amine transmembrane transporter activity	0	6536	21	3956	Under-represented	2.61245e-08
GO:0009057	macromolecule catabolic process	28	6508	62	3915	Under-represented	4.72279e-08
GO:0006259	DNA metabolic process	39	6497	74	3903	Under-represented	6.58547e-08
GO:0004713	protein-tyrosine kinase activity	34	6502	68	3909	Under-represented	7.08855e-08
GO:0016620	oxidoreductase activity, acting on the aldehyde or oxo group of donors, NAD or NADP as acceptor	2	6534	25	3952	Under-represented	7.35404e-08
GO:0044262	cellular carbohydrate metabolic process	17	6519	48	3929	Under-represented	7.5545e-08
GO:0016192	vesicle-mediated transport	15	6521	46	3931	Under-represented	8.55688e-08
GO:0007242	intracellular signaling cascade	27	6509	60	3917	Under-represented	8.88706e-08
GO:0006457	protein folding	10	6526	39	3938	Under-represented	9.17795e-08
GO:0016879	ligase activity, forming carbon-nitrogen bonds	44	6492	78	3899	Under-represented	9.28034e-08
GO:0004175	endopeptidase activity	41	6495	75	3902	Under-represented	1.06786e-07
GO:0006790	sulfur metabolic process	1	6535	22	3955	Under-represented	1.35038e-07
GO:0004316	3-oxoacyl-[acyl-carrier-protein] reductase activity	1	6535	22	3955	Under-represented	1.35038e-07
GO:0005634	nucleus	229	6307	236	3741	Under-represented	1.59705e-07
GO:0016829	lyase activity	57	6479	90	3887	Under-represented	1.59835e-07
GO:0004222	metalloendopeptidase activity	0	6536	19	3958	Under-represented	1.67437e-07
GO:0006261	DNA-dependent DNA replication	0	6536	19	3958	Under-represented	1.67437e-07
GO:0016788	hydrolase activity, acting on ester bonds	132	6404	157	3820	Under-represented	2.01992e-07
GO:0006461	protein complex assembly	6	6530	31	3946	Under-represented	2.0851e-07
GO:0031975	envelope	17	6519	47	3930	Under-represented	2.22794e-07
GO:0008237	metallopeptidase activity	16	6520	45	3932	Under-represented	2.41182e-07
GO:0019842	vitamin binding	24	6512	55	3922	Under-represented	2.41182e-07
GO:0006260	DNA replication	10	6526	37	3940	Under-represented	3.0191e-07
GO:0044429	mitochondrial part	14	6522	42	3935	Under-represented	3.0191e-07
GO:0016705	oxidoreductase activity, acting on paired donors, with incorporation or reduction of molecular oxygen	35	6501	66	3911	Under-represented	3.77604e-07
GO:0008047	enzyme activator activity	30	6506	61	3916	Under-represented	3.78471e-07
GO:0031967	organelle envelope	17	6519	46	3931	Under-represented	3.79048e-07
GO:0050896	response to stimulus	49	6487	80	3897	Under-represented	4.17836e-07
GO:0016070	RNA metabolic process	206	6330	214	3763	Under-represented	4.25963e-07
GO:0031966	mitochondrial membrane	6	6530	30	3947	Under-represented	4.39152e-07
GO:0005739	mitochondrion	20	6516	49	3928	Under-represented	4.44695e-07
GO:0004871	signal transducer activity	36	6500	67	3910	Under-represented	4.62825e-07
GO:0060089	molecular transducer activity	36	6500	67	3910	Under-represented	4.62825e-07
GO:0043232	intracellular non-membrane-bounded organelle	94	6442	121	3856	Under-represented	5.36685e-07
GO:0043228	non-membrane-bounded organelle	94	6442	121	3856	Under-represented	5.36685e-07
GO:0006508	proteolysis	94	6442	121	3856	Under-represented	5.36685e-07
GO:0006412	translation	95	6441	122	3855	Under-represented	5.89628e-07
GO:0008652	amino acid biosynthetic process	18	6518	46	3931	Under-represented	5.92034e-07
GO:0016796	exonuclease activity, active with either ribo- or deoxyribonucleic acids and producing 5'-phosphomonoesters	1	6535	20	3957	Under-represented	7.57781e-07
GO:0009309	amine biosynthetic process	20	6516	48	3929	Under-represented	7.67919e-07
GO:0044271	nitrogen compound biosynthetic process	20	6516	48	3929	Under-represented	7.67919e-07
GO:0004312	fatty-acid synthase activity	3	6533	24	3953	Under-represented	8.41379e-07
GO:0006913	nucleocytoplasmic transport	3	6533	24	3953	Under-represented	8.41379e-07
GO:0016877	ligase activity, forming carbon-sulfur bonds	3	6533	24	3953	Under-represented	8.41379e-07
GO:0051169	nuclear transport	3	6533	24	3953	Under-represented	8.41379e-07
GO:0015849	organic acid transport	2	6534	22	3955	Under-represented	8.69646e-07
GO:0046942	carboxylic acid transport	2	6534	22	3955	Under-represented	8.69646e-07
GO:0046914	transition metal ion binding	339	6197	312	3665	Under-represented	1.02995e-06
GO:0006281	DNA repair	18	6518	45	3932	Under-represented	1.04476e-06
GO:0005743	mitochondrial inner membrane	4	6532	25	3952	Under-represented	1.5941e-06
GO:0019866	organelle inner membrane	4	6532	25	3952	Under-represented	1.5941e-06
GO:0006996	organelle organization and biogenesis	44	6492	72	3905	Under-represented	1.84138e-06
GO:0044255	cellular lipid metabolic process	24	6512	51	3926	Under-represented	1.91406e-06
GO:0006629	lipid metabolic process	37	6499	65	3912	Under-represented	2.26866e-06
GO:0006974	response to DNA damage stimulus	19	6517	45	3932	Under-represented	2.51841e-06
GO:0009719	response to endogenous stimulus	19	6517	45	3932	Under-represented	2.51841e-06
GO:0016712	oxidoreductase activity, acting on paired donors, with incorporation or reduction of molecular oxygen, reduced flavin or flavoprotein as one donor, and incorporation of one atom of oxygen	0	6536	16	3961	Under-represented	2.54193e-06
GO:0050381	unspecific monooxygenase activity	0	6536	16	3961	Under-represented	2.54193e-06
GO:0043086	negative regulation of catalytic activity	5	6531	26	3951	Under-represented	2.63586e-06
GO:0051340	regulation of ligase activity	6	6530	28	3949	Under-represented	3.22064e-06
GO:0030170	pyridoxal phosphate binding	12	6524	36	3941	Under-represented	3.24968e-06
GO:0004674	protein serine/threonine kinase activity	46	6490	73	3904	Under-represented	4.08115e-06
GO:0044265	cellular macromolecule catabolic process	27	6509	53	3924	Under-represented	4.53401e-06
GO:0004527	exonuclease activity	5	6531	25	3952	Under-represented	5.59027e-06
GO:0003677	DNA binding	209	6327	208	3769	Under-represented	5.59027e-06
GO:0051352	negative regulation of ligase activity	5	6531	25	3952	Under-represented	5.59027e-06
GO:0051444	negative regulation of ubiquitin-protein ligase activity	5	6531	25	3952	Under-represented	5.59027e-06
GO:0051440	regulation of ubiquitin-protein ligase activity during meiotic cell cycle	5	6531	25	3952	Under-represented	5.59027e-06
GO:0051443	positive regulation of ubiquitin-protein ligase activity	5	6531	25	3952	Under-represented	5.59027e-06
GO:0051438	regulation of ubiquitin-protein ligase activity	5	6531	25	3952	Under-represented	5.59027e-06
GO:0051351	positive regulation of ligase activity	5	6531	25	3952	Under-represented	5.59027e-06
GO:0005975	carbohydrate metabolic process	91	6445	112	3865	Under-represented	7.19908e-06
GO:0019200	carbohydrate kinase activity	8	6528	29	3948	Under-represented	8.02184e-06
GO:0016779	nucleotidyltransferase activity	31	6505	56	3921	Under-represented	8.09428e-06
GO:0016757	transferase activity, transferring glycosyl groups	33	6503	58	3919	Under-represented	8.28542e-06
GO:0015297	antiporter activity	3	6533	21	3956	Under-represented	9.51145e-06
GO:0006396	RNA processing	28	6508	53	3924	Under-represented	9.51145e-06
GO:0004532	exoribonuclease activity	1	6535	17	3960	Under-represented	1.007e-05
GO:0004090	carbonyl reductase (NADPH) activity	1	6535	17	3960	Under-represented	1.007e-05
GO:0016896	exoribonuclease activity, producing 5'-phosphomonoesters	1	6535	17	3960	Under-represented	1.007e-05
GO:0017110	nucleoside-diphosphatase activity	13	6523	36	3941	Under-represented	1.007e-05
GO:0043883	malolactic enzyme activity	7	6529	27	3950	Under-represented	1.26435e-05
GO:0043826	sulfur oxygenase reductase activity	7	6529	27	3950	Under-represented	1.26435e-05
GO:0051341	regulation of oxidoreductase activity	7	6529	27	3950	Under-represented	1.26435e-05
GO:0043738	F420H2 dehydrogenase activity	7	6529	27	3950	Under-represented	1.26435e-05
GO:0019787	small conjugating protein ligase activity	10	6526	31	3946	Under-represented	1.32225e-05
GO:0008796	bis(5'-nucleosyl)-tetraphosphatase activity	14	6522	36	3941	Under-represented	1.49704e-05
GO:0004551	nucleotide diphosphatase activity	14	6522	36	3941	Under-represented	1.49704e-05
GO:0000096	sulfur amino acid metabolic process	0	6536	14	3963	Under-represented	1.55955e-05
GO:0044272	sulfur compound biosynthetic process	0	6536	14	3963	Under-represented	1.55955e-05
GO:0004518	nuclease activity	27	6509	50	3927	Under-represented	1.91296e-05
GO:0005740	mitochondrial envelope	12	6524	33	3944	Under-represented	1.97023e-05
GO:0022402	cell cycle process	11	6525	32	3945	Under-represented	2.0278e-05
GO:0051321	meiotic cell cycle	6	6530	25	3952	Under-represented	2.17383e-05
GO:0012505	endomembrane system	15	6521	37	3940	Under-represented	2.27251e-05
GO:0007049	cell cycle	15	6521	37	3940	Under-represented	2.27251e-05
GO:0004842	ubiquitin-protein ligase activity	9	6527	29	3948	Under-represented	2.30474e-05
GO:0015238	drug transporter activity	1	6535	16	3961	Under-represented	2.33442e-05
GO:0015893	drug transport	1	6535	16	3961	Under-represented	2.33442e-05
GO:0042493	response to drug	1	6535	16	3961	Under-represented	2.33442e-05
GO:0043285	biopolymer catabolic process	18	6518	40	3937	Under-represented	2.33442e-05
GO:0043141	ATP-dependent 5'-3' DNA helicase activity	13	6523	34	3943	Under-represented	2.78095e-05
GO:0008758	UDP-2,3-diacylglucosamine hydrolase activity	13	6523	34	3943	Under-represented	2.78095e-05
GO:0009055	electron carrier activity	17	6519	39	3938	Under-represented	2.78095e-05
GO:0047429	nucleoside-triphosphate diphosphatase activity	13	6523	34	3943	Under-represented	2.78095e-05
GO:0004787	thiamin-pyrophosphatase activity	13	6523	34	3943	Under-represented	2.78095e-05
GO:0008413	8-oxo-7,8-dihydroguanine triphosphatase activity	13	6523	34	3943	Under-represented	2.78095e-05
GO:0019176	dihydroneopterin monophosphate phosphatase activity	13	6523	34	3943	Under-represented	2.78095e-05
GO:0019177	dihydroneopterin triphosphate pyrophosphohydrolase activity	13	6523	34	3943	Under-represented	2.78095e-05
GO:0008828	dATP pyrophosphohydrolase activity	13	6523	34	3943	Under-represented	2.78095e-05
GO:0000810	diacylglycerol pyrophosphate phosphatase activity	13	6523	34	3943	Under-represented	2.78095e-05
GO:0043139	5'-3' DNA helicase activity	13	6523	34	3943	Under-represented	2.78095e-05
GO:0016758	transferase activity, transferring hexosyl groups	24	6512	46	3931	Under-represented	3.19616e-05
GO:0005057	receptor signaling protein activity	16	6520	37	3940	Under-represented	3.19934e-05
GO:0030163	protein catabolic process	16	6520	37	3940	Under-represented	3.19934e-05
GO:0030117	membrane coat	4	6532	21	3956	Under-represented	3.24656e-05
GO:0048475	coated membrane	4	6532	21	3956	Under-represented	3.24656e-05
GO:0005342	organic acid transmembrane transporter activity	4	6532	21	3956	Under-represented	3.24656e-05
GO:0046943	carboxylic acid transmembrane transporter activity	4	6532	21	3956	Under-represented	3.24656e-05
GO:0008610	lipid biosynthetic process	12	6524	32	3945	Under-represented	3.37758e-05
GO:0019318	hexose metabolic process	12	6524	32	3945	Under-represented	3.37758e-05
GO:0008812	choline dehydrogenase activity	0	6536	13	3964	Under-represented	3.66878e-05
GO:0004299	proteasome endopeptidase activity	3	6533	19	3958	Under-represented	4.28177e-05
GO:0004298	threonine endopeptidase activity	3	6533	19	3958	Under-represented	4.28177e-05
GO:0016881	acid-amino acid ligase activity	27	6509	49	3928	Under-represented	4.28177e-05
GO:0005996	monosaccharide metabolic process	14	6522	34	3943	Under-represented	4.44368e-05
GO:0043085	positive regulation of catalytic activity	7	6529	25	3952	Under-represented	4.62929e-05
GO:0016746	transferase activity, transferring acyl groups	67	6469	86	3891	Under-represented	5.05815e-05
GO:0006732	coenzyme metabolic process	21	6515	42	3935	Under-represented	5.70032e-05
GO:0030295	protein kinase activator activity	23	6513	44	3933	Under-represented	6.07736e-05
GO:0016835	carbon-oxygen lyase activity	23	6513	44	3933	Under-represented	6.07736e-05
GO:0004721	phosphoprotein phosphatase activity	11	6525	30	3947	Under-represented	6.07736e-05
GO:0016651	oxidoreductase activity, acting on NADH or NADPH	15	6521	35	3942	Under-represented	6.07736e-05
GO:0019209	kinase activator activity	23	6513	44	3933	Under-represented	6.07736e-05
GO:0016836	hydro-lyase activity	17	6519	37	3940	Under-represented	7.25683e-05
GO:0051246	regulation of protein metabolic process	6	6530	23	3954	Under-represented	7.74319e-05
GO:0016791	phosphoric monoester hydrolase activity	32	6504	52	3925	Under-represented	8.53487e-05
GO:0015980	energy derivation by oxidation of organic compounds	0	6536	12	3965	Under-represented	9.20171e-05
GO:0015299	solute:hydrogen antiporter activity	3	6533	18	3959	Under-represented	9.28982e-05
GO:0015298	solute:cation antiporter activity	3	6533	18	3959	Under-represented	9.28982e-05
GO:0016878	acid-thiol ligase activity	3	6533	18	3959	Under-represented	9.28982e-05
GO:0015300	solute:solute antiporter activity	3	6533	18	3959	Under-represented	9.28982e-05
GO:0004716	receptor signaling protein tyrosine kinase activity	15	6521	34	3943	Under-represented	0.000102386
GO:0042895	antibiotic transporter activity	1	6535	14	3963	Under-represented	0.000123351
GO:0015520	tetracycline:hydrogen antiporter activity	1	6535	14	3963	Under-represented	0.000123351
GO:0008493	tetracycline transporter activity	1	6535	14	3963	Under-represented	0.000123351
GO:0015904	tetracycline transport	1	6535	14	3963	Under-represented	0.000123351
GO:0015307	drug:hydrogen antiporter activity	1	6535	14	3963	Under-represented	0.000123351
GO:0003723	RNA binding	39	6497	58	3919	Under-represented	0.000128342
GO:0005829	cytosol	5	6531	21	3956	Under-represented	0.000141101
GO:0044445	cytosolic part	5	6531	21	3956	Under-represented	0.000141101
GO:0004033	aldo-keto reductase activity	9	6527	26	3951	Under-represented	0.000142269
GO:0019887	protein kinase regulator activity	25	6511	44	3933	Under-represented	0.000156276
GO:0019207	kinase regulator activity	25	6511	44	3933	Under-represented	0.000156276
GO:0006811	ion transport	39	6497	57	3920	Under-represented	0.000193127
GO:0051186	cofactor metabolic process	28	6508	47	3930	Under-represented	0.000199248
GO:0004534	5'-3' exoribonuclease activity	0	6536	11	3966	Under-represented	0.000226418
GO:0000175	3'-5'-exoribonuclease activity	0	6536	11	3966	Under-represented	0.000226418
GO:0008678	2-deoxy-D-gluconate 3-dehydrogenase activity	0	6536	11	3966	Under-represented	0.000226418
GO:0008409	5'-3' exonuclease activity	0	6536	11	3966	Under-represented	0.000226418
GO:0006084	acetyl-CoA metabolic process	0	6536	11	3966	Under-represented	0.000226418
GO:0046903	secretion	5	6531	20	3957	Under-represented	0.000270057
GO:0032940	secretion by cell	5	6531	20	3957	Under-represented	0.000270057
GO:0003924	GTPase activity	12	6524	29	3948	Under-represented	0.000280124
GO:0005509	calcium ion binding	22	6514	40	3937	Under-represented	0.000300711
GO:0006399	tRNA metabolic process	26	6510	44	3933	Under-represented	0.000304606
GO:0004428	inositol or phosphatidylinositol kinase activity	10	6526	26	3951	Under-represented	0.000374835
GO:0005794	Golgi apparatus	3	6533	16	3961	Under-represented	0.000443009
GO:0004707	MAP kinase activity	15	6521	31	3946	Under-represented	0.000515843
GO:0004702	receptor signaling protein serine/threonine kinase activity	15	6521	31	3946	Under-represented	0.000515843
GO:0004448	isocitrate dehydrogenase activity	7	6529	22	3955	Under-represented	0.000519301
GO:0045045	secretory pathway	5	6531	19	3958	Under-represented	0.000526786
GO:0009109	coenzyme catabolic process	0	6536	10	3967	Under-represented	0.000568004
GO:0051187	cofactor catabolic process	0	6536	10	3967	Under-represented	0.000568004
GO:0009060	aerobic respiration	0	6536	10	3967	Under-represented	0.000568004
GO:0000097	sulfur amino acid biosynthetic process	0	6536	10	3967	Under-represented	0.000568004
GO:0006099	tricarboxylic acid cycle	0	6536	10	3967	Under-represented	0.000568004
GO:0045333	cellular respiration	0	6536	10	3967	Under-represented	0.000568004
GO:0046356	acetyl-CoA catabolic process	0	6536	10	3967	Under-represented	0.000568004
GO:0055086	nucleobase, nucleoside and nucleotide metabolic process	34	6502	50	3927	Under-represented	0.000583702
GO:0006334	nucleosome assembly	1	6535	12	3965	Under-represented	0.000682163
GO:0000252	C-3 sterol dehydrogenase (C-4 sterol decarboxylase) activity	7	6529	21	3956	Under-represented	0.000936399
GO:0044431	Golgi apparatus part	3	6533	15	3962	Under-represented	0.000949253
GO:0016405	CoA-ligase activity	3	6533	15	3962	Under-represented	0.000949253
GO:0009064	glutamine family amino acid metabolic process	5	6531	18	3959	Under-represented	0.00102127
GO:0016051	carbohydrate biosynthetic process	4	6532	17	3960	Under-represented	0.00105548
GO:0051540	metal cluster binding	6	6530	19	3958	Under-represented	0.00113696
GO:0051536	iron-sulfur cluster binding	6	6530	19	3958	Under-represented	0.00113696
GO:0010181	FMN binding	6	6530	19	3958	Under-represented	0.00113696
GO:0009123	nucleoside monophosphate metabolic process	2	6534	13	3964	Under-represented	0.00131087
GO:0009124	nucleoside monophosphate biosynthetic process	2	6534	13	3964	Under-represented	0.00131087
GO:0044428	nuclear part	27	6509	42	3935	Under-represented	0.00131636
GO:0032787	monocarboxylic acid metabolic process	9	6527	23	3954	Under-represented	0.0013244
GO:0006725	aromatic compound metabolic process	37	6499	51	3926	Under-represented	0.00133092
GO:0030529	ribonucleoprotein complex	76	6460	84	3893	Under-represented	0.00134955
GO:0006950	response to stress	40	6496	54	3923	Under-represented	0.00138673
GO:0016765	transferase activity, transferring alkyl or aryl (other than methyl) groups	12	6524	26	3951	Under-represented	0.00140146
GO:0016709	oxidoreductase activity, acting on paired donors, with incorporation or reduction of molecular oxygen, NADH or NADPH as one donor, and incorporation of one atom of oxygen	23	6513	38	3939	Under-represented	0.00140146
GO:0030118	clathrin coat	0	6536	9	3968	Under-represented	0.00140146
GO:0031982	vesicle	0	6536	9	3968	Under-represented	0.00140146
GO:0031988	membrane-bounded vesicle	0	6536	9	3968	Under-represented	0.00140146
GO:0005798	Golgi-associated vesicle	0	6536	9	3968	Under-represented	0.00140146
GO:0031410	cytoplasmic vesicle	0	6536	9	3968	Under-represented	0.00140146
GO:0016023	cytoplasmic membrane-bounded vesicle	0	6536	9	3968	Under-represented	0.00140146
GO:0043623	cellular protein complex assembly	1	6535	11	3966	Under-represented	0.00156463
GO:0035004	phosphoinositide 3-kinase activity	8	6528	21	3956	Under-represented	0.00158951
GO:0046527	glucosyltransferase activity	8	6528	21	3956	Under-represented	0.00158951
GO:0051082	unfolded protein binding	8	6528	21	3956	Under-represented	0.00158951
GO:0035251	UDP-glucosyltransferase activity	8	6528	21	3956	Under-represented	0.00158951
GO:0016747	transferase activity, transferring groups other than amino-acyl groups	64	6472	74	3903	Under-represented	0.0016049
GO:0016229	steroid dehydrogenase activity	11	6525	25	3952	Under-represented	0.0016049
GO:0016769	transferase activity, transferring nitrogenous groups	7	6529	20	3957	Under-represented	0.00161056
GO:0033765	steroid dehydrogenase activity, acting on the CH-CH group of donors	7	6529	20	3957	Under-represented	0.00161056
GO:0042578	phosphoric ester hydrolase activity	52	6484	63	3914	Under-represented	0.00189012
GO:0006323	DNA packaging	4	6532	16	3961	Under-represented	0.00189012
GO:0008483	transaminase activity	5	6531	17	3960	Under-represented	0.0018902
GO:0043413	biopolymer glycosylation	3	6533	14	3963	Under-represented	0.00192349
GO:0006096	glycolysis	3	6533	14	3963	Under-represented	0.00192349
GO:0001727	lipid kinase activity	10	6526	23	3954	Under-represented	0.00199754
GO:0008415	acyltransferase activity	64	6472	73	3904	Under-represented	0.00213894
GO:0044257	cellular protein catabolic process	16	6520	29	3948	Under-represented	0.0026861
GO:0043632	modification-dependent macromolecule catabolic process	16	6520	29	3948	Under-represented	0.0026861
GO:0046483	heterocycle metabolic process	16	6520	29	3948	Under-represented	0.0026861
GO:0004690	cyclic nucleotide-dependent protein kinase activity	16	6520	29	3948	Under-represented	0.0026861
GO:0006511	ubiquitin-dependent protein catabolic process	16	6520	29	3948	Under-represented	0.0026861
GO:0051603	proteolysis involved in cellular protein catabolic process	16	6520	29	3948	Under-represented	0.0026861
GO:0033764	steroid dehydrogenase activity, acting on the CH-OH group of donors, NAD or NADP as acceptor	11	6525	24	3953	Under-represented	0.0026861
GO:0019941	modification-dependent protein catabolic process	16	6520	29	3948	Under-represented	0.0026861
GO:0022613	ribonucleoprotein complex biogenesis and assembly	16	6520	29	3948	Under-represented	0.0026861
GO:0005839	proteasome core complex	2	6534	12	3965	Under-represented	0.00268789
GO:0000502	proteasome complex	2	6534	12	3965	Under-represented	0.00268789
GO:0008408	3'-5' exonuclease activity	2	6534	12	3965	Under-represented	0.00268789
GO:0009161	ribonucleoside monophosphate metabolic process	2	6534	12	3965	Under-represented	0.00268789
GO:0009156	ribonucleoside monophosphate biosynthetic process	2	6534	12	3965	Under-represented	0.00268789
GO:0004680	casein kinase activity	20	6516	33	3944	Under-represented	0.00268789
GO:0009081	branched chain family amino acid metabolic process	2	6534	12	3965	Under-represented	0.00268789
GO:0043713	(R)-2-hydroxyisocaproate dehydrogenase activity	7	6529	19	3958	Under-represented	0.00278947
GO:0051990	(R)-2-hydroxyglutarate dehydrogenase activity	7	6529	19	3958	Under-represented	0.00278947
GO:0048258	3-ketoglucose-reductase activity	7	6529	19	3958	Under-represented	0.00278947
GO:0032442	phenylcoumaran benzylic ether reductase activity	7	6529	19	3958	Under-represented	0.00278947
GO:0018451	epoxide dehydrogenase activity	7	6529	19	3958	Under-represented	0.00278947
GO:0018452	5-exo-hydroxycamphor dehydrogenase activity	7	6529	19	3958	Under-represented	0.00278947
GO:0018453	2-hydroxytetrahydrofuran dehydrogenase activity	7	6529	19	3958	Under-represented	0.00278947
GO:0004495	mevaldate reductase activity	7	6529	19	3958	Under-represented	0.00278947
GO:0000253	3-keto sterol reductase activity	7	6529	19	3958	Under-represented	0.00278947
GO:0004677	DNA-dependent protein kinase activity	15	6521	28	3949	Under-represented	0.00288782
GO:0004679	AMP-activated protein kinase activity	15	6521	28	3949	Under-represented	0.00288782
GO:0008349	MAP kinase kinase kinase kinase activity	15	6521	28	3949	Under-represented	0.00288782
GO:0008194	UDP-glycosyltransferase activity	15	6521	28	3949	Under-represented	0.00288782
GO:0004696	glycogen synthase kinase 3 activity	15	6521	28	3949	Under-represented	0.00288782
GO:0004695	galactosyltransferase-associated kinase activity	15	6521	28	3949	Under-represented	0.00288782
GO:0008545	JUN kinase kinase activity	15	6521	28	3949	Under-represented	0.00288782
GO:0004681	casein kinase I activity	15	6521	28	3949	Under-represented	0.00288782
GO:0008338	MAP kinase 1 activity	15	6521	28	3949	Under-represented	0.00288782
GO:0008339	MP kinase activity	15	6521	28	3949	Under-represented	0.00288782
GO:0034211	GTP-dependent protein kinase activity	15	6521	28	3949	Under-represented	0.00288782
GO:0004694	eukaryotic translation initiation factor 2alpha kinase activity	15	6521	28	3949	Under-represented	0.00288782
GO:0019912	cyclin-dependent protein kinase activating kinase activity	15	6521	28	3949	Under-represented	0.00288782
GO:0016908	MAP kinase 2 activity	15	6521	28	3949	Under-represented	0.00288782
GO:0016909	SAP kinase activity	15	6521	28	3949	Under-represented	0.00288782
GO:0004675	transmembrane receptor protein serine/threonine kinase activity	15	6521	28	3949	Under-represented	0.00288782
GO:0004676	3-phosphoinositide-dependent protein kinase activity	15	6521	28	3949	Under-represented	0.00288782
GO:0004712	protein serine/threonine/tyrosine kinase activity	15	6521	28	3949	Under-represented	0.00288782
GO:0004710	MAP/ERK kinase kinase activity	15	6521	28	3949	Under-represented	0.00288782
GO:0004711	ribosomal protein S6 kinase activity	15	6521	28	3949	Under-represented	0.00288782
GO:0004718	Janus kinase activity	15	6521	28	3949	Under-represented	0.00288782
GO:0004705	JUN kinase activity	15	6521	28	3949	Under-represented	0.00288782
GO:0004704	NF-kappaB-inducing kinase activity	15	6521	28	3949	Under-represented	0.00288782
GO:0004706	JUN kinase kinase kinase activity	15	6521	28	3949	Under-represented	0.00288782
GO:0004700	atypical protein kinase C activity	15	6521	28	3949	Under-represented	0.00288782
GO:0004709	MAP kinase kinase kinase activity	15	6521	28	3949	Under-represented	0.00288782
GO:0004708	MAP kinase kinase activity	15	6521	28	3949	Under-represented	0.00288782
GO:0019199	transmembrane receptor protein kinase activity	15	6521	28	3949	Under-represented	0.00288782
GO:0004888	transmembrane receptor activity	21	6515	34	3943	Under-represented	0.00290838
GO:0006298	mismatch repair	0	6536	8	3969	Under-represented	0.00298043
GO:0046394	carboxylic acid biosynthetic process	0	6536	8	3969	Under-represented	0.00298043
GO:0006633	fatty acid biosynthetic process	0	6536	8	3969	Under-represented	0.00298043
GO:0030662	coated vesicle membrane	0	6536	8	3969	Under-represented	0.00298043
GO:0012506	vesicle membrane	0	6536	8	3969	Under-represented	0.00298043
GO:0003690	double-stranded DNA binding	0	6536	8	3969	Under-represented	0.00298043
GO:0030659	cytoplasmic vesicle membrane	0	6536	8	3969	Under-represented	0.00298043
GO:0030120	vesicle coat	0	6536	8	3969	Under-represented	0.00298043
GO:0030135	coated vesicle	0	6536	8	3969	Under-represented	0.00298043
GO:0045005	maintenance of fidelity during DNA-dependent DNA replication	0	6536	8	3969	Under-represented	0.00298043
GO:0019888	protein phosphatase regulator activity	6	6530	18	3959	Under-represented	0.00298043
GO:0008240	tripeptidyl-peptidase activity	0	6536	8	3969	Under-represented	0.00298043
GO:0044433	cytoplasmic vesicle part	0	6536	8	3969	Under-represented	0.00298043
GO:0016053	organic acid biosynthetic process	0	6536	8	3969	Under-represented	0.00298043
GO:0008471	laccase activity	0	6536	8	3969	Under-represented	0.00298043
GO:0015932	nucleobase, nucleoside, nucleotide and nucleic acid transmembrane transporter activity	0	6536	8	3969	Under-represented	0.00298043
GO:0006887	exocytosis	0	6536	8	3969	Under-represented	0.00298043
GO:0030983	mismatched DNA binding	0	6536	8	3969	Under-represented	0.00298043
GO:0006555	methionine metabolic process	0	6536	8	3969	Under-represented	0.00298043
GO:0019208	phosphatase regulator activity	6	6530	18	3959	Under-represented	0.00298043
GO:0031497	chromatin assembly	4	6532	15	3962	Under-represented	0.0030328
GO:0016628	oxidoreductase activity, acting on the CH-CH group of donors, NAD or NADP as acceptor	4	6532	15	3962	Under-represented	0.0030328
GO:0003960	NADPH:quinone reductase activity	4	6532	15	3962	Under-represented	0.0030328
GO:0016866	intramolecular transferase activity	4	6532	15	3962	Under-represented	0.0030328
GO:0051170	nuclear import	1	6535	10	3967	Under-represented	0.0030328
GO:0006606	protein import into nucleus	1	6535	10	3967	Under-represented	0.0030328
GO:0007010	cytoskeleton organization and biogenesis	9	6527	21	3956	Under-represented	0.00324417
GO:0051287	NAD binding	9	6527	21	3956	Under-represented	0.00324417
GO:0050661	NADP binding	3	6533	13	3964	Under-represented	0.00346181
GO:0003887	DNA-directed DNA polymerase activity	11	6525	23	3954	Under-represented	0.00379835
GO:0006006	glucose metabolic process	11	6525	23	3954	Under-represented	0.00379835
GO:0016811	hydrolase activity, acting on carbon-nitrogen (but not peptide) bonds, in linear amides	11	6525	23	3954	Under-represented	0.00379835
GO:0044275	cellular carbohydrate catabolic process	11	6525	23	3954	Under-represented	0.00379835
GO:0034061	DNA polymerase activity	11	6525	23	3954	Under-represented	0.00379835
GO:0042027	cyclophilin-type peptidyl-prolyl cis-trans isomerase activity	8	6528	20	3957	Under-represented	0.0039271
GO:0016859	cis-trans isomerase activity	8	6528	20	3957	Under-represented	0.0039271
GO:0003755	peptidyl-prolyl cis-trans isomerase activity	8	6528	20	3957	Under-represented	0.0039271
GO:0009072	aromatic amino acid family metabolic process	8	6528	20	3957	Under-represented	0.0039271
GO:0030051	FK506-sensitive peptidyl-prolyl cis-trans isomerase	8	6528	20	3957	Under-represented	0.0039271
GO:0004600	cyclophilin	8	6528	20	3957	Under-represented	0.0039271
GO:0004872	receptor activity	23	6513	35	3942	Under-represented	0.00396876
GO:0005856	cytoskeleton	13	6523	25	3952	Under-represented	0.00411951
GO:0050789	regulation of biological process	210	6326	180	3797	Under-represented	0.0044106
GO:0005083	small GTPase regulator activity	10	6526	22	3955	Under-represented	0.00474363
GO:0018588	tri-n-butyltin dioxygenase activity	2	6534	11	3966	Under-represented	0.00490693
GO:0018589	di-n-butyltin dioxygenase activity	2	6534	11	3966	Under-represented	0.00490693
GO:0018586	mono-butyltin dioxygenase activity	2	6534	11	3966	Under-represented	0.00490693
GO:0018587	limonene 8-monooxygenase activity	2	6534	11	3966	Under-represented	0.00490693
GO:0018585	fluorene oxygenase activity	2	6534	11	3966	Under-represented	0.00490693
GO:0018600	alpha-pinene dehydrogenase activity	2	6534	11	3966	Under-represented	0.00490693
GO:0018599	2-hydroxyisobutyrate 3-monooxygenase activity	2	6534	11	3966	Under-represented	0.00490693
GO:0018598	hydroxymethylsilanetriol oxidase activity	2	6534	11	3966	Under-represented	0.00490693
GO:0018591	methyl tertiary butyl ether 3-monooxygenase activity	2	6534	11	3966	Under-represented	0.00490693
GO:0018590	methylsilanetriol hydroxylase activity	2	6534	11	3966	Under-represented	0.00490693
GO:0018593	4-chlorophenoxyacetate monooxygenase activity	2	6534	11	3966	Under-represented	0.00490693
GO:0018592	4-nitrocatechol 4-monooxygenase activity	2	6534	11	3966	Under-represented	0.00490693
GO:0018595	alpha-pinene monooxygenase activity	2	6534	11	3966	Under-represented	0.00490693
GO:0018594	tert-butyl alcohol 2-monooxygenase activity	2	6534	11	3966	Under-represented	0.00490693
GO:0018597	ammonia monooxygenase activity	2	6534	11	3966	Under-represented	0.00490693
GO:0018596	dimethylsilanediol hydroxylase activity	2	6534	11	3966	Under-represented	0.00490693
GO:0000786	nucleosome	2	6534	11	3966	Under-represented	0.00490693
GO:0016207	4-coumarate-CoA ligase activity	2	6534	11	3966	Under-represented	0.00490693
GO:0043823	spheroidene monooxygenase activity	2	6534	11	3966	Under-represented	0.00490693
GO:0006325	establishment and/or maintenance of chromatin architecture	12	6524	24	3953	Under-represented	0.00508049
GO:0065008	regulation of biological quality	9	6527	20	3957	Under-represented	0.00536747
GO:0016655	oxidoreductase activity, acting on NADH or NADPH, quinone or similar compound as acceptor	9	6527	20	3957	Under-represented	0.00536747
GO:0005198	structural molecule activity	68	6468	73	3904	Under-represented	0.005371
GO:0004698	calcium-dependent protein kinase C activity	16	6520	28	3949	Under-represented	0.005371
GO:0004697	protein kinase C activity	16	6520	28	3949	Under-represented	0.005371
GO:0004673	protein histidine kinase activity	4	6532	14	3963	Under-represented	0.0054183
GO:0006752	group transfer coenzyme metabolic process	4	6532	14	3963	Under-represented	0.0054183
GO:0016775	phosphotransferase activity, nitrogenous group as acceptor	4	6532	14	3963	Under-represented	0.0054183
GO:0000155	two-component sensor activity	4	6532	14	3963	Under-represented	0.0054183
GO:0005543	phospholipid binding	4	6532	14	3963	Under-represented	0.0054183
GO:0018193	peptidyl-amino acid modification	5	6531	15	3962	Under-represented	0.00562125
GO:0008875	gluconate dehydrogenase activity	8	6528	19	3958	Under-represented	0.00632086
GO:0009112	nucleobase metabolic process	1	6535	9	3968	Under-represented	0.00656416
GO:0043566	structure-specific DNA binding	1	6535	9	3968	Under-represented	0.00656416
GO:0016830	carbon-carbon lyase activity	15	6521	26	3951	Under-represented	0.00656416
GO:0000059	protein import into nucleus, docking	1	6535	9	3968	Under-represented	0.00656416
GO:0004540	ribonuclease activity	17	6519	28	3949	Under-represented	0.00656416
GO:0022406	membrane docking	0	6536	7	3970	Under-represented	0.00673947
GO:0004249	stromelysin 3 activity	0	6536	7	3970	Under-represented	0.00673947
GO:0030119	AP-type membrane coat adaptor complex	0	6536	7	3970	Under-represented	0.00673947
GO:0030131	clathrin adaptor complex	0	6536	7	3970	Under-represented	0.00673947
GO:0016823	hydrolase activity, acting on acid carbon-carbon bonds, in ketonic substances	0	6536	7	3970	Under-represented	0.00673947
GO:0006270	DNA replication initiation	0	6536	7	3970	Under-represented	0.00673947
GO:0018667	cyclohexanone monooxygenase activity	0	6536	7	3970	Under-represented	0.00673947
GO:0019131	tripeptidyl-peptidase I activity	0	6536	7	3970	Under-represented	0.00673947
GO:0008133	collagenase activity	0	6536	7	3970	Under-represented	0.00673947
GO:0016868	intramolecular transferase activity, phosphotransferases	0	6536	7	3970	Under-represented	0.00673947
GO:0004029	aldehyde dehydrogenase (NAD) activity	0	6536	7	3970	Under-represented	0.00673947
GO:0030402	matrilysin-2 activity	0	6536	7	3970	Under-represented	0.00673947
GO:0016822	hydrolase activity, acting on acid carbon-carbon bonds	0	6536	7	3970	Under-represented	0.00673947
GO:0032268	regulation of cellular protein metabolic process	0	6536	7	3970	Under-represented	0.00673947
GO:0048278	vesicle docking	0	6536	7	3970	Under-represented	0.00673947
GO:0015205	nucleobase transmembrane transporter activity	0	6536	7	3970	Under-represented	0.00673947
GO:0008319	prenyl protein specific endopeptidase activity	0	6536	7	3970	Under-represented	0.00673947
GO:0006007	glucose catabolic process	10	6526	21	3956	Under-represented	0.00709665
GO:0019320	hexose catabolic process	10	6526	21	3956	Under-represented	0.00709665
GO:0046365	monosaccharide catabolic process	10	6526	21	3956	Under-represented	0.00709665
GO:0006812	cation transport	33	6503	43	3934	Under-represented	0.00721047
GO:0005694	chromosome	18	6518	29	3948	Under-represented	0.00765713
GO:0008287	protein serine/threonine phosphatase complex	6	6530	16	3961	Under-represented	0.00813234
GO:0046677	response to antibiotic	6	6530	16	3961	Under-represented	0.00813234
GO:0016661	oxidoreductase activity, acting on other nitrogenous compounds as donors	9	6527	19	3958	Under-represented	0.0088663
GO:0006753	nucleoside phosphate metabolic process	29	6507	39	3938	Under-represented	0.00899569
GO:0009117	nucleotide metabolic process	29	6507	39	3938	Under-represented	0.00899569
GO:0043038	amino acid activation	19	6517	29	3948	Under-represented	0.0094737
GO:0043039	tRNA aminoacylation	19	6517	29	3948	Under-represented	0.0094737
GO:0006418	tRNA aminoacylation for protein translation	19	6517	29	3948	Under-represented	0.0094737
GO:0008135	translation factor activity, nucleic acid binding	11	6525	21	3956	Under-represented	0.00964859
GO:0046164	alcohol catabolic process	11	6525	21	3956	Under-represented	0.00964859
GO:0045182	translation regulator activity	11	6525	21	3956	Under-represented	0.00964859
GO:0009101	glycoprotein biosynthetic process	2	6534	10	3967	Under-represented	0.00985239
GO:0004180	carboxypeptidase activity	4	6532	13	3964	Under-represented	0.00985239
GO:0009110	vitamin biosynthetic process	4	6532	13	3964	Under-represented	0.00985239
GO:0042364	water-soluble vitamin biosynthetic process	4	6532	13	3964	Under-represented	0.00985239
GO:0009167	purine ribonucleoside monophosphate metabolic process	2	6534	10	3967	Under-represented	0.00985239
GO:0009168	purine ribonucleoside monophosphate biosynthetic process	2	6534	10	3967	Under-represented	0.00985239
GO:0006486	protein amino acid glycosylation	2	6534	10	3967	Under-represented	0.00985239
GO:0004338	glucan 1,3-beta-glucosidase activity	2	6534	10	3967	Under-represented	0.00985239
GO:0016052	carbohydrate catabolic process	13	6523	23	3954	Under-represented	0.00985239
GO:0015923	mannosidase activity	4	6532	13	3964	Under-represented	0.00985239
GO:0009126	purine nucleoside monophosphate metabolic process	2	6534	10	3967	Under-represented	0.00985239
GO:0009127	purine nucleoside monophosphate biosynthetic process	2	6534	10	3967	Under-represented	0.00985239
GO:0022890	inorganic cation transmembrane transporter activity	30	6506	39	3938	Under-represented	0.00994029
GO:0008443	phosphofructokinase activity	8	6528	18	3959	Under-represented	0.00995997
GO:0000030	mannosyltransferase activity	8	6528	18	3959	Under-represented	0.00995997
GO:0008169	C-methyltransferase activity	5	6531	14	3963	Under-represented	0.0100164
GO:0007017	microtubule-based process	5	6531	14	3963	Under-represented	0.0100164
GO:0004725	protein tyrosine phosphatase activity	5	6531	14	3963	Under-represented	0.0100164
GO:0009165	nucleotide biosynthetic process	20	6516	30	3947	Under-represented	0.0105709
GO:0006631	fatty acid metabolic process	3	6533	12	3965	Under-represented	0.0106385
GO:0009063	amino acid catabolic process	3	6533	12	3965	Under-represented	0.0106385
GO:0016679	oxidoreductase activity, acting on diphenols and related substances as donors	3	6533	12	3965	Under-represented	0.0106385
GO:0009066	aspartate family amino acid metabolic process	3	6533	12	3965	Under-represented	0.0106385
GO:0006333	chromatin assembly or disassembly	10	6526	20	3957	Under-represented	0.0111429
GO:0051276	chromosome organization and biogenesis	16	6520	26	3951	Under-represented	0.0116377
GO:0030695	GTPase regulator activity	14	6522	24	3953	Under-represented	0.0118733
GO:0008033	tRNA processing	7	6529	16	3961	Under-represented	0.0128128
GO:0022618	protein-RNA complex assembly	7	6529	16	3961	Under-represented	0.0128128
GO:0017018	myosin phosphatase activity	6	6530	15	3962	Under-represented	0.0136903
GO:0017020	myosin phosphatase regulator activity	6	6530	15	3962	Under-represented	0.0136903
GO:0017023	myosin phosphatase complex	6	6530	15	3962	Under-represented	0.0136903
GO:0008420	CTD phosphatase activity	6	6530	15	3962	Under-represented	0.0136903
GO:0004300	enoyl-CoA hydratase activity	1	6535	8	3969	Under-represented	0.0136903
GO:0008597	calcium-dependent protein serine/threonine phosphatase regulator activity	6	6530	15	3962	Under-represented	0.0136903
GO:0016682	oxidoreductase activity, acting on diphenols and related substances as donors, oxygen as acceptor	1	6535	8	3969	Under-represented	0.0136903
GO:0004571	mannosyl-oligosaccharide 1,2-alpha-mannosidase activity	1	6535	8	3969	Under-represented	0.0136903
GO:0003925	small monomeric GTPase activity	1	6535	8	3969	Under-represented	0.0136903
GO:0015924	mannosyl-oligosaccharide mannosidase activity	1	6535	8	3969	Under-represented	0.0136903
GO:0004723	calcium-dependent protein serine/threonine phosphatase activity	6	6530	15	3962	Under-represented	0.0136903
GO:0005963	magnesium-dependent protein serine/threonine phosphatase complex	6	6530	15	3962	Under-represented	0.0136903
GO:0009451	RNA modification	1	6535	8	3969	Under-represented	0.0136903
GO:0004724	magnesium-dependent protein serine/threonine phosphatase activity	6	6530	15	3962	Under-represented	0.0136903
GO:0004722	protein serine/threonine phosphatase activity	6	6530	15	3962	Under-represented	0.0136903
GO:0016646	oxidoreductase activity, acting on the CH-NH group of donors, NAD or NADP as acceptor	1	6535	8	3969	Under-represented	0.0136903
GO:0016307	phosphatidylinositol phosphate kinase activity	9	6527	18	3959	Under-represented	0.0143115
GO:0044430	cytoskeletal part	11	6525	20	3957	Under-represented	0.0152326
GO:0030001	metal ion transport	13	6523	22	3955	Under-represented	0.0154111
GO:0009966	regulation of signal transduction	13	6523	22	3955	Under-represented	0.0154111
GO:0051128	regulation of cellular component organization and biogenesis	0	6536	6	3971	Under-represented	0.0154912
GO:0031957	very-long-chain-fatty-acid-CoA ligase activity	0	6536	6	3971	Under-represented	0.0154912
GO:0004467	long-chain-fatty-acid-CoA ligase activity	0	6536	6	3971	Under-represented	0.0154912
GO:0006904	vesicle docking during exocytosis	0	6536	6	3971	Under-represented	0.0154912
GO:0046040	IMP metabolic process	0	6536	6	3971	Under-represented	0.0154912
GO:0015645	fatty-acid ligase activity	0	6536	6	3971	Under-represented	0.0154912
GO:0004334	fumarylacetoacetase activity	0	6536	6	3971	Under-represented	0.0154912
GO:0031955	short-chain-fatty-acid-CoA ligase activity	0	6536	6	3971	Under-represented	0.0154912
GO:0031956	medium-chain-fatty-acid-CoA ligase activity	0	6536	6	3971	Under-represented	0.0154912
GO:0004100	chitin synthase activity	0	6536	6	3971	Under-represented	0.0154912
GO:0009086	methionine biosynthetic process	0	6536	6	3971	Under-represented	0.0154912
GO:0001522	pseudouridine synthesis	0	6536	6	3971	Under-represented	0.0154912
GO:0006188	IMP biosynthetic process	0	6536	6	3971	Under-represented	0.0154912
GO:0009982	pseudouridine synthase activity	0	6536	6	3971	Under-represented	0.0154912
GO:0006534	cysteine metabolic process	0	6536	6	3971	Under-represented	0.0154912
GO:0004040	amidase activity	0	6536	6	3971	Under-represented	0.0154912
GO:0003939	L-iditol 2-dehydrogenase activity	0	6536	6	3971	Under-represented	0.0154912
GO:0065004	protein-DNA complex assembly	8	6528	17	3960	Under-represented	0.0158462
GO:0051336	regulation of hydrolase activity	8	6528	17	3960	Under-represented	0.0158462
GO:0006605	protein targeting	8	6528	17	3960	Under-represented	0.0158462
GO:0008238	exopeptidase activity	16	6520	25	3952	Under-represented	0.0169783
GO:0009108	coenzyme biosynthetic process	10	6526	19	3958	Under-represented	0.0172047
GO:0005840	ribosome	59	6477	62	3915	Under-represented	0.0172047
GO:0003995	acyl-CoA dehydrogenase activity	4	6532	12	3965	Under-represented	0.0172047
GO:0009310	amine catabolic process	4	6532	12	3965	Under-represented	0.0172047
GO:0003735	structural constituent of ribosome	59	6477	62	3915	Under-represented	0.0172047
GO:0018202	peptidyl-histidine modification	4	6532	12	3965	Under-represented	0.0172047
GO:0009069	serine family amino acid metabolic process	4	6532	12	3965	Under-represented	0.0172047
GO:0044270	nitrogen compound catabolic process	4	6532	12	3965	Under-represented	0.0172047
GO:0044427	chromosomal part	12	6524	21	3956	Under-represented	0.017604
GO:0009100	glycoprotein metabolic process	3	6533	11	3966	Under-represented	0.018547
GO:0035091	phosphoinositide binding	3	6533	11	3966	Under-represented	0.018547
GO:0042221	response to chemical stimulus	19	6517	28	3949	Under-represented	0.0188995
GO:0006289	nucleotide-excision repair	2	6534	9	3968	Under-represented	0.0193581
GO:0031980	mitochondrial lumen	2	6534	9	3968	Under-represented	0.0193581
GO:0000139	Golgi membrane	2	6534	9	3968	Under-represented	0.0193581
GO:0000051	urea cycle intermediate metabolic process	2	6534	9	3968	Under-represented	0.0193581
GO:0009084	glutamine family amino acid biosynthetic process	2	6534	9	3968	Under-represented	0.0193581
GO:0005759	mitochondrial matrix	2	6534	9	3968	Under-represented	0.0193581
GO:0006525	arginine metabolic process	2	6534	9	3968	Under-represented	0.0193581
GO:0016810	hydrolase activity, acting on carbon-nitrogen (but not peptide) bonds	45	6491	50	3927	Under-represented	0.0198011
GO:0000160	two-component signal transduction system (phosphorelay)	6	6530	14	3963	Under-represented	0.0229393
GO:0004576	oligosaccharyl transferase activity	6	6530	14	3963	Under-represented	0.0229393
GO:0050794	regulation of cellular process	188	6348	155	3822	Under-represented	0.0235291
GO:0016876	ligase activity, forming aminoacyl-tRNA and related compounds	21	6515	29	3948	Under-represented	0.0249584
GO:0016875	ligase activity, forming carbon-oxygen bonds	21	6515	29	3948	Under-represented	0.0249584
GO:0004812	aminoacyl-tRNA ligase activity	21	6515	29	3948	Under-represented	0.0249584
GO:0042556	eukaryotic elongation factor-2 kinase regulator activity	8	6528	16	3961	Under-represented	0.0256709
GO:0042557	eukaryotic elongation factor-2 kinase activator activity	8	6528	16	3961	Under-represented	0.0256709
GO:0008607	phosphorylase kinase regulator activity	8	6528	16	3961	Under-represented	0.0256709
GO:0043841	(S)-lactate 2-kinase activity	8	6528	16	3961	Under-represented	0.0256709
GO:0043771	cytidine kinase activity	8	6528	16	3961	Under-represented	0.0256709
GO:0042592	homeostatic process	8	6528	16	3961	Under-represented	0.0256709
GO:0018720	phenol kinase activity	8	6528	16	3961	Under-represented	0.0256709
GO:0043743	LPPG:FO 2-phospho-L-lactate transferase activity	8	6528	16	3961	Under-represented	0.0256709
GO:0051731	polynucleotide kinase activity	8	6528	16	3961	Under-represented	0.0256709
GO:0051734	ATP-dependent polynucleotide kinase activity	8	6528	16	3961	Under-represented	0.0256709
GO:0051735	GTP-dependent polynucleotide kinase activity	8	6528	16	3961	Under-represented	0.0256709
GO:0019914	cyclin-dependent protein kinase activating kinase regulator activity	8	6528	16	3961	Under-represented	0.0256709
GO:0043798	glycerate 2-kinase activity	8	6528	16	3961	Under-represented	0.0256709
GO:0032942	inositol tetrakisphosphate 2-kinase activity	8	6528	16	3961	Under-represented	0.0256709
GO:0051765	inositol tetrakisphosphate kinase activity	8	6528	16	3961	Under-represented	0.0256709
GO:0008819	cobinamide kinase activity	8	6528	16	3961	Under-represented	0.0256709
GO:0016662	oxidoreductase activity, acting on other nitrogenous compounds as donors, cytochrome as acceptor	8	6528	16	3961	Under-represented	0.0256709
GO:0051188	cofactor biosynthetic process	14	6522	22	3955	Under-represented	0.0262579
GO:0005783	endoplasmic reticulum	12	6524	20	3957	Under-represented	0.0267772
GO:0008235	metalloexopeptidase activity	5	6531	13	3964	Under-represented	0.0267772
GO:0031965	nuclear membrane	5	6531	13	3964	Under-represented	0.0267772
GO:0046930	pore complex	5	6531	13	3964	Under-represented	0.0267772
GO:0005643	nuclear pore	5	6531	13	3964	Under-represented	0.0267772
GO:0006512	ubiquitin cycle	5	6531	13	3964	Under-represented	0.0267772
GO:0005635	nuclear envelope	5	6531	13	3964	Under-represented	0.0267772
GO:0044453	nuclear membrane part	5	6531	13	3964	Under-represented	0.0267772
GO:0016071	mRNA metabolic process	12	6524	20	3957	Under-represented	0.0267772
GO:0035173	histone kinase activity	1	6535	7	3970	Under-represented	0.0283215
GO:0006563	L-serine metabolic process	1	6535	7	3970	Under-represented	0.0283215
GO:0018110	histone arginine kinase activity	1	6535	7	3970	Under-represented	0.0283215
GO:0046112	nucleobase biosynthetic process	1	6535	7	3970	Under-represented	0.0283215
GO:0000041	transition metal ion transport	1	6535	7	3970	Under-represented	0.0283215
GO:0015103	inorganic anion transmembrane transporter activity	1	6535	7	3970	Under-represented	0.0283215
GO:0008202	steroid metabolic process	1	6535	7	3970	Under-represented	0.0283215
GO:0051258	protein polymerization	1	6535	7	3970	Under-represented	0.0283215
GO:0004054	arginine kinase activity	1	6535	7	3970	Under-represented	0.0283215
GO:0018106	peptidyl-histidine phosphorylation	4	6532	11	3966	Under-represented	0.0309212
GO:0043284	biopolymer biosynthetic process	4	6532	11	3966	Under-represented	0.0309212
GO:0004024	alcohol dehydrogenase activity, zinc-dependent	7	6529	15	3962	Under-represented	0.0314003
GO:0004025	alcohol dehydrogenase activity, iron-dependent	7	6529	15	3962	Under-represented	0.0314003
GO:0004022	alcohol dehydrogenase activity	7	6529	15	3962	Under-represented	0.0314003
GO:0004023	alcohol dehydrogenase activity, metal ion-independent	7	6529	15	3962	Under-represented	0.0314003
GO:0051056	regulation of small GTPase mediated signal transduction	13	6523	21	3956	Under-represented	0.0325522
GO:0016886	ligase activity, forming phosphoric ester bonds	3	6533	10	3967	Under-represented	0.0327499
GO:0000287	magnesium ion binding	9	6527	17	3960	Under-represented	0.0334599
GO:0030660	Golgi-associated vesicle membrane	0	6536	5	3972	Under-represented	0.0358159
GO:0016624	oxidoreductase activity, acting on the aldehyde or oxo group of donors, disulfide as acceptor	0	6536	5	3972	Under-represented	0.0358159
GO:0030658	transport vesicle membrane	0	6536	5	3972	Under-represented	0.0358159
GO:0030133	transport vesicle	0	6536	5	3972	Under-represented	0.0358159
GO:0015939	pantothenate metabolic process	0	6536	5	3972	Under-represented	0.0358159
GO:0016885	ligase activity, forming carbon-carbon bonds	0	6536	5	3972	Under-represented	0.0358159
GO:0016303	1-phosphatidylinositol-3-kinase activity	0	6536	5	3972	Under-represented	0.0358159
GO:0006189	'de novo' IMP biosynthetic process	0	6536	5	3972	Under-represented	0.0358159
GO:0016782	transferase activity, transferring sulfur-containing groups	0	6536	5	3972	Under-represented	0.0358159
GO:0015073	phosphatidylinositol 3-kinase, class I, regulator activity	0	6536	5	3972	Under-represented	0.0358159
GO:0015072	phosphatidylinositol 3-kinase, class I, catalyst activity	0	6536	5	3972	Under-represented	0.0358159
GO:0015674	di-, tri-valent inorganic cation transport	0	6536	5	3972	Under-represented	0.0358159
GO:0003988	acetyl-CoA C-acyltransferase activity	0	6536	5	3972	Under-represented	0.0358159
GO:0016439	tRNA-pseudouridine synthase activity	0	6536	5	3972	Under-represented	0.0358159
GO:0006091	generation of precursor metabolites and energy	16	6520	23	3954	Under-represented	0.0363081
GO:0043087	regulation of GTPase activity	6	6530	13	3964	Under-represented	0.0376212
GO:0016701	oxidoreductase activity, acting on single donors with incorporation of molecular oxygen	6	6530	13	3964	Under-represented	0.0376212
GO:0016311	dephosphorylation	6	6530	13	3964	Under-represented	0.0376212
GO:0004376	glycolipid mannosyltransferase activity	6	6530	13	3964	Under-represented	0.0376212
GO:0003684	damaged DNA binding	2	6534	8	3969	Under-represented	0.0380158
GO:0048193	Golgi vesicle transport	2	6534	8	3969	Under-represented	0.0380158
GO:0046912	transferase activity, transferring acyl groups, acyl groups converted into alkyl on transfer	2	6534	8	3969	Under-represented	0.0380158
GO:0015931	nucleobase, nucleoside, nucleotide and nucleic acid transport	2	6534	8	3969	Under-represented	0.0380158
GO:0008289	lipid binding	8	6528	15	3962	Under-represented	0.0409855
GO:0000785	chromatin	8	6528	15	3962	Under-represented	0.0409855
GO:0007265	Ras protein signal transduction	10	6526	17	3960	Under-represented	0.0416602
GO:0046578	regulation of Ras protein signal transduction	10	6526	17	3960	Under-represented	0.0416602
GO:0032318	regulation of Ras GTPase activity	5	6531	12	3965	Under-represented	0.0443235
GO:0019725	cellular homeostasis	5	6531	12	3965	Under-represented	0.0443235
GO:0005576	extracellular region	21	6515	3	3974	Over-represented	0.0464112
GO:0019222	regulation of metabolic process	188	6348	151	3826	Under-represented	0.046954
GO:0004339	glucan 1,4-alpha-glucosidase activity	35	6501	8	3969	Over-represented	0.0486461
KOG___METABOLISM		641	5895	1157	2820	Under-represented	3.03146e-135
KOG___POORLY CHARACTERIZED		616	5920	793	3184	Under-represented	2.56917e-48
KOG___General function prediction only		436	6100	618	3359	Under-represented	5.06816e-44
KOG___CELLULAR PROCESSES AND SIGNALING		615	5921	754	3223	Under-represented	6.79711e-41
KOG___Amino acid transport and metabolism		58	6478	180	3797	Under-represented	4.4088e-30
KOG___Secondary metabolites biosynthesis, transport and catabolism		56	6480	154	3823	Under-represented	3.05868e-23
KOG0254___Predicted transporter (major facilitator superfamily)		6	6530	76	3901	Under-represented	5.26358e-23
KOG___Posttranslational modification, protein turnover, chaperones		157	6379	263	3714	Under-represented	6.22875e-23
KOG___Intracellular trafficking, secretion, and vesicular transport		86	6450	187	3790	Under-represented	1.57528e-22
KOG___Energy production and conversion		86	6450	175	3802	Under-represented	1.44951e-19
KOG___INFORMATION STORAGE AND PROCESSING		590	5946	606	3371	Under-represented	2.72783e-19
KOG0255___Synaptic vesicle transporter SVOP and related transporters (major facilitator superfamily)		5	6531	57	3920	Under-represented	1.15611e-16
KOG___Lipid transport and metabolism		93	6443	169	3808	Under-represented	3.28227e-16
KOG___Translation, ribosomal structure and biogenesis		124	6412	189	3788	Under-represented	6.28262e-14
KOG___Carbohydrate transport and metabolism		132	6404	191	3786	Under-represented	7.97344e-13
KOG0725___Reductases with broad range of substrate specificities		10	6526	55	3922	Under-represented	1.72086e-12
KOG___Signal transduction mechanisms		112	6424	168	3809	Under-represented	7.44097e-12
KOG2533___Permease of the major facilitator superfamily		2	6534	37	3940	Under-represented	1.13379e-11
KOG___Replication, recombination and repair		62	6474	110	3867	Under-represented	5.26423e-10
KOG___Coenzyme transport and metabolism		27	6509	61	3916	Under-represented	4.28449e-07
KOG1289___Amino acid transporters		0	6536	18	3959	Under-represented	3.71567e-06
KOG1238___Glucose dehydrogenase/choline dehydrogenase/mandelonitrile lyase (GMC oxidoreductase family)		0	6536	14	3963	Under-represented	0.000167276
KOG0156___Cytochrome P450 CYP2 subfamily		0	6536	14	3963	Under-represented	0.000167276
KOG___Cell cycle control, cell division, chromosome partitioning		79	6457	99	3878	Under-represented	0.000204665
KOG1869___Splicing coactivator SRm160/300, subunit SRm300		61	6475	8	3969	Over-represented	0.000269563
KOG1399___Flavin-containing monooxygenase		2	6534	17	3960	Under-represented	0.000564066
KOG___Nucleotide transport and metabolism		25	6511	46	3931	Under-represented	0.000686121
KOG___Function unknown		180	6356	175	3802	Under-represented	0.000895385
KOG1577___Aldo/keto reductase family proteins		0	6536	12	3965	Under-represented	0.000930692
KOG1216___von Willebrand factor and related coagulation proteins		29	6507	1	3976	Over-represented	0.00158331
KOG0158___Cytochrome P450 CYP3/CYP5/CYP6/CYP9 subfamilies		0	6536	10	3967	Under-represented	0.00606028
KOG1575___Voltage-gated shaker-like K+ channel, subunit beta/KCNAB		2	6534	14	3963	Under-represented	0.00606028
KOG0023___Alcohol dehydrogenase, class V		1	6535	12	3965	Under-represented	0.00692664
KOG1176___Acyl-CoA synthetase		3	6533	15	3962	Under-represented	0.0094365
KOG4157___beta-1,6-N-acetylglucosaminyltransferase, contains WSC domain		57	6479	11	3966	Over-represented	0.0120546
KOG2571___Chitin synthase/hyaluronan synthase (glycosyltransferases)		0	6536	9	3968	Under-represented	0.013538
KOG2450___Aldehyde dehydrogenase		0	6536	9	3968	Under-represented	0.013538
KOG4701___Chitinase		31	6505	3	3974	Over-represented	0.0212847
KOG1198___Zinc-binding oxidoreductase		6	6530	18	3959	Under-represented	0.0331598
KOG0024___Sorbitol dehydrogenase		1	6535	10	3967	Under-represented	0.0341689
PF07690	Major facilitator superfamily MFS-1	27	6509	149	3828	Under-represented	1.05403e-34
PF00083	General substrate transporter	5	6531	52	3925	Under-represented	4.5328e-14
PF00400	WD40 repeat	24	6512	76	3901	Under-represented	6.11472e-12
PF00106	Short-chain dehydrogenase/reductase SDR	37	6499	90	3887	Under-represented	2.33915e-11
PF00271	DNA/RNA helicase, C-terminal	15	6521	57	3920	Under-represented	4.01502e-10
PF08240	Alcohol dehydrogenase GroES-like	9	6527	44	3933	Under-represented	1.07446e-08
PF00107	Alcohol dehydrogenase, zinc-binding	9	6527	43	3934	Under-represented	1.82327e-08
PF00067	Cytochrome P450	10	6526	43	3934	Under-represented	3.9679e-08
PF00324	Amino acid permease-associated region	0	6536	23	3954	Under-represented	4.94404e-08
PF00248	Aldo/keto reductase	2	6534	28	3949	Under-represented	5.95634e-08
PF00501	AMP-dependent synthetase and ligase	6	6530	35	3942	Under-represented	9.66719e-08
PF00004	AAA ATPase, core	7	6529	35	3942	Under-represented	3.37673e-07
PF00069	Serine/threonine protein kinase-related	29	6507	64	3913	Under-represented	3.4854e-07
PF00071	Ras	1	6535	22	3955	Under-represented	1.23985e-06
PF00171	Aldehyde dehydrogenase	0	6536	18	3959	Under-represented	3.88957e-06
PF02985	HEAT	5	6531	25	3952	Under-represented	5.96275e-05
PF00732	Glucose-methanol-choline oxidoreductase, N-terminal	0	6536	15	3962	Under-represented	6.38742e-05
PF00270	DNA/RNA helicase, DEAD/DEAH box type, N-terminal	10	6526	31	3946	Under-represented	0.000133366
PF05199	Glucose-methanol-choline oxidoreductase, C-terminal	0	6536	14	3963	Under-represented	0.000151406
PF01399	Proteasome component region PCI	0	6536	13	3964	Under-represented	0.000380999
PF00005	ABC transporter-like	6	6530	24	3953	Under-represented	0.000393586
PF00160	Peptidyl-prolyl cis-trans isomerase, cyclophilin-type	0	6536	12	3965	Under-represented	0.000917315
PF00176	SNF2-related	4	6532	19	3958	Under-represented	0.00144321
PF00664	ABC transporter, transmembrane region	1	6535	13	3964	Under-represented	0.00288676
PF00153	Mitochondrial substrate carrier	11	6525	27	3950	Under-represented	0.0034588
PF00022	Actin/actin-like	0	6536	10	3967	Under-represented	0.00544174
PF00169	Pleckstrin-like	3	6533	15	3962	Under-represented	0.00888512
PF00227	20S proteasome, A and B subunits	2	6534	12	3965	Under-represented	0.0278819
PF00266	Aminotransferase, class V/Cysteine desulphurase	0	6536	8	3969	Under-represented	0.0309784
PF00899	UBA/THIF-type NAD/FAD binding fold	0	6536	8	3969	Under-represented	0.0309784
PF00125	Histone core	0	6536	8	3969	Under-represented	0.0309784
PF00180	Isocitrate/isopropylmalate dehydrogenase	0	6536	8	3969	Under-represented	0.0309784
PF00076	RNA recognition motif, RNP-1	23	6513	35	3942	Under-represented	0.0418352
PF00441	Acyl-CoA oxidase/dehydrogenase, type 1	2	6534	11	3966	Under-represented	0.0482516
PF02518	ATP-binding region, ATPase-like	6	6530	17	3960	Under-represented	0.0482516
PF00300	Phosphoglycerate mutase	2	6534	11	3966	Under-represented	0.0482516
PF01490	Amino acid transporter, transmembrane	2	6534	11	3966	Under-represented	0.0482516
Cladosporium fulvum
Annotation term	Description	# proteins in study set with annotation term	# proteins in study set without annotation term	# other proteins with annotation term	# other proteins without annotation term	Over/Under-represented	p-value
Has transmembrane domain		1268	8134	1119	3606	Under-represented	6.26778e-48
SSP		217	9185	7	4718	Over-represented	1.60427e-27
High cysteine SSP		126	9276	1	4724	Over-represented	3.65035e-19
Protease		87	9315	144	4581	Under-represented	1.91999e-17
Has signal peptide		769	8633	260	4465	Over-represented	3.03163e-07
CAZY: Carbohydrate Esterase		35	9367	0	4725	Over-represented	4.83319e-05
Secreted protease		20	9382	36	4689	Under-represented	0.000143751
CAZY: Glycosyltransferase		48	9354	56	4669	Under-represented	0.00105682
CAZY: Glycoside Hydrolase		151	9251	123	4602	Under-represented	0.00310135
MER102730 (i-AAA peptidase (Dasypus novemcinctus) )		0	9402	8	4717	Under-represented	0.00580288
CAZY		256	9146	182	4543	Under-represented	0.0126395
GO:0003674	molecular_function	2816	6586	3307	1418	Under-represented	0
GO:0008150	biological_process	1773	7629	2469	2256	Under-represented	0
all	all	3007	6395	3510	1215	Under-represented	0
GO:0003824	catalytic activity	1883	7519	2396	2329	Under-represented	3.83629e-295
GO:0008152	metabolic process	1490	7912	1801	2924	Under-represented	5.71225e-181
GO:0005623	cell	864	8538	1345	3380	Under-represented	5.97101e-181
GO:0044464	cell part	864	8538	1345	3380	Under-represented	5.97101e-181
GO:0005575	cellular_component	892	8510	1359	3366	Under-represented	3.30967e-178
GO:0005488	binding	1495	7907	1787	2938	Under-represented	8.4655e-176
GO:0009987	cellular process	1058	8344	1366	3359	Under-represented	1.36001e-141
GO:0016020	membrane	278	9124	704	4021	Under-represented	4.44267e-140
GO:0051179	localization	196	9206	613	4112	Under-represented	4.52434e-140
GO:0051234	establishment of localization	196	9206	611	4114	Under-represented	2.47451e-139
GO:0006810	transport	196	9206	610	4115	Under-represented	5.61127e-139
GO:0005215	transporter activity	163	9239	541	4184	Under-represented	2.56585e-127
GO:0016491	oxidoreductase activity	419	8983	757	3968	Under-represented	2.22222e-111
GO:0044237	cellular metabolic process	930	8472	1150	3575	Under-represented	3.35961e-107
GO:0044238	primary metabolic process	952	8450	1131	3594	Under-represented	5.05344e-98
GO:0000166	nucleotide binding	275	9127	580	4145	Under-represented	1.79386e-97
GO:0017076	purine nucleotide binding	257	9145	547	4178	Under-represented	3.03288e-92
GO:0044425	membrane part	172	9230	453	4272	Under-represented	3.55365e-90
GO:0031224	intrinsic to membrane	140	9262	398	4327	Under-represented	2.43988e-83
GO:0016021	integral to membrane	138	9264	395	4330	Under-represented	3.61124e-83
GO:0030554	adenyl nucleotide binding	240	9162	481	4244	Under-represented	4.02312e-76
GO:0032555	purine ribonucleotide binding	215	9187	450	4275	Under-represented	5.44933e-74
GO:0032553	ribonucleotide binding	215	9187	450	4275	Under-represented	5.44933e-74
GO:0022892	substrate-specific transporter activity	88	9314	303	4422	Under-represented	3.92405e-71
GO:0043170	macromolecule metabolic process	660	8742	810	3915	Under-represented	1.12001e-70
GO:0022857	transmembrane transporter activity	89	9313	303	4422	Under-represented	1.12001e-70
GO:0022804	active transmembrane transporter activity	54	9348	240	4485	Under-represented	4.41873e-64
GO:0005622	intracellular	624	8778	753	3972	Under-represented	3.23994e-63
GO:0022891	substrate-specific transmembrane transporter activity	84	9318	273	4452	Under-represented	1.06171e-61
GO:0032559	adenyl ribonucleotide binding	198	9204	385	4340	Under-represented	2.68932e-58
GO:0005524	ATP binding	198	9204	384	4341	Under-represented	4.64242e-58
GO:0005737	cytoplasm	161	9241	338	4387	Under-represented	4.81218e-55
GO:0044424	intracellular part	503	8899	617	4108	Under-represented	3.99276e-52
GO:0019538	protein metabolic process	387	9015	526	4199	Under-represented	5.43101e-52
GO:0044260	cellular macromolecule metabolic process	384	9018	509	4216	Under-represented	3.06812e-48
GO:0016614	oxidoreductase activity, acting on CH-OH group of donors	67	9335	215	4510	Under-represented	6.01639e-48
GO:0044267	cellular protein metabolic process	378	9024	497	4228	Under-represented	1.84694e-46
GO:0016787	hydrolase activity	735	8667	751	3974	Under-represented	6.82066e-45
GO:0016740	transferase activity	416	8986	516	4209	Under-represented	7.93285e-44
GO:0015075	ion transmembrane transporter activity	79	9323	215	4510	Under-represented	6.78997e-43
GO:0009058	biosynthetic process	201	9201	325	4400	Under-represented	9.7989e-40
GO:0016462	pyrophosphatase activity	117	9285	241	4484	Under-represented	3.63045e-38
GO:0016818	hydrolase activity, acting on acid anhydrides, in phosphorus-containing anhydrides	118	9284	241	4484	Under-represented	8.72713e-38
GO:0016817	hydrolase activity, acting on acid anhydrides	119	9283	241	4484	Under-represented	1.47818e-37
GO:0017111	nucleoside-triphosphatase activity	107	9295	229	4496	Under-represented	2.22331e-37
GO:0020037	heme binding	39	9363	147	4578	Under-represented	7.97944e-36
GO:0046906	tetrapyrrole binding	39	9363	147	4578	Under-represented	7.97944e-36
GO:0044444	cytoplasmic part	120	9282	232	4493	Under-represented	1.72379e-34
GO:0019752	carboxylic acid metabolic process	60	9342	169	4556	Under-represented	1.93181e-34
GO:0043283	biopolymer metabolic process	431	8971	485	4240	Under-represented	2.32457e-34
GO:0006082	organic acid metabolic process	62	9340	171	4554	Under-represented	2.72578e-34
GO:0016853	isomerase activity	40	9362	143	4582	Under-represented	7.46058e-34
GO:0016616	oxidoreductase activity, acting on the CH-OH group of donors, NAD or NADP as acceptor	61	9341	168	4557	Under-represented	1.19854e-33
GO:0032991	macromolecular complex	187	9215	290	4435	Under-represented	1.4665e-33
GO:0016861	intramolecular oxidoreductase activity, interconverting aldoses and ketoses	3	9399	81	4644	Under-represented	3.11292e-33
GO:0044249	cellular biosynthetic process	161	9241	264	4461	Under-represented	1.06977e-32
GO:0008733	L-arabinose isomerase activity	1	9401	73	4652	Under-represented	3.59066e-32
GO:0048037	cofactor binding	128	9274	231	4494	Under-represented	8.36731e-32
GO:0004497	monooxygenase activity	52	9350	150	4575	Under-represented	6.9846e-31
GO:0043234	protein complex	112	9290	212	4513	Under-represented	1.02922e-30
GO:0005506	iron ion binding	48	9354	144	4581	Under-represented	1.48857e-30
GO:0016860	intramolecular oxidoreductase activity	10	9392	90	4635	Under-represented	1.48857e-30
GO:0015291	secondary active transmembrane transporter activity	14	9388	95	4630	Under-represented	1.0952e-29
GO:0051119	sugar transmembrane transporter activity	3	9399	71	4654	Under-represented	1.16571e-28
GO:0006520	amino acid metabolic process	42	9360	131	4594	Under-represented	1.46992e-28
GO:0015295	solute:hydrogen symporter activity	3	9399	70	4655	Under-represented	3.23298e-28
GO:0005351	sugar:hydrogen symporter activity	3	9399	70	4655	Under-represented	3.23298e-28
GO:0015144	carbohydrate transmembrane transporter activity	4	9398	72	4653	Under-represented	4.78724e-28
GO:0008643	carbohydrate transport	4	9398	72	4653	Under-represented	4.78724e-28
GO:0008324	cation transmembrane transporter activity	53	9349	142	4583	Under-represented	7.19997e-28
GO:0042623	ATPase activity, coupled	63	9339	152	4573	Under-represented	1.76874e-27
GO:0008104	protein localization	23	9379	103	4622	Under-represented	2.22578e-27
GO:0006519	amino acid and derivative metabolic process	47	9355	133	4592	Under-represented	4.71904e-27
GO:0016043	cellular component organization and biogenesis	106	9296	193	4532	Under-represented	7.15349e-27
GO:0009308	amine metabolic process	56	9346	142	4583	Under-represented	8.70591e-27
GO:0033036	macromolecule localization	25	9377	104	4621	Under-represented	1.06194e-26
GO:0016887	ATPase activity	82	9320	169	4556	Under-represented	1.09689e-26
obsolete_biological_process	obsolete_biological_process	181	9221	257	4468	Under-represented	2.34399e-26
GO:0045184	establishment of protein localization	23	9379	100	4625	Under-represented	3.0831e-26
GO:0015031	protein transport	23	9379	99	4626	Under-represented	7.50668e-26
GO:0006118	electron transport	181	9221	255	4470	Under-represented	9.86494e-26
GO:0050662	coenzyme binding	83	9319	167	4558	Under-represented	9.86494e-26
GO:0051641	cellular localization	29	9373	106	4619	Under-represented	1.85923e-25
GO:0051649	establishment of cellular localization	28	9374	104	4621	Under-represented	3.36811e-25
GO:0043229	intracellular organelle	410	8992	425	4300	Under-represented	3.55431e-25
GO:0043226	organelle	410	8992	425	4300	Under-represented	3.55431e-25
GO:0008565	protein transporter activity	14	9388	81	4644	Under-represented	5.55846e-24
GO:0015294	solute:cation symporter activity	8	9394	70	4655	Under-represented	1.28564e-23
GO:0015293	symporter activity	8	9394	70	4655	Under-represented	1.28564e-23
GO:0044422	organelle part	95	9307	171	4554	Under-represented	1.46981e-23
GO:0044446	intracellular organelle part	95	9307	171	4554	Under-represented	1.46981e-23
GO:0016705	oxidoreductase activity, acting on paired donors, with incorporation or reduction of molecular oxygen	32	9370	104	4621	Under-represented	2.40503e-23
GO:0006807	nitrogen compound metabolic process	84	9318	160	4565	Under-represented	3.16883e-23
GO:0015405	P-P-bond-hydrolysis-driven transmembrane transporter activity	38	9364	109	4616	Under-represented	1.6115e-22
GO:0015399	primary active transmembrane transporter activity	38	9364	109	4616	Under-represented	1.6115e-22
GO:0016874	ligase activity	98	9304	170	4555	Under-represented	1.99356e-22
GO:0046907	intracellular transport	28	9374	96	4629	Under-represented	2.9226e-22
GO:0043167	ion binding	528	8874	487	4238	Under-represented	1.13744e-21
GO:0042626	ATPase activity, coupled to transmembrane movement of substances	37	9365	104	4621	Under-represented	3.23833e-21
GO:0043492	ATPase activity, coupled to movement of substances	37	9365	104	4621	Under-represented	3.23833e-21
GO:0046872	metal ion binding	525	8877	480	4245	Under-represented	8.15417e-21
GO:0016820	hydrolase activity, acting on acid anhydrides, catalyzing transmembrane movement of substances	38	9364	104	4621	Under-represented	1.20999e-20
GO:0006886	intracellular protein transport	18	9384	76	4649	Under-represented	1.08209e-19
GO:0016772	transferase activity, transferring phosphorus-containing groups	183	9219	230	4495	Under-represented	1.95151e-19
GO:0004386	helicase activity	35	9367	94	4631	Under-represented	2.16462e-18
GO:0043231	intracellular membrane-bounded organelle	330	9072	333	4392	Under-represented	2.36147e-18
GO:0043227	membrane-bounded organelle	330	9072	333	4392	Under-represented	2.36147e-18
GO:0008026	ATP-dependent helicase activity	32	9370	90	4635	Under-represented	2.47208e-18
GO:0016712	oxidoreductase activity, acting on paired donors, with incorporation or reduction of molecular oxygen, reduced flavin or flavoprotein as one donor, and incorporation of one atom of oxygen	0	9402	40	4685	Under-represented	2.47208e-18
GO:0050381	unspecific monooxygenase activity	0	9402	40	4685	Under-represented	2.47208e-18
GO:0007154	cell communication	59	9343	118	4607	Under-represented	4.14554e-18
GO:0019001	guanyl nucleotide binding	17	9385	70	4655	Under-represented	6.19964e-18
GO:0006139	nucleobase, nucleoside, nucleotide and nucleic acid metabolic process	385	9017	367	4358	Under-represented	1.1901e-17
GO:0043169	cation binding	503	8899	446	4279	Under-represented	1.20819e-17
GO:0005525	GTP binding	17	9385	69	4656	Under-represented	1.4565e-17
GO:0032561	guanyl ribonucleotide binding	17	9385	69	4656	Under-represented	1.4565e-17
GO:0003678	DNA helicase activity	27	9375	81	4644	Under-represented	2.66689e-17
GO:0004003	ATP-dependent DNA helicase activity	27	9375	81	4644	Under-represented	2.66689e-17
GO:0003676	nucleic acid binding	471	8931	422	4303	Under-represented	3.17815e-17
GO:0007165	signal transduction	53	9349	108	4617	Under-represented	8.16817e-17
GO:0043412	biopolymer modification	141	9261	183	4542	Under-represented	2.75877e-16
GO:0008094	DNA-dependent ATPase activity	32	9370	84	4641	Under-represented	3.37953e-16
GO:0050660	FAD binding	42	9360	95	4630	Under-represented	3.47056e-16
GO:0016301	kinase activity	132	9270	168	4557	Under-represented	1.82921e-14
GO:0005275	amine transmembrane transporter activity	2	9400	37	4688	Under-represented	1.96174e-14
GO:0015171	amino acid transmembrane transporter activity	2	9400	37	4688	Under-represented	1.96174e-14
GO:0006865	amino acid transport	2	9400	37	4688	Under-represented	1.96174e-14
GO:0015837	amine transport	2	9400	37	4688	Under-represented	1.96174e-14
GO:0004175	endopeptidase activity	52	9350	99	4626	Under-represented	2.16314e-14
GO:0006464	protein modification process	135	9267	169	4556	Under-represented	3.05595e-14
GO:0008233	peptidase activity	135	9267	169	4556	Under-represented	3.05595e-14
GO:0009059	macromolecule biosynthetic process	106	9296	146	4579	Under-represented	3.13358e-14
GO:0015849	organic acid transport	3	9399	38	4687	Under-represented	6.06645e-14
GO:0046942	carboxylic acid transport	3	9399	38	4687	Under-represented	6.06645e-14
GO:0022884	macromolecule transmembrane transporter activity	12	9390	52	4673	Under-represented	1.05325e-13
GO:0008320	protein transmembrane transporter activity	12	9390	52	4673	Under-represented	1.05325e-13
GO:0015450	P-P-bond-hydrolysis-driven protein transmembrane transporter activity	12	9390	52	4673	Under-represented	1.05325e-13
GO:0016627	oxidoreductase activity, acting on the CH-CH group of donors	27	9375	70	4655	Under-represented	1.52447e-13
GO:0042625	ATPase activity, coupled to transmembrane movement of ions	33	9369	76	4649	Under-represented	2.40402e-13
GO:0031090	organelle membrane	30	9372	72	4653	Under-represented	4.0961e-13
GO:0043687	post-translational protein modification	107	9295	141	4584	Under-represented	6.11059e-13
GO:0003724	RNA helicase activity	12	9390	50	4675	Under-represented	6.11059e-13
GO:0065003	macromolecular complex assembly	26	9376	67	4658	Under-represented	6.47627e-13
GO:0022607	cellular component assembly	29	9373	70	4655	Under-represented	8.33786e-13
GO:0006066	alcohol metabolic process	24	9378	64	4661	Under-represented	1.34712e-12
GO:0046943	carboxylic acid transmembrane transporter activity	5	9397	38	4687	Under-represented	2.28738e-12
GO:0005342	organic acid transmembrane transporter activity	5	9397	38	4687	Under-represented	2.28738e-12
GO:0043142	single-stranded DNA-dependent ATPase activity	11	9391	47	4678	Under-represented	2.37603e-12
GO:0008186	RNA-dependent ATPase activity	11	9391	47	4678	Under-represented	2.37603e-12
GO:0016773	phosphotransferase activity, alcohol group as acceptor	123	9279	151	4574	Under-represented	2.37603e-12
GO:0042624	ATPase activity, uncoupled	11	9391	47	4678	Under-represented	2.37603e-12
GO:0010467	gene expression	360	9042	318	4407	Under-represented	2.37603e-12
GO:0004004	ATP-dependent RNA helicase activity	11	9391	47	4678	Under-represented	2.37603e-12
GO:0015462	protein-transmembrane transporting ATPase activity	11	9391	47	4678	Under-represented	2.37603e-12
GO:0017116	single-stranded DNA-dependent ATP-dependent DNA helicase activity	11	9391	47	4678	Under-represented	2.37603e-12
GO:0046914	transition metal ion binding	481	8921	396	4329	Under-represented	2.37603e-12
GO:0008652	amino acid biosynthetic process	16	9386	53	4672	Under-represented	3.68833e-12
GO:0009056	catabolic process	71	9331	107	4618	Under-represented	5.76312e-12
GO:0009309	amine biosynthetic process	18	9384	54	4671	Under-represented	1.51718e-11
GO:0007264	small GTPase mediated signal transduction	18	9384	54	4671	Under-represented	1.51718e-11
GO:0044271	nitrogen compound biosynthetic process	18	9384	54	4671	Under-represented	1.51718e-11
GO:0016829	lyase activity	70	9332	104	4621	Under-represented	2.01541e-11
GO:0065009	regulation of molecular function	35	9367	72	4653	Under-represented	2.28558e-11
GO:0006412	translation	94	9308	124	4601	Under-represented	2.60986e-11
GO:0044262	cellular carbohydrate metabolic process	20	9382	55	4670	Under-represented	3.4516e-11
GO:0050790	regulation of catalytic activity	34	9368	70	4655	Under-represented	5.2896e-11
GO:0006508	proteolysis	138	9264	155	4570	Under-represented	9.46505e-11
GO:0044248	cellular catabolic process	63	9339	95	4630	Under-represented	1.19025e-10
GO:0007242	intracellular signaling cascade	29	9373	62	4663	Under-represented	2.721e-10
GO:0004316	3-oxoacyl-[acyl-carrier-protein] reductase activity	4	9398	31	4694	Under-represented	3.55786e-10
GO:0006796	phosphate metabolic process	108	9294	128	4597	Under-represented	9.1088e-10
GO:0006793	phosphorus metabolic process	108	9294	128	4597	Under-represented	9.1088e-10
GO:0043232	intracellular non-membrane-bounded organelle	103	9299	124	4601	Under-represented	9.81906e-10
GO:0043228	non-membrane-bounded organelle	103	9299	124	4601	Under-represented	9.81906e-10
GO:0016192	vesicle-mediated transport	17	9385	47	4678	Under-represented	1.30409e-09
obsolete_molecular_function	obsolete_molecular_function	88	9314	111	4614	Under-represented	1.74032e-09
GO:0016070	RNA metabolic process	223	9179	209	4516	Under-represented	1.74032e-09
GO:0005975	carbohydrate metabolic process	140	9262	150	4575	Under-represented	2.3085e-09
GO:0006260	DNA replication	9	9393	36	4689	Under-represented	3.29992e-09
GO:0009057	macromolecule catabolic process	40	9362	69	4656	Under-represented	4.33964e-09
GO:0016879	ligase activity, forming carbon-nitrogen bonds	64	9338	90	4635	Under-represented	4.33964e-09
GO:0005739	mitochondrion	23	9379	52	4673	Under-represented	4.49154e-09
GO:0004871	signal transducer activity	44	9358	72	4653	Under-represented	5.02512e-09
GO:0060089	molecular transducer activity	44	9358	72	4653	Under-represented	5.02512e-09
GO:0044429	mitochondrial part	17	9385	45	4680	Under-represented	5.82824e-09
GO:0006457	protein folding	12	9390	39	4686	Under-represented	6.44102e-09
GO:0016877	ligase activity, forming carbon-sulfur bonds	6	9396	31	4694	Under-represented	6.61216e-09
GO:0019842	vitamin binding	38	9364	66	4659	Under-represented	7.01239e-09
GO:0006790	sulfur metabolic process	1	9401	22	4703	Under-represented	8.97757e-09
GO:0006461	protein complex assembly	7	9395	32	4693	Under-represented	9.69695e-09
GO:0016651	oxidoreductase activity, acting on NADH or NADPH	15	9387	42	4683	Under-represented	1.11691e-08
GO:0005515	protein binding	317	9085	265	4460	Under-represented	1.1234e-08
GO:0006259	DNA metabolic process	50	9352	76	4649	Under-represented	1.36163e-08
GO:0006913	nucleocytoplasmic transport	4	9398	27	4698	Under-represented	1.52935e-08
GO:0051169	nuclear transport	4	9398	27	4698	Under-represented	1.52935e-08
GO:0065007	biological regulation	272	9130	235	4490	Under-represented	1.53388e-08
GO:0004842	ubiquitin-protein ligase activity	9	9393	34	4691	Under-represented	1.72737e-08
GO:0004312	fatty-acid synthase activity	9	9393	34	4691	Under-represented	1.72737e-08
GO:0050896	response to stimulus	65	9337	88	4637	Under-represented	2.00186e-08
GO:0031967	organelle envelope	21	9381	48	4677	Under-represented	2.04592e-08
GO:0030234	enzyme regulator activity	68	9334	90	4635	Under-represented	2.22931e-08
GO:0016310	phosphorylation	94	9308	110	4615	Under-represented	3.20383e-08
GO:0006811	ion transport	42	9360	67	4658	Under-represented	3.64657e-08
GO:0043086	negative regulation of catalytic activity	6	9396	29	4696	Under-represented	3.84188e-08
GO:0007049	cell cycle	15	9387	40	4685	Under-represented	4.78955e-08
GO:0019318	hexose metabolic process	10	9392	34	4691	Under-represented	4.95373e-08
GO:0044265	cellular macromolecule catabolic process	34	9368	59	4666	Under-represented	5.32058e-08
GO:0051340	regulation of ligase activity	7	9395	30	4695	Under-represented	5.38752e-08
GO:0009055	electron carrier activity	18	9384	43	4682	Under-represented	6.24345e-08
GO:0016788	hydrolase activity, acting on ester bonds	177	9225	167	4558	Under-represented	8.45532e-08
GO:0051444	negative regulation of ubiquitin-protein ligase activity	6	9396	28	4697	Under-represented	9.06106e-08
GO:0051440	regulation of ubiquitin-protein ligase activity during meiotic cell cycle	6	9396	28	4697	Under-represented	9.06106e-08
GO:0051443	positive regulation of ubiquitin-protein ligase activity	6	9396	28	4697	Under-represented	9.06106e-08
GO:0051438	regulation of ubiquitin-protein ligase activity	6	9396	28	4697	Under-represented	9.06106e-08
GO:0051351	positive regulation of ligase activity	6	9396	28	4697	Under-represented	9.06106e-08
GO:0051352	negative regulation of ligase activity	6	9396	28	4697	Under-represented	9.06106e-08
GO:0005996	monosaccharide metabolic process	12	9390	36	4689	Under-represented	1.13177e-07
GO:0019787	small conjugating protein ligase activity	12	9390	36	4689	Under-represented	1.13177e-07
GO:0006996	organelle organization and biogenesis	49	9353	71	4654	Under-represented	1.19128e-07
GO:0046903	secretion	2	9400	21	4704	Under-represented	1.7326e-07
GO:0032940	secretion by cell	2	9400	21	4704	Under-represented	1.7326e-07
GO:0004299	proteasome endopeptidase activity	1	9401	19	4706	Under-represented	1.79299e-07
GO:0006261	DNA-dependent DNA replication	1	9401	19	4706	Under-represented	1.79299e-07
GO:0031975	envelope	28	9374	52	4673	Under-represented	1.92529e-07
GO:0022402	cell cycle process	12	9390	35	4690	Under-represented	2.13887e-07
GO:0016878	acid-thiol ligase activity	4	9398	24	4701	Under-represented	2.34299e-07
GO:0051321	meiotic cell cycle	7	9395	28	4697	Under-represented	2.93078e-07
GO:0045045	secretory pathway	2	9400	20	4705	Under-represented	4.58885e-07
GO:0008812	choline dehydrogenase activity	2	9400	20	4705	Under-represented	4.58885e-07
GO:0044255	cellular lipid metabolic process	29	9373	51	4674	Under-represented	4.66168e-07
GO:0031966	mitochondrial membrane	10	9392	31	4694	Under-represented	5.48632e-07
GO:0006732	coenzyme metabolic process	23	9379	45	4680	Under-represented	5.53465e-07
GO:0006399	tRNA metabolic process	23	9379	45	4680	Under-represented	5.53465e-07
GO:0005634	nucleus	285	9117	232	4493	Under-represented	5.76792e-07
GO:0017171	serine hydrolase activity	31	9371	52	4673	Under-represented	8.35597e-07
GO:0008236	serine-type peptidase activity	31	9371	52	4673	Under-represented	8.35597e-07
GO:0043085	positive regulation of catalytic activity	8	9394	28	4697	Under-represented	8.58924e-07
GO:0004673	protein histidine kinase activity	3	9399	21	4704	Under-represented	8.68452e-07
GO:0016775	phosphotransferase activity, nitrogenous group as acceptor	3	9399	21	4704	Under-represented	8.68452e-07
GO:0000155	two-component sensor activity	3	9399	21	4704	Under-represented	8.68452e-07
GO:0009064	glutamine family amino acid metabolic process	5	9397	24	4701	Under-represented	8.68452e-07
GO:0012505	endomembrane system	17	9385	38	4687	Under-represented	9.87347e-07
GO:0051186	cofactor metabolic process	30	9372	51	4674	Under-represented	1.02969e-06
GO:0030170	pyridoxal phosphate binding	19	9383	40	4685	Under-represented	1.1538e-06
GO:0004298	threonine endopeptidase activity	2	9400	19	4706	Under-represented	1.17256e-06
GO:0016796	exonuclease activity, active with either ribo- or deoxyribonucleic acids and producing 5'-phosphomonoesters	4	9398	22	4703	Under-represented	1.42486e-06
GO:0005743	mitochondrial inner membrane	7	9395	26	4699	Under-represented	1.55007e-06
GO:0019866	organelle inner membrane	7	9395	26	4699	Under-represented	1.55007e-06
GO:0016903	oxidoreductase activity, acting on the aldehyde or oxo group of donors	12	9390	32	4693	Under-represented	1.66684e-06
GO:0003924	GTPase activity	12	9390	32	4693	Under-represented	1.66684e-06
GO:0006468	protein amino acid phosphorylation	78	9324	89	4636	Under-represented	1.75241e-06
GO:0004672	protein kinase activity	100	9302	105	4620	Under-represented	1.75241e-06
GO:0005509	calcium ion binding	22	9380	42	4683	Under-represented	2.1069e-06
GO:0005740	mitochondrial envelope	15	9387	35	4690	Under-represented	2.20049e-06
GO:0016757	transferase activity, transferring glycosyl groups	41	9361	59	4666	Under-represented	2.25622e-06
GO:0044272	sulfur compound biosynthetic process	0	9402	14	4711	Under-represented	2.76702e-06
GO:0008047	enzyme activator activity	44	9358	61	4664	Under-represented	2.78239e-06
GO:0016746	transferase activity, transferring acyl groups	98	9304	103	4622	Under-represented	2.80336e-06
GO:0016791	phosphoric monoester hydrolase activity	32	9370	51	4674	Under-represented	2.9616e-06
GO:0016836	hydro-lyase activity	23	9379	43	4682	Under-represented	3.00105e-06
GO:0000160	two-component signal transduction system (phosphorelay)	4	9398	21	4704	Under-represented	3.38462e-06
GO:0030117	membrane coat	4	9398	21	4704	Under-represented	3.38462e-06
GO:0048475	coated membrane	4	9398	21	4704	Under-represented	3.38462e-06
GO:0018193	peptidyl-amino acid modification	4	9398	21	4704	Under-represented	3.38462e-06
GO:0016709	oxidoreductase activity, acting on paired donors, with incorporation or reduction of molecular oxygen, NADH or NADPH as one donor, and incorporation of one atom of oxygen	24	9378	43	4682	Under-represented	4.01235e-06
GO:0006629	lipid metabolic process	51	9351	66	4659	Under-represented	4.12989e-06
GO:0017110	nucleoside-diphosphatase activity	15	9387	34	4691	Under-represented	4.14753e-06
GO:0006281	DNA repair	26	9376	45	4680	Under-represented	4.33593e-06
GO:0006396	RNA processing	34	9368	52	4673	Under-represented	4.8734e-06
GO:0016405	CoA-ligase activity	3	9399	19	4706	Under-represented	5.34153e-06
GO:0006974	response to DNA damage stimulus	27	9375	45	4680	Under-represented	6.02213e-06
GO:0009719	response to endogenous stimulus	27	9375	45	4680	Under-represented	6.02213e-06
GO:0004289	subtilase activity	6	9396	23	4702	Under-represented	6.30613e-06
GO:0000096	sulfur amino acid metabolic process	0	9402	13	4712	Under-represented	7.74955e-06
GO:0004222	metalloendopeptidase activity	7	9395	24	4701	Under-represented	7.83467e-06
GO:0003723	RNA binding	43	9359	58	4667	Under-represented	8.81542e-06
GO:0003677	DNA binding	267	9135	211	4514	Under-represented	8.91219e-06
GO:0004551	nucleotide diphosphatase activity	17	9385	35	4690	Under-represented	9.73732e-06
GO:0016758	transferase activity, transferring hexosyl groups	29	9373	46	4679	Under-represented	1.02261e-05
GO:0004252	serine-type endopeptidase activity	13	9389	31	4694	Under-represented	1.09309e-05
GO:0008415	acyltransferase activity	82	9320	88	4637	Under-represented	1.20242e-05
GO:0004532	exoribonuclease activity	3	9399	18	4707	Under-represented	1.31577e-05
GO:0003960	NADPH:quinone reductase activity	3	9399	18	4707	Under-represented	1.31577e-05
GO:0016896	exoribonuclease activity, producing 5'-phosphomonoesters	3	9399	18	4707	Under-represented	1.31577e-05
GO:0018202	peptidyl-histidine modification	3	9399	18	4707	Under-represented	1.31577e-05
GO:0044275	cellular carbohydrate catabolic process	12	9390	29	4696	Under-represented	1.38003e-05
GO:0010181	FMN binding	6	9396	22	4703	Under-represented	1.43537e-05
GO:0016620	oxidoreductase activity, acting on the aldehyde or oxo group of donors, NAD or NADP as acceptor	10	9392	27	4698	Under-represented	1.45692e-05
GO:0043141	ATP-dependent 5'-3' DNA helicase activity	15	9387	32	4693	Under-represented	1.49942e-05
GO:0008758	UDP-2,3-diacylglucosamine hydrolase activity	15	9387	32	4693	Under-represented	1.49942e-05
GO:0008413	8-oxo-7,8-dihydroguanine triphosphatase activity	15	9387	32	4693	Under-represented	1.49942e-05
GO:0004787	thiamin-pyrophosphatase activity	15	9387	32	4693	Under-represented	1.49942e-05
GO:0019176	dihydroneopterin monophosphate phosphatase activity	15	9387	32	4693	Under-represented	1.49942e-05
GO:0019177	dihydroneopterin triphosphate pyrophosphohydrolase activity	15	9387	32	4693	Under-represented	1.49942e-05
GO:0008828	dATP pyrophosphohydrolase activity	15	9387	32	4693	Under-represented	1.49942e-05
GO:0000810	diacylglycerol pyrophosphate phosphatase activity	15	9387	32	4693	Under-represented	1.49942e-05
GO:0043139	5'-3' DNA helicase activity	15	9387	32	4693	Under-represented	1.49942e-05
GO:0030529	ribonucleoprotein complex	81	9321	86	4639	Under-represented	1.50459e-05
GO:0004713	protein-tyrosine kinase activity	57	9345	68	4657	Under-represented	1.5419e-05
GO:0016835	carbon-oxygen lyase activity	33	9369	49	4676	Under-represented	1.56811e-05
GO:0016628	oxidoreductase activity, acting on the CH-CH group of donors, NAD or NADP as acceptor	7	9395	23	4702	Under-represented	1.67365e-05
GO:0008796	bis(5'-nucleosyl)-tetraphosphatase activity	17	9385	34	4691	Under-represented	1.68512e-05
GO:0043038	amino acid activation	13	9389	30	4695	Under-represented	1.87002e-05
GO:0043039	tRNA aminoacylation	13	9389	30	4695	Under-represented	1.87002e-05
GO:0004721	phosphoprotein phosphatase activity	13	9389	30	4695	Under-represented	1.87002e-05
GO:0006418	tRNA aminoacylation for protein translation	13	9389	30	4695	Under-represented	1.87002e-05
GO:0055086	nucleobase, nucleoside and nucleotide metabolic process	41	9361	55	4670	Under-represented	2.02777e-05
GO:0043285	biopolymer catabolic process	30	9372	46	4679	Under-represented	2.02826e-05
GO:0015205	nucleobase transmembrane transporter activity	0	9402	12	4713	Under-represented	2.06056e-05
GO:0004527	exonuclease activity	11	9391	27	4698	Under-represented	2.67727e-05
GO:0032787	monocarboxylic acid metabolic process	11	9391	27	4698	Under-represented	2.67727e-05
GO:0016810	hydrolase activity, acting on carbon-nitrogen (but not peptide) bonds	45	9357	58	4667	Under-represented	2.69624e-05
GO:0006812	cation transport	36	9366	50	4675	Under-represented	3.00959e-05
GO:0018106	peptidyl-histidine phosphorylation	3	9399	17	4708	Under-represented	3.07368e-05
GO:0005829	cytosol	6	9396	21	4704	Under-represented	3.07368e-05
GO:0016769	transferase activity, transferring nitrogenous groups	9	9393	25	4700	Under-represented	3.07368e-05
GO:0004090	carbonyl reductase (NADPH) activity	3	9399	17	4708	Under-represented	3.07368e-05
GO:0044445	cytosolic part	6	9396	21	4704	Under-represented	3.07368e-05
GO:0019200	carbohydrate kinase activity	13	9389	29	4696	Under-represented	3.42678e-05
GO:0008610	lipid biosynthetic process	16	9386	32	4693	Under-represented	3.58638e-05
GO:0047429	nucleoside-triphosphate diphosphatase activity	16	9386	32	4693	Under-represented	3.58638e-05
GO:0008483	transaminase activity	7	9395	22	4703	Under-represented	3.62303e-05
GO:0000156	two-component response regulator activity	4	9398	18	4707	Under-represented	4.38026e-05
GO:0016207	4-coumarate-CoA ligase activity	2	9400	15	4710	Under-represented	4.70087e-05
GO:0030163	protein catabolic process	22	9380	37	4688	Under-represented	5.11026e-05
GO:0051246	regulation of protein metabolic process	11	9391	26	4699	Under-represented	5.36969e-05
GO:0006006	glucose metabolic process	10	9392	25	4700	Under-represented	5.46828e-05
GO:0016779	nucleotidyltransferase activity	42	9360	54	4671	Under-represented	5.71003e-05
GO:0004534	5'-3' exoribonuclease activity	0	9402	11	4714	Under-represented	5.74668e-05
GO:0008409	5'-3' exonuclease activity	0	9402	11	4714	Under-represented	5.74668e-05
GO:0006084	acetyl-CoA metabolic process	0	9402	11	4714	Under-represented	5.74668e-05
GO:0033961	cis-stilbene-oxide hydrolase activity	0	9402	11	4714	Under-represented	5.74668e-05
GO:0009081	branched chain family amino acid metabolic process	1	9401	13	4712	Under-represented	6.13498e-05
GO:0008471	laccase activity	1	9401	13	4712	Under-represented	6.13498e-05
GO:0015932	nucleobase, nucleoside, nucleotide and nucleic acid transmembrane transporter activity	1	9401	13	4712	Under-represented	6.13498e-05
GO:0044428	nuclear part	29	9373	43	4682	Under-represented	6.68919e-05
GO:0016655	oxidoreductase activity, acting on NADH or NADPH, quinone or similar compound as acceptor	8	9394	23	4702	Under-represented	7.11606e-05
GO:0006752	group transfer coenzyme metabolic process	3	9399	16	4709	Under-represented	7.31605e-05
GO:0005794	Golgi apparatus	3	9399	16	4709	Under-represented	7.31605e-05
GO:0006605	protein targeting	7	9395	21	4704	Under-represented	7.8654e-05
GO:0046483	heterocycle metabolic process	19	9383	33	4692	Under-represented	0.000104327
GO:0016747	transferase activity, transferring groups other than amino-acyl groups	92	9310	89	4636	Under-represented	0.000108159
GO:0018588	tri-n-butyltin dioxygenase activity	2	9400	14	4711	Under-represented	0.000111465
GO:0018589	di-n-butyltin dioxygenase activity	2	9400	14	4711	Under-represented	0.000111465
GO:0018586	mono-butyltin dioxygenase activity	2	9400	14	4711	Under-represented	0.000111465
GO:0018587	limonene 8-monooxygenase activity	2	9400	14	4711	Under-represented	0.000111465
GO:0018585	fluorene oxygenase activity	2	9400	14	4711	Under-represented	0.000111465
GO:0018600	alpha-pinene dehydrogenase activity	2	9400	14	4711	Under-represented	0.000111465
GO:0018599	2-hydroxyisobutyrate 3-monooxygenase activity	2	9400	14	4711	Under-represented	0.000111465
GO:0018598	hydroxymethylsilanetriol oxidase activity	2	9400	14	4711	Under-represented	0.000111465
GO:0018591	methyl tertiary butyl ether 3-monooxygenase activity	2	9400	14	4711	Under-represented	0.000111465
GO:0018590	methylsilanetriol hydroxylase activity	2	9400	14	4711	Under-represented	0.000111465
GO:0018593	4-chlorophenoxyacetate monooxygenase activity	2	9400	14	4711	Under-represented	0.000111465
GO:0018592	4-nitrocatechol 4-monooxygenase activity	2	9400	14	4711	Under-represented	0.000111465
GO:0018595	alpha-pinene monooxygenase activity	2	9400	14	4711	Under-represented	0.000111465
GO:0018594	tert-butyl alcohol 2-monooxygenase activity	2	9400	14	4711	Under-represented	0.000111465
GO:0018597	ammonia monooxygenase activity	2	9400	14	4711	Under-represented	0.000111465
GO:0018596	dimethylsilanediol hydroxylase activity	2	9400	14	4711	Under-represented	0.000111465
GO:0043823	spheroidene monooxygenase activity	2	9400	14	4711	Under-represented	0.000111465
GO:0016875	ligase activity, forming carbon-oxygen bonds	16	9386	30	4695	Under-represented	0.000111465
GO:0016876	ligase activity, forming aminoacyl-tRNA and related compounds	16	9386	30	4695	Under-represented	0.000111465
GO:0015923	mannosidase activity	2	9400	14	4711	Under-represented	0.000111465
GO:0004812	aminoacyl-tRNA ligase activity	16	9386	30	4695	Under-represented	0.000111465
GO:0015297	antiporter activity	6	9396	19	4706	Under-represented	0.000146609
GO:0015980	energy derivation by oxidation of organic compounds	1	9401	12	4713	Under-represented	0.000154178
GO:0009109	coenzyme catabolic process	0	9402	10	4715	Under-represented	0.000154178
GO:0043623	cellular protein complex assembly	1	9401	12	4713	Under-represented	0.000154178
GO:0051187	cofactor catabolic process	0	9402	10	4715	Under-represented	0.000154178
GO:0009063	amino acid catabolic process	1	9401	12	4713	Under-represented	0.000154178
GO:0006099	tricarboxylic acid cycle	0	9402	10	4715	Under-represented	0.000154178
GO:0004040	amidase activity	0	9402	10	4715	Under-represented	0.000154178
GO:0046356	acetyl-CoA catabolic process	0	9402	10	4715	Under-represented	0.000154178
GO:0044431	Golgi apparatus part	3	9399	15	4710	Under-represented	0.000168366
GO:0009084	glutamine family amino acid biosynthetic process	3	9399	15	4710	Under-represented	0.000168366
GO:0016830	carbon-carbon lyase activity	21	9381	34	4691	Under-represented	0.000171278
GO:0042221	response to chemical stimulus	23	9379	36	4689	Under-represented	0.000172398
GO:0006950	response to stress	50	9352	58	4667	Under-represented	0.000177335
GO:0003887	DNA-directed DNA polymerase activity	10	9392	23	4702	Under-represented	0.000204325
GO:0042578	phosphoric ester hydrolase activity	54	9348	60	4665	Under-represented	0.000204325
GO:0065008	regulation of biological quality	10	9392	23	4702	Under-represented	0.000204325
GO:0034061	DNA polymerase activity	10	9392	23	4702	Under-represented	0.000204325
GO:0005198	structural molecule activity	75	9327	75	4650	Under-represented	0.000224959
GO:0005057	receptor signaling protein activity	24	9378	36	4689	Under-represented	0.000229504
GO:0015931	nucleobase, nucleoside, nucleotide and nucleic acid transport	2	9400	13	4712	Under-represented	0.000277563
GO:0016881	acid-amino acid ligase activity	48	9354	55	4670	Under-represented	0.000291638
GO:0016051	carbohydrate biosynthetic process	6	9396	18	4707	Under-represented	0.000317685
GO:0022613	ribonucleoprotein complex biogenesis and assembly	18	9384	30	4695	Under-represented	0.000363474
GO:0016765	transferase activity, transferring alkyl or aryl (other than methyl) groups	22	9380	34	4691	Under-represented	0.000372641
GO:0006096	glycolysis	3	9399	14	4711	Under-represented	0.000406742
GO:0016811	hydrolase activity, acting on carbon-nitrogen (but not peptide) bonds, in linear amides	15	9387	27	4698	Under-represented	0.000424197
GO:0030118	clathrin coat	0	9402	9	4716	Under-represented	0.000428171
GO:0000097	sulfur amino acid biosynthetic process	0	9402	9	4716	Under-represented	0.000428171
GO:0051082	unfolded protein binding	9	9393	21	4704	Under-represented	0.000428171
GO:0031982	vesicle	0	9402	9	4716	Under-represented	0.000428171
GO:0031988	membrane-bounded vesicle	0	9402	9	4716	Under-represented	0.000428171
GO:0031410	cytoplasmic vesicle	0	9402	9	4716	Under-represented	0.000428171
GO:0018667	cyclohexanone monooxygenase activity	0	9402	9	4716	Under-represented	0.000428171
GO:0019131	tripeptidyl-peptidase I activity	0	9402	9	4716	Under-represented	0.000428171
GO:0016023	cytoplasmic membrane-bounded vesicle	0	9402	9	4716	Under-represented	0.000428171
GO:0005798	Golgi-associated vesicle	0	9402	9	4716	Under-represented	0.000428171
GO:0006753	nucleoside phosphate metabolic process	35	9367	44	4681	Under-represented	0.000482785
GO:0009117	nucleotide metabolic process	35	9367	44	4681	Under-represented	0.000482785
GO:0004185	serine carboxypeptidase activity	4	9398	15	4710	Under-represented	0.000504059
GO:0043413	biopolymer glycosylation	4	9398	15	4710	Under-represented	0.000504059
GO:0015300	solute:solute antiporter activity	4	9398	15	4710	Under-represented	0.000504059
GO:0015299	solute:hydrogen antiporter activity	4	9398	15	4710	Under-represented	0.000504059
GO:0015298	solute:cation antiporter activity	4	9398	15	4710	Under-represented	0.000504059
GO:0006512	ubiquitin cycle	4	9398	15	4710	Under-represented	0.000504059
GO:0005543	phospholipid binding	4	9398	15	4710	Under-represented	0.000504059
GO:0030295	protein kinase activator activity	36	9366	44	4681	Under-represented	0.000586087
GO:0019209	kinase activator activity	36	9366	44	4681	Under-represented	0.000586087
GO:0006007	glucose catabolic process	10	9392	22	4703	Under-represented	0.00066605
GO:0019320	hexose catabolic process	10	9392	22	4703	Under-represented	0.00066605
GO:0046365	monosaccharide catabolic process	10	9392	22	4703	Under-represented	0.00066605
GO:0005839	proteasome core complex	2	9400	12	4713	Under-represented	0.000667382
GO:0000502	proteasome complex	2	9400	12	4713	Under-represented	0.000667382
GO:0000786	nucleosome	2	9400	12	4713	Under-represented	0.000667382
GO:0005840	ribosome	62	9340	63	4662	Under-represented	0.000670375
GO:0003735	structural constituent of ribosome	62	9340	63	4662	Under-represented	0.000670375
GO:0050789	regulation of biological process	237	9165	176	4549	Under-represented	0.000672961
GO:0009165	nucleotide biosynthetic process	23	9379	33	4692	Under-represented	0.000757521
GO:0022890	inorganic cation transmembrane transporter activity	38	9364	45	4680	Under-represented	0.000773683
GO:0016229	steroid dehydrogenase activity	12	9390	23	4702	Under-represented	0.000817732
GO:0005083	small GTPase regulator activity	12	9390	23	4702	Under-represented	0.000817732
GO:0004448	isocitrate dehydrogenase activity	8	9394	19	4706	Under-represented	0.000869296
GO:0015238	drug transporter activity	3	9399	13	4712	Under-represented	0.000916915
GO:0015893	drug transport	3	9399	13	4712	Under-represented	0.000916915
GO:0042493	response to drug	3	9399	13	4712	Under-represented	0.000916915
GO:0016682	oxidoreductase activity, acting on diphenols and related substances as donors, oxygen as acceptor	3	9399	13	4712	Under-represented	0.000916915
GO:0008194	UDP-glycosyltransferase activity	16	9386	27	4698	Under-represented	0.000921984
GO:0033764	steroid dehydrogenase activity, acting on the CH-OH group of donors, NAD or NADP as acceptor	11	9391	22	4703	Under-represented	0.000925728
GO:0046164	alcohol catabolic process	11	9391	22	4703	Under-represented	0.000925728
GO:0009072	aromatic amino acid family metabolic process	7	9395	18	4707	Under-represented	0.000980112
GO:0009060	aerobic respiration	1	9401	10	4715	Under-represented	0.000998924
GO:0045333	cellular respiration	1	9401	10	4715	Under-represented	0.000998924
GO:0000059	protein import into nucleus, docking	1	9401	10	4715	Under-represented	0.000998924
GO:0009636	response to toxin	1	9401	10	4715	Under-represented	0.000998924
GO:0008240	tripeptidyl-peptidase activity	1	9401	10	4715	Under-represented	0.000998924
GO:0004727	prenylated protein tyrosine phosphatase activity	1	9401	10	4715	Under-represented	0.000998924
GO:0030662	coated vesicle membrane	0	9402	8	4717	Under-represented	0.00114775
GO:0012506	vesicle membrane	0	9402	8	4717	Under-represented	0.00114775
GO:0030659	cytoplasmic vesicle membrane	0	9402	8	4717	Under-represented	0.00114775
GO:0030120	vesicle coat	0	9402	8	4717	Under-represented	0.00114775
GO:0030135	coated vesicle	0	9402	8	4717	Under-represented	0.00114775
GO:0044433	cytoplasmic vesicle part	0	9402	8	4717	Under-represented	0.00114775
GO:0004029	aldehyde dehydrogenase (NAD) activity	0	9402	8	4717	Under-represented	0.00114775
GO:0006887	exocytosis	0	9402	8	4717	Under-represented	0.00114775
GO:0016052	carbohydrate catabolic process	19	9383	29	4696	Under-represented	0.00118482
GO:0003995	acyl-CoA dehydrogenase activity	5	9397	15	4710	Under-represented	0.00126143
GO:0019113	limonene monooxygenase activity	5	9397	15	4710	Under-represented	0.00126143
GO:0004725	protein tyrosine phosphatase activity	5	9397	15	4710	Under-represented	0.00126143
GO:0008238	exopeptidase activity	24	9378	33	4692	Under-represented	0.00136539
GO:0004716	receptor signaling protein tyrosine kinase activity	24	9378	33	4692	Under-represented	0.00136539
GO:0005694	chromosome	22	9380	31	4694	Under-represented	0.00147442
GO:0004428	inositol or phosphatidylinositol kinase activity	16	9386	26	4699	Under-represented	0.0015016
GO:0000175	3'-5'-exoribonuclease activity	2	9400	11	4714	Under-represented	0.00156698
GO:0051170	nuclear import	2	9400	11	4714	Under-represented	0.00156698
GO:0006606	protein import into nucleus	2	9400	11	4714	Under-represented	0.00156698
GO:0004558	alpha-glucosidase activity	2	9400	11	4714	Under-represented	0.00156698
GO:0019887	protein kinase regulator activity	38	9364	44	4681	Under-represented	0.00158062
GO:0019207	kinase regulator activity	38	9364	44	4681	Under-represented	0.00158062
GO:0000252	C-3 sterol dehydrogenase (C-4 sterol decarboxylase) activity	8	9394	18	4707	Under-represented	0.00163271
GO:0004180	carboxypeptidase activity	11	9391	21	4704	Under-represented	0.00164068
GO:0008135	translation factor activity, nucleic acid binding	11	9391	21	4704	Under-represented	0.00164068
GO:0045182	translation regulator activity	11	9391	21	4704	Under-represented	0.00164068
GO:0001727	lipid kinase activity	13	9389	23	4702	Under-represented	0.00178568
GO:0006334	nucleosome assembly	3	9399	12	4713	Under-represented	0.00205462
GO:0035091	phosphoinositide binding	3	9399	12	4713	Under-represented	0.00205462
GO:0009310	amine catabolic process	3	9399	12	4713	Under-represented	0.00205462
GO:0044270	nitrogen compound catabolic process	3	9399	12	4713	Under-represented	0.00205462
GO:0006323	DNA packaging	6	9396	16	4709	Under-represented	0.00221554
GO:0016884	carbon-nitrogen ligase activity, with glutamine as amido-N-donor	12	9390	22	4703	Under-represented	0.00237056
GO:0035173	histone kinase activity	1	9401	9	4716	Under-represented	0.0024628
GO:0019748	secondary metabolic process	1	9401	9	4716	Under-represented	0.0024628
GO:0004457	lactate dehydrogenase activity	1	9401	9	4716	Under-represented	0.0024628
GO:0018110	histone arginine kinase activity	1	9401	9	4716	Under-represented	0.0024628
GO:0003690	double-stranded DNA binding	1	9401	9	4716	Under-represented	0.0024628
GO:0004249	stromelysin 3 activity	1	9401	9	4716	Under-represented	0.0024628
GO:0030001	metal ion transport	16	9386	25	4700	Under-represented	0.0024628
GO:0030695	GTPase regulator activity	16	9386	25	4700	Under-represented	0.0024628
GO:0008133	collagenase activity	1	9401	9	4716	Under-represented	0.0024628
GO:0030402	matrilysin-2 activity	1	9401	9	4716	Under-represented	0.0024628
GO:0006091	generation of precursor metabolites and energy	16	9386	25	4700	Under-represented	0.0024628
GO:0016898	oxidoreductase activity, acting on the CH-OH group of donors, cytochrome as acceptor	1	9401	9	4716	Under-represented	0.0024628
GO:0042440	pigment metabolic process	1	9401	9	4716	Under-represented	0.0024628
GO:0004054	arginine kinase activity	1	9401	9	4716	Under-represented	0.0024628
GO:0008319	prenyl protein specific endopeptidase activity	1	9401	9	4716	Under-represented	0.0024628
GO:0046527	glucosyltransferase activity	9	9393	19	4706	Under-represented	0.00249372
GO:0042592	homeostatic process	9	9393	19	4706	Under-represented	0.00249372
GO:0035251	UDP-glucosyltransferase activity	9	9393	19	4706	Under-represented	0.00249372
GO:0004518	nuclease activity	49	9353	51	4674	Under-represented	0.00259122
GO:0009110	vitamin biosynthetic process	5	9397	14	4711	Under-represented	0.00259122
GO:0042364	water-soluble vitamin biosynthetic process	5	9397	14	4711	Under-represented	0.00259122
GO:0004024	alcohol dehydrogenase activity, zinc-dependent	5	9397	14	4711	Under-represented	0.00259122
GO:0004025	alcohol dehydrogenase activity, iron-dependent	5	9397	14	4711	Under-represented	0.00259122
GO:0004022	alcohol dehydrogenase activity	5	9397	14	4711	Under-represented	0.00259122
GO:0004023	alcohol dehydrogenase activity, metal ion-independent	5	9397	14	4711	Under-represented	0.00259122
GO:0009123	nucleoside monophosphate metabolic process	5	9397	14	4711	Under-represented	0.00259122
GO:0009124	nucleoside monophosphate biosynthetic process	5	9397	14	4711	Under-represented	0.00259122
GO:0004033	aldo-keto reductase activity	11	9391	20	4705	Under-represented	0.00291461
GO:0000287	magnesium ion binding	13	9389	22	4703	Under-represented	0.00297112
GO:0022406	membrane docking	0	9402	7	4718	Under-represented	0.00297346
GO:0008678	2-deoxy-D-gluconate 3-dehydrogenase activity	0	9402	7	4718	Under-represented	0.00297346
GO:0003988	acetyl-CoA C-acyltransferase activity	0	9402	7	4718	Under-represented	0.00297346
GO:0015939	pantothenate metabolic process	0	9402	7	4718	Under-represented	0.00297346
GO:0048278	vesicle docking	0	9402	7	4718	Under-represented	0.00297346
GO:0030119	AP-type membrane coat adaptor complex	0	9402	7	4718	Under-represented	0.00297346
GO:0030131	clathrin adaptor complex	0	9402	7	4718	Under-represented	0.00297346
GO:0004339	glucan 1,4-alpha-glucosidase activity	63	9339	11	4714	Over-represented	0.00297346
[truncated: 13,440 more rows]
