# Supplementary material for: Diverse Lifestyles and Strategies of Plant Pathogenesis Encoded in the Genomes of Eighteen Dothideomycetes Fungi
Source: PLoS Pathog. 2012 Dec 6;8(12):e1003037. doi: 10.1371/journal.ppat.1003037 (PMC3516569; doi:10.1371/journal.ppat.1003037)
Supplement: Table S14 — PFAM domains that are expanded or depleted in the various comparisons in Table 3 . In each comparison the organisms are marked as part of either the in-group or the out-group. Note that each comparison has its own tab. (XLS) [file ppat.1003037.s023.xls]

## Sheet: Dothids_versus_all_outgroups
Domain	Description	Altbr1 (in)	Bauco1 (in)	Clafu1 (in)	CocheC5_3 (in)	CocheC4_1 (in)	Cocsa1 (in)	Dotse1 (in)	Hyspu1 (in)	Lepmu1 (in)	Mycfi2 (in)	Mycgr3 (in)	Pyrtt1 (in)	Pyrtr1 (in)	Rhyru1 (in)	Sepmu1 (in)	Seppo1 (in)	Settu1 (in)	Stano2 (in)	Aspnid1 (out)	Botci1 (out)	Chagl_1 (out)	Fusgr1 (out)	Fusox1 (out)	Maggr1 (out)	Necha2 (out)	Neucr1 (out)	Sacce1 (out)	Sclsc1 (out)	Trire2 (out)	Verda1 (out)	Copci1 (out)	Cryne_H99_1 (out)	Lacbi2 (out)	Mellp1 (out)	Phchr1 (out)	Pospl1 (out)	Pucgr1 (out)	Schco2 (out)	Ustma1 (out)	P-value (Wilcox, two-sided and adjusted with BH)	P-value (T-test, two-sided and adjusted with BH)	Unique/absent in ingroup	Over/under-represented in ingroup
PF04952.5	AstE_AspA	1	0	1	1	1	1	0	0	1	1	1	1	1	0	1	1	1	1	0	0	0	0	0	0	0	0	0	0	0	0	0	0	0	0	0	0	0	0	0	0.000230743	6.29024e-05	Unique	Over-represented
PF01863.8	DUF45	1	0	0	1	1	1	0	0	1	0	0	1	1	0	0	1	1	1	0	0	0	0	0	0	0	0	0	0	0	0	0	0	0	0	0	0	0	0	0	0.00370556	0.00618025	Unique	Over-represented
PF03928.5	DUF336	3	3	2	3	3	3	3	3	3	3	3	2	2	2	3	2	3	3	0	1	0	1	1	1	2	0	1	0	1	1	0	0	0	0	0	0	0	0	1	4.08787e-05	4.61174e-12		Over-represented
PF02493.11	MORN	1	1	1	1	1	1	1	1	1	1	0	1	1	1	1	1	1	1	1	0	0	0	0	0	0	0	0	0	0	0	0	0	1	0	0	0	0	0	0	9.81513e-05	8.80415e-09		Over-represented
PF05637.3	Glyco_transf_34	4	3	6	5	5	7	5	4	6	4	5	6	6	3	5	3	4	5	2	2	2	2	3	2	2	3	2	2	2	3	0	0	0	0	0	0	0	0	0	8.50604e-05	3.83748e-08		Over-represented
PF00875.9	DNA_photolyase	3	3	3	3	3	3	3	3	3	3	3	3	3	3	3	3	3	3	1	1	0	2	1	2	2	1	1	1	2	2	1	0	0	1	1	1	2	1	2	3.37118e-05	6.39999e-08		Over-represented
PF00588.10	SpoU_methylase	2	2	2	2	2	2	2	2	2	2	2	2	2	2	2	2	2	2	1	1	1	1	1	1	1	1	2	1	1	1	0	0	0	0	0	0	0	0	0	4.08787e-05	4.80157e-07		Over-represented
PF03441.5	FAD_binding_7	2	4	4	4	4	4	4	3	4	4	4	4	4	3	4	4	4	4	1	2	0	2	2	3	3	2	1	2	2	3	1	0	0	2	1	1	2	1	4	0.000230743	2.53325e-06		Over-represented
PF08588.1	DUF1769	3	2	2	2	2	2	2	2	1	2	2	2	2	2	2	2	2	2	1	1	1	1	1	1	1	1	0	1	1	0	1	1	1	2	1	1	2	1	2	0.000346765	8.84e-06		Over-represented
PF00072.15	Response_reg	20	17	21	27	25	25	25	18	22	18	24	26	24	19	22	21	25	22	19	18	11	18	22	13	15	14	4	22	13	16	8	10	7	10	9	15	7	12	11	0.000509794	8.84e-06		Over-represented
PF00512.16	HisKA	15	14	16	22	20	22	22	16	19	14	20	23	22	16	18	16	21	16	14	17	8	15	19	10	11	11	1	15	10	13	4	7	4	6	6	9	4	9	5	0.000509794	8.84e-06		Over-represented
PF04119.3	HSP9_HSP12	2	1	2	2	2	2	2	2	1	2	1	2	2	2	1	1	2	2	1	0	0	0	0	0	0	0	1	1	0	0	1	2	0	0	0	0	0	2	1	0.000524999	8.84e-06		Over-represented
PF02518.17	HATPase_c	26	22	27	30	28	28	30	23	27	23	28	31	30	24	27	26	29	25	23	21	14	22	30	18	19	18	7	25	18	21	14	14	11	13	15	12	11	17	10	0.000505758	8.85024e-06		Over-represented
PF00989.15	PAS	4	3	2	6	6	4	2	4	5	3	4	5	7	4	3	3	7	5	1	2	1	1	3	1	2	2	1	2	3	1	0	1	1	1	0	0	1	1	1	0.000165449	1.29654e-05		Over-represented
PF04564.6	U-box	2	4	3	3	3	3	3	3	3	3	2	4	3	3	3	3	2	3	2	2	1	2	2	2	2	2	2	3	2	2	2	2	1	1	2	1	2	2	2	0.000419797	2.52095e-05		Over-represented
PF09347.1	DUF1989	1	2	3	3	3	2	3	4	1	1	2	2	3	3	3	3	3	3	1	0	1	2	2	1	3	1	0	0	1	1	0	0	0	0	0	0	0	1	1	0.000650578	2.52095e-05		Over-represented
PF08447.2	PAS_3	7	9	6	8	8	9	7	7	8	6	10	12	11	6	9	8	10	10	3	5	5	7	6	5	5	8	0	7	6	8	1	2	1	2	0	0	2	2	3	0.000625763	2.64247e-05		Over-represented
PF00857.11	Isochorismatase	6	9	8	12	12	12	10	16	6	7	9	10	10	12	10	8	10	11	7	8	4	5	7	6	8	3	1	8	7	6	4	3	2	1	8	0	0	5	1	0.000524999	2.68098e-05		Over-represented
PF04857.11	CAF1	2	2	2	3	2	2	2	2	2	2	2	2	2	2	2	2	2	2	1	2	2	1	1	2	1	2	1	2	1	2	1	1	1	1	1	1	1	1	1	0.000650578	2.68098e-05		Over-represented
PF05794.4	Tcp11	2	1	2	2	2	2	1	2	1	2	1	2	2	1	1	1	2	2	1	1	1	1	1	1	1	1	1	1	1	1	0	0	0	0	0	0	0	0	0	0.000686355	2.68098e-05		Over-represented
PF08448.1	PAS_4	4	2	1	3	3	5	1	4	2	2	2	3	3	2	4	3	2	4	2	1	1	2	1	1	0	1	0	1	3	0	0	0	0	0	0	0	1	0	0	0.000509794	2.96791e-05		Over-represented
PF08755.2	YccV-like	0	1	1	1	1	1	1	1	1	1	1	1	1	1	1	1	1	1	1	0	0	0	0	0	0	0	0	0	0	0	1	0	0	0	0	1	0	1	1	0.000973713	4.27258e-05		Over-represented
PF04229.5	UPF0157	1	1	1	2	1	1	1	1	1	1	0	1	1	1	1	1	1	1	1	0	0	1	1	0	1	0	0	0	0	1	0	0	0	0	0	0	0	0	0	0.00096204	5.43579e-05		Over-represented
PF00854.12	PTR2	5	1	6	9	9	8	3	5	5	5	5	8	8	5	6	6	8	8	4	3	2	4	5	4	5	2	1	3	3	2	2	1	2	1	1	0	1	3	1	0.000650578	7.21803e-05		Over-represented
PF01243.11	Pyridox_oxidase	7	5	6	6	6	6	5	5	5	7	6	4	4	5	6	5	5	6	3	2	4	4	3	4	3	4	3	3	5	4	5	2	6	2	2	3	3	6	2	0.00140195	7.47513e-05		Over-represented
PF04791.7	LMBR1	2	1	2	2	2	2	2	2	2	2	2	2	2	1	2	2	2	2	1	1	1	2	1	1	2	2	0	1	2	1	0	0	0	0	0	0	0	0	0	0.000973713	8.36181e-05		Over-represented
PF04193.5	PQ-loop	7	7	8	9	9	9	7	6	10	7	8	8	7	7	8	7	10	6	5	6	5	6	6	4	8	7	5	6	5	4	5	7	6	6	4	3	6	6	7	0.000931291	0.000161393		Over-represented
PF02982.5	Scytalone_dh	1	1	2	2	2	3	1	1	1	1	2	2	2	1	2	2	3	1	1	2	1	1	1	1	0	1	0	1	0	1	0	0	0	0	0	0	0	0	0	0.00111973	0.000161393		Over-represented
PF01055.17	Glyco_hydro_31	8	6	12	9	9	9	8	10	8	10	7	8	8	10	9	7	8	10	10	5	6	8	8	6	9	5	1	6	4	6	3	3	3	3	6	7	2	4	3	0.00189042	0.000183039		Over-represented
PF05390.2	KRE9	1	1	2	1	1	1	2	1	1	2	2	1	1	1	2	2	1	1	0	1	0	0	0	0	0	0	2	1	0	0	0	0	1	1	0	0	0	1	1	0.00159862	0.000200884		Over-represented
PF02464.8	CinA	1	1	0	1	1	1	1	1	1	1	1	1	1	1	1	1	1	1	0	1	1	0	1	0	1	0	0	1	0	0	0	0	0	0	1	0	0	0	0	0.00209747	0.000203012		Over-represented
PF04241.6	DUF423	1	1	1	1	1	1	1	0	1	1	1	1	1	1	1	1	1	1	0	0	0	0	0	1	0	1	0	0	0	0	0	1	1	0	0	0	0	1	1	0.00209747	0.000203012		Over-represented
PF04117.3	Mpv17_PMP22	5	4	4	7	6	6	4	6	6	5	5	6	6	5	4	4	6	6	4	4	2	4	5	4	5	3	2	4	5	4	2	2	5	2	1	1	4	3	2	0.0019288	0.000205506		Over-represented
PF08982.2	DUF1857	1	1	1	1	1	1	1	1	1	1	1	1	1	1	1	1	1	1	0	0	1	1	1	1	0	0	0	0	0	0	0	0	1	0	1	1	0	0	0	0.00132727	0.000231721		Over-represented
PF01661.12	Macro	2	2	2	3	3	3	2	3	3	2	2	3	3	4	2	2	3	3	2	3	2	3	2	1	2	1	1	2	1	1	1	1	2	0	0	1	0	1	1	0.00208832	0.00025932		Over-represented
PF05383.8	La	2	3	3	3	3	3	3	2	2	3	3	3	2	3	3	3	3	3	2	2	2	2	1	2	2	2	3	2	1	2	2	2	2	1	2	3	0	1	2	0.00128701	0.000303187		Over-represented
PF03403.4	PAF-AH_p_II	4	4	6	4	4	4	4	7	3	5	2	5	5	5	4	3	5	4	2	3	3	4	5	2	5	2	0	3	3	3	0	1	1	0	2	0	1	0	2	0.00236548	0.000303187		Over-represented
PF03198.5	Glyco_hydro_72	5	4	8	7	6	7	5	5	6	7	4	7	5	5	5	5	6	6	5	5	5	3	3	5	3	5	5	6	5	4	2	1	2	1	1	1	0	1	1	0.00272767	0.000303187		Over-represented
PF03746.7	LamB_YcsF	1	1	1	1	1	1	1	1	0	1	0	1	1	1	1	1	1	1	1	0	0	0	1	0	1	0	0	0	0	0	0	1	0	0	1	0	0	0	0	0.00272767	0.000303187		Over-represented
PF05004.4	IFRD	1	1	1	1	1	1	1	1	0	1	1	1	1	1	1	1	1	0	1	1	1	0	0	0	0	1	0	1	0	0	0	0	0	0	0	0	0	0	0	0.00272767	0.000303187		Over-represented
PF03446.6	NAD_binding_2	9	10	11	10	10	9	10	12	9	14	9	9	7	11	9	5	9	10	8	5	5	5	14	4	14	6	2	5	4	6	3	6	2	2	4	3	2	5	3	0.00189042	0.00054362		Over-represented
PF02205.11	WH2	4	3	3	4	3	3	3	2	3	3	2	3	3	3	3	3	3	3	3	2	3	2	2	2	2	3	2	2	2	2	2	2	3	1	2	2	1	3	1	0.00248367	0.000584117		Over-represented
PF07915.4	PRKCSH	2	2	1	2	2	2	2	1	1	2	2	2	2	2	2	2	2	2	1	2	1	1	1	2	1	2	0	2	1	1	1	1	1	1	1	1	1	1	1	0.00326262	0.000723791		Over-represented
PF00254.19	FKBP_C	5	4	4	5	5	5	4	4	5	4	4	5	5	4	4	4	5	5	5	3	3	3	3	3	3	4	4	3	3	3	3	3	5	4	3	4	3	5	3	0.00373085	0.000723791		Over-represented
PF05190.9	MutS_IV	3	3	3	4	4	4	3	3	4	3	3	4	4	3	3	3	4	4	2	2	2	2	2	3	2	3	4	3	4	3	2	2	3	2	2	1	2	2	3	0.00353683	0.00073762		Over-represented
PF07971.3	Glyco_hydro_92	3	3	5	7	5	4	6	6	6	7	7	6	5	5	5	5	4	7	5	4	2	0	0	6	0	2	0	4	7	3	3	1	2	1	4	0	0	5	3	0.00428084	0.00073762		Over-represented
PF01088.12	Peptidase_C12	5	4	4	6	6	5	4	5	6	4	4	4	5	5	4	4	6	5	3	4	4	4	5	4	4	3	1	4	4	5	4	2	3	2	3	2	2	3	1	0.00308798	0.000748224		Over-represented
PF00708.9	Acylphosphatase	1	1	1	1	1	1	1	0	1	1	1	1	1	1	1	1	1	1	1	1	0	1	0	0	0	0	0	0	0	1	0	1	0	0	0	1	0	1	0	0.00419395	0.000748224		Over-represented
PF09159.1	Ydc2-catalyt	1	1	1	1	1	1	1	1	0	1	1	1	1	1	1	1	1	1	1	1	1	0	0	1	0	1	1	1	0	0	0	0	0	0	0	0	0	0	0	0.00419395	0.000748224		Over-represented
PF04253.6	TFR_dimer	3	1	3	4	4	4	3	3	3	3	1	3	3	4	2	2	3	2	2	2	2	2	3	3	3	2	2	1	1	1	0	0	0	0	1	0	0	1	0	0.00376894	0.000754853		Over-represented
PF01694.13	Rhomboid	4	4	5	5	5	5	5	4	4	2	3	5	5	4	4	4	5	4	3	3	2	3	3	4	3	4	2	4	3	1	3	3	4	2	0	4	1	3	3	0.00189042	0.000791956		Over-represented
PF00596.12	Aldolase_II	5	5	6	8	8	7	7	7	3	6	5	7	5	12	5	5	7	6	5	4	1	3	5	5	12	2	1	3	3	2	2	2	1	2	0	0	2	2	2	0.000699036	0.000828852		Over-represented
PF01329.10	Pterin_4a	1	1	1	1	1	1	1	1	1	1	1	1	1	1	1	2	1	1	0	1	1	1	1	1	0	0	1	1	1	1	0	0	0	0	0	0	0	0	0	0.00419395	0.000881277		Over-represented
PF02803.9	Thiolase_C	7	7	8	9	9	8	8	7	6	7	7	7	7	7	7	6	8	7	8	6	5	6	8	6	8	6	2	6	6	7	4	3	4	5	5	3	4	4	5	0.00421656	0.00115775		Over-represented
PF08457.1	Sfi1	1	1	1	1	1	1	1	1	0	1	0	1	1	1	1	1	1	1	1	0	1	0	0	0	0	1	1	1	0	0	0	1	0	0	0	0	0	0	0	0.0061372	0.00125162		Over-represented
PF03062.10	MBOAT	5	5	6	5	5	5	5	5	5	5	5	5	5	5	4	4	5	5	4	3	5	4	5	4	5	5	5	3	4	4	3	3	3	3	3	0	2	3	3	0.00185679	0.00125665		Over-represented
PF02544.7	Steroid_dh	3	3	3	3	3	3	3	3	3	3	4	3	3	3	3	3	3	3	2	2	3	3	2	3	3	3	2	1	3	3	2	2	2	2	2	1	1	3	2	0.00272767	0.00133379		Over-represented
PF00121.9	TIM	2	2	2	2	2	2	2	2	2	2	2	2	2	2	2	2	2	2	2	1	2	1	1	2	2	2	1	1	2	2	1	1	1	1	1	0	1	1	2	0.00272767	0.00135146		Over-represented
PF00578.12	AhpC-TSA	6	7	6	8	7	6	9	7	6	5	6	9	7	7	7	6	6	8	6	7	2	5	5	4	6	4	5	6	5	4	6	4	6	2	6	0	3	7	4	0.00293251	0.00135223		Over-represented
PF05195.7	AMP_N	2	2	3	3	3	3	2	3	3	3	3	3	3	3	3	3	3	2	2	2	3	2	2	2	4	2	2	2	3	2	1	1	1	1	1	0	1	1	1	0.00353683	0.00153232		Over-represented
PF02719.6	Polysacc_synt_2	4	2	3	4	4	4	3	5	3	3	6	3	4	3	4	4	4	4	2	2	2	4	5	3	3	3	2	2	3	4	1	1	0	2	0	1	1	0	1	0.00562048	0.00153232		Over-represented
PF00566.9	TBC	12	11	11	12	12	12	11	11	11	11	11	11	10	12	11	11	12	9	11	7	9	8	8	9	10	10	8	10	10	10	9	9	10	9	7	0	6	11	7	0.000505758	0.00184561		Over-represented
PF02714.6	DUF221	6	4	6	10	9	9	6	6	5	6	7	7	8	6	5	5	8	5	5	6	5	4	5	4	5	5	4	4	5	5	5	5	4	3	6	1	3	5	3	0.00236548	0.00206461		Over-represented
PF00179.17	UQ_con	21	20	27	21	21	21	25	24	21	25	23	24	21	23	23	22	24	21	20	18	17	18	19	17	19	20	14	23	20	19	22	19	22	19	20	5	17	21	16	0.000943235	0.00231962		Over-represented
PF04055.12	Radical_SAM	6	6	7	8	8	7	8	7	7	6	9	7	7	7	8	8	7	5	6	4	7	8	8	5	7	5	4	6	7	6	4	3	4	5	4	1	5	4	4	0.00768337	0.00231962		Over-represented
PF01323.11	DSBA	4	1	5	4	4	4	5	2	4	4	5	4	4	4	5	2	4	5	5	2	0	3	4	3	4	3	0	4	3	3	1	1	1	1	1	0	0	1	1	0.0061372	0.00252014		Over-represented
PF08028.2	Acyl-CoA_dh_2	8	10	12	9	10	11	14	11	9	12	9	9	10	9	9	7	11	10	11	7	6	8	13	6	12	7	0	6	6	9	5	5	5	6	5	5	6	6	8	0.00518123	0.00290624		Over-represented
PF03473.8	MOSC	2	4	5	4	4	4	4	5	4	4	4	5	6	6	5	4	4	6	4	3	3	5	6	3	6	2	0	4	3	3	1	0	1	0	1	0	0	1	1	0.00811295	0.0029195		Over-represented
PF03632.6	Glyco_hydro_65m	1	1	1	1	1	1	1	1	1	1	1	1	1	1	1	1	1	1	1	1	0	0	1	0	0	0	1	1	2	0	0	0	0	0	0	0	1	0	0	0.00395713	0.00339519		Over-represented
PF02566.10	OsmC	2	2	3	2	2	2	3	1	1	2	2	1	0	0	2	2	2	2	0	0	1	1	2	0	1	0	0	0	0	1	1	0	1	0	1	2	0	2	0	0.00789391	0.0035155		Over-represented
PF00789.11	UBX	6	5	4	7	6	6	5	6	5	5	4	6	5	5	4	4	6	6	5	4	3	4	3	5	4	3	7	4	4	3	4	2	6	3	4	1	3	4	2	0.00638996	0.0038049		Over-represented
PF02770.10	Acyl-CoA_dh_M	14	14	17	14	14	13	17	13	12	15	13	11	12	12	13	9	13	14	15	10	8	9	17	8	14	7	1	9	8	9	10	7	9	10	10	5	11	10	13	0.0077493	0.0038362		Over-represented
PF02197.8	RIIa	1	1	1	1	1	1	1	1	1	1	1	1	1	1	1	1	1	1	0	1	0	0	0	0	0	0	1	0	1	1	1	1	1	0	0	1	0	1	1	0.00870803	0.00408128		Over-represented
PF03190.6	DUF255	1	1	1	1	1	1	1	1	1	1	1	1	1	1	1	1	1	1	1	0	1	1	1	0	1	1	0	1	1	0	0	1	0	0	1	0	0	0	0	0.00870803	0.00408128		Over-represented
PF05029.4	TIMELESS_C	1	1	1	1	1	1	1	1	1	1	1	1	1	1	1	1	1	1	1	0	1	1	1	1	1	1	0	1	1	1	0	0	0	0	0	0	0	0	0	0.00870803	0.00408128		Over-represented
PF07823.2	CPDase	1	1	1	1	1	1	1	1	1	1	1	1	1	1	1	1	1	1	0	0	0	0	0	0	0	1	1	0	0	0	1	1	1	0	1	1	1	1	1	0.00870803	0.00408128		Over-represented
PF08534.1	Redoxin	7	8	7	6	6	6	9	6	7	5	7	8	6	7	8	7	6	8	6	7	3	5	5	4	6	4	5	6	5	3	6	4	7	4	8	0	3	7	5	0.00822843	0.00435996		Over-represented
PF04982.4	HPP	0	1	1	2	2	2	1	1	2	1	1	2	2	2	1	1	2	2	0	0	0	1	1	0	1	1	0	1	1	1	2	1	0	0	0	0	0	0	2	0.0106809	0.00435996		Over-represented
PF01734.13	Patatin	7	10	9	15	13	12	9	14	11	8	9	8	11	18	7	7	18	9	8	5	13	10	13	5	11	7	4	4	7	10	3	2	3	2	2	0	4	8	2	0.0128843	0.00435996		Over-represented
PF02184.7	HAT	3	1	2	3	3	3	1	3	3	2	3	3	3	2	2	2	3	3	3	3	1	2	1	2	1	1	1	3	1	1	2	1	1	1	2	0	1	2	1	0.0108751	0.0044191		Over-represented
PF08592.2	DUF1772	0	4	4	3	3	4	4	2	2	3	1	2	2	1	3	3	3	1	4	1	0	2	1	1	3	1	0	0	1	1	0	2	1	0	0	0	0	1	1	0.00870803	0.00466481		Over-represented
PF09423.1	PhoD	2	3	3	3	3	3	3	3	3	2	2	3	3	2	2	2	3	4	2	1	3	2	3	3	3	3	0	1	1	1	1	0	1	1	2	0	2	2	2	0.0136013	0.00499231		Over-represented
PF00611.14	FCH	5	5	5	5	5	5	5	4	5	4	5	5	5	5	5	5	5	3	3	3	3	4	4	2	3	4	4	3	3	4	4	2	6	5	2	0	5	5	2	0.00616916	0.0050634		Over-represented
PF03476.7	MOSC_N	1	3	3	3	3	2	3	2	3	4	5	3	3	1	4	3	2	2	3	3	2	1	3	2	1	1	0	3	2	1	1	0	1	0	1	0	0	1	3	0.013498	0.00537914		Over-represented
PF00941.12	FAD_binding_5	2	1	1	2	2	2	1	2	2	2	1	2	2	1	1	1	2	2	2	1	1	1	2	1	2	1	0	2	1	1	0	0	0	0	0	0	0	0	1	0.0136013	0.00537914		Over-represented
PF01315.13	Ald_Xan_dh_C	2	1	1	2	2	2	1	2	2	2	1	2	2	1	1	1	2	2	2	1	1	1	2	1	2	1	0	2	1	1	0	0	0	0	0	0	0	0	1	0.0136013	0.00537914		Over-represented
PF02738.9	Ald_Xan_dh_C2	2	1	1	2	2	2	1	2	2	2	1	2	2	1	1	1	2	2	2	1	1	1	2	1	2	1	0	2	1	1	0	0	0	0	0	0	0	0	1	0.0136013	0.00537914		Over-represented
PF03450.8	CO_deh_flav_C	2	1	1	2	2	2	1	2	2	2	1	2	2	1	1	1	2	2	2	1	1	1	2	1	2	1	0	2	1	1	0	0	0	0	0	0	0	0	1	0.0136013	0.00537914		Over-represented
PF01590.17	GAF	4	4	3	6	6	6	8	4	7	3	6	6	6	4	4	4	6	4	4	4	1	3	6	3	4	4	0	5	3	5	1	5	2	3	1	2	4	3	2	0.0136013	0.0061493		Over-represented
PF03657.4	UPF0113	0	1	1	1	1	1	1	1	1	1	0	1	1	0	1	1	1	1	0	0	0	0	0	0	0	0	1	0	0	0	1	0	1	1	1	1	0	0	0	0.0136013	0.00618555		Over-represented
PF04664.4	OGFr_N	0	1	1	1	1	1	1	0	1	1	1	1	1	1	1	1	0	1	0	1	0	0	0	0	0	0	0	1	0	0	1	1	1	0	0	0	0	1	0	0.0136013	0.00618555		Over-represented
PF00491.12	Arginase	4	5	4	5	5	6	4	5	4	4	4	5	5	6	4	4	4	5	4	4	1	4	7	4	5	4	1	4	3	3	2	3	2	1	3	0	1	4	2	0.0061372	0.00630264		Over-represented
PF03061.13	4HBT	5	5	9	8	8	8	9	7	6	12	10	7	7	6	6	5	5	5	9	2	2	5	4	6	5	5	0	6	6	7	6	1	7	4	2	1	2	6	4	0.0164249	0.006407		Over-represented
PF03572.9	Peptidase_S41	0	0	3	2	2	2	1	6	1	1	3	3	4	2	0	0	3	2	0	1	0	0	0	1	1	1	0	0	1	0	0	0	0	0	0	0	0	0	0	0.00326262	0.00669144		Over-represented
PF03595.8	C4dic_mal_tran	5	4	5	8	8	7	6	4	6	4	4	7	6	3	2	2	7	7	5	3	1	7	7	3	5	3	1	1	4	5	1	2	1	0	2	1	0	2	3	0.0136013	0.00669144		Over-represented
PF08704.1	GCD14	1	1	1	2	2	2	1	1	2	1	1	2	1	1	2	2	2	1	1	1	1	1	0	1	1	1	1	1	1	1	1	1	1	1	1	0	1	0	1	0.00959707	0.00676487		Over-represented
PF00501.19	AMP-binding	34	39	59	52	51	50	56	44	35	52	50	70	50	53	46	37	49	36	62	37	39	53	58	46	50	25	9	30	37	33	28	9	19	13	30	8	12	29	27	0.0195699	0.0070717		Over-represented
PF00441.15	Acyl-CoA_dh_1	13	12	17	14	15	15	16	15	12	14	13	11	12	13	11	8	14	13	15	11	8	11	19	8	14	8	0	9	8	10	9	7	8	10	9	5	10	9	10	0.00638996	0.00743345		Over-represented
PF00595.15	PDZ	1	1	1	1	1	1	2	1	2	2	1	1	1	1	1	1	1	1	2	0	0	1	1	0	1	0	2	1	1	1	0	0	0	0	0	0	0	0	0	0.0110921	0.00743345		Over-represented
PF02615.5	Ldh_2	1	1	1	1	1	1	1	1	1	1	1	1	1	2	1	1	1	1	2	0	1	1	1	1	1	1	0	0	1	1	0	0	0	0	0	0	0	0	0	0.0114648	0.00743345		Over-represented
PF00810.9	ER_lumen_recept	2	2	2	2	2	2	2	2	2	2	2	2	2	2	2	2	2	2	2	2	2	2	2	2	2	2	1	2	2	2	1	1	1	1	1	1	1	1	1	0.0136013	0.00743345		Over-represented
PF04516.6	CP2	1	1	1	1	1	1	1	1	1	1	1	1	1	1	1	1	1	1	1	1	1	1	1	1	1	1	0	1	1	1	0	0	0	0	0	0	0	0	0	0.0136013	0.00743345		Over-represented
PF04869.5	Uso1_p115_head	1	1	1	1	1	1	1	1	1	1	1	1	1	1	1	1	1	1	1	1	1	1	0	1	0	1	1	1	1	1	0	1	0	0	0	0	0	0	0	0.0136013	0.00743345		Over-represented
PF04892.3	VanZ	1	1	1	1	1	1	1	1	1	1	1	1	1	1	1	1	1	1	1	1	1	1	1	1	1	1	0	1	1	0	0	0	0	0	0	0	0	0	1	0.0136013	0.00743345		Over-represented
PF05508.2	Ran-binding	1	1	1	1	1	1	1	1	1	1	1	1	1	1	1	1	1	1	1	0	1	1	1	1	1	1	1	1	1	1	0	0	0	0	0	0	0	0	0	0.0136013	0.00743345		Over-represented
PF07106.4	TBPIP	1	1	1	1	1	1	1	1	1	1	1	1	1	1	1	1	1	1	1	1	0	0	0	0	0	0	1	1	0	0	1	1	1	1	1	0	1	1	0	0.0136013	0.00743345		Over-represented
PF08045.2	CDC14	1	1	1	1	1	1	1	1	1	1	1	1	1	1	1	1	1	1	1	1	1	1	1	1	1	1	0	1	1	1	0	0	0	0	0	0	0	0	0	0.0136013	0.00743345		Over-represented
PF08174.2	DUF1709	1	1	1	1	1	1	1	1	1	1	1	1	1	1	1	1	1	1	1	1	1	1	0	1	1	1	1	1	1	1	0	0	0	0	0	0	0	0	0	0.0136013	0.00743345		Over-represented
PF08427.1	DUF1741	1	1	1	1	1	1	1	1	1	1	1	1	1	1	1	1	1	1	1	1	1	1	1	1	1	1	0	1	1	1	0	0	0	0	0	0	0	0	0	0.0136013	0.00743345		Over-represented
PF09427.1	DUF2014	1	1	1	1	1	1	1	1	1	1	1	1	1	1	1	1	1	1	1	1	1	1	1	1	1	1	0	1	1	1	0	0	0	0	0	0	0	0	0	0.0136013	0.00743345		Over-represented
PF00041.12	fn3	2	2	3	4	4	3	3	2	1	3	4	2	2	3	4	2	2	3	3	2	2	2	2	2	3	3	1	2	1	3	1	1	1	0	1	0	1	1	1	0.0145368	0.00743345		Over-represented
PF08669.2	GCV_T_C	3	2	1	3	3	3	3	1	3	3	3	3	3	2	3	3	3	3	3	1	1	2	2	3	2	2	1	2	2	2	2	1	3	1	2	0	1	2	2	0.00959707	0.00779816		Over-represented
PF01287.11	eIF-5a	1	2	3	2	2	2	2	1	2	2	2	2	2	1	2	2	2	1	2	1	0	1	1	1	1	2	2	1	2	1	1	1	1	1	1	2	1	1	1	0.0136013	0.00779816		Over-represented
PF03022.7	MRJP	2	0	0	0	0	1	1	0	1	0	1	1	1	0	1	1	1	1	0	0	0	0	0	0	0	1	0	0	0	0	0	0	0	0	0	0	0	0	0	0.00598934	0.00789987		Over-represented
PF02133.6	Transp_cyt_pur	5	7	9	10	10	11	11	13	4	13	8	11	10	9	10	9	9	11	11	7	2	7	9	7	11	3	10	8	4	5	3	7	8	3	6	6	0	8	3	0.0136013	0.00789987		Over-represented
PF00174.10	Oxidored_molyb	3	4	6	4	4	4	7	3	3	3	5	3	3	4	5	4	3	5	3	2	2	3	5	3	5	3	0	2	4	4	2	0	3	1	4	1	0	1	2	0.017957	0.00793376		Over-represented
PF03306.4	AAL_decarboxy	0	2	2	1	1	1	2	0	1	2	1	1	1	0	1	1	1	1	0	0	1	1	1	1	1	1	0	0	1	0	0	0	0	0	0	0	0	0	0	0.0136013	0.0081146		Over-represented
PF00533.17	BRCT	10	8	9	11	11	11	8	11	8	8	10	11	11	10	8	8	11	11	8	7	8	9	9	9	10	7	10	8	11	8	9	4	8	6	6	6	4	9	4	0.0214689	0.00835136		Over-represented
PF06966.3	DUF1295	5	3	5	4	4	4	4	5	5	4	4	5	5	5	3	3	5	5	2	4	2	2	2	5	5	4	0	3	1	4	3	1	2	2	0	0	3	7	3	0.0116145	0.00853527		Over-represented
PF01799.11	Fer2_2	2	1	1	2	2	2	1	2	2	2	1	2	2	1	1	1	2	1	2	2	1	1	1	1	2	1	0	2	1	1	0	0	0	0	0	0	0	0	1	0.0221163	0.00875209		Over-represented
PF06824.2	DUF1237	2	2	3	3	3	3	2	3	3	3	3	3	3	3	4	4	3	4	1	4	3	3	4	4	2	3	0	3	2	1	1	0	0	0	1	0	0	1	1	0.0333653	0.00875209		Over-represented
PF05141.3	DIT1_PvcA	2	1	2	5	5	5	1	0	2	2	1	1	1	3	2	2	4	2	2	1	1	3	2	1	1	0	1	0	1	1	0	0	0	0	0	0	0	0	0	0.00638996	0.00889204		Over-represented
PF08219.2	TOM13	1	1	1	2	1	1	1	1	1	1	1	1	1	1	1	1	1	1	1	1	1	1	1	1	1	1	1	1	1	1	0	0	0	0	0	0	0	0	0	0.0191726	0.00889204		Over-represented
PF07061.2	Swi5	1	0	1	1	1	1	1	1	1	0	1	1	1	1	1	1	1	1	0	1	1	0	0	0	0	1	1	1	0	0	0	1	0	0	0	0	0	1	1	0.0198403	0.0090015		Over-represented
PF06127.2	DUF962	2	1	1	2	2	2	1	1	1	1	1	2	2	1	1	1	2	2	1	1	1	1	1	1	1	1	1	1	1	1	1	1	1	1	1	0	0	1	1	0.0114072	0.00934624		Over-represented
PF01532.11	Glyco_hydro_47	9	9	8	11	11	10	8	12	8	11	8	11	12	11	9	9	10	9	7	8	10	10	9	9	10	8	3	8	8	7	8	3	6	12	5	7	9	6	3	0.0195973	0.0115339		Over-represented
PF01159.10	Ribosomal_L6e	2	1	1	2	2	2	1	2	1	1	1	2	2	2	1	1	2	2	1	1	1	1	1	1	1	1	2	1	1	1	1	1	1	1	1	1	1	1	1	0.0114648	0.0118772		Over-represented
PF06165.2	Glyco_transf_36	1	0	0	1	1	1	0	1	1	0	0	1	1	1	0	0	1	1	0	0	1	0	0	0	0	1	0	0	0	0	0	0	0	0	0	0	0	0	0	0.0136013	0.0118772		Over-represented
PF08605.1	Rad9_Rad53_bind	1	0	0	1	1	1	0	1	1	0	0	1	1	1	0	0	1	1	1	0	0	0	0	0	0	0	1	0	0	0	0	0	0	0	0	0	0	0	0	0.0136013	0.0118772		Over-represented
PF00614.13	PLDc	5	4	5	5	4	4	5	5	5	5	4	4	5	4	5	4	5	7	6	4	3	4	4	4	5	4	2	3	5	5	3	3	4	3	3	1	4	3	2	0.0158564	0.0118772		Over-represented
PF00494.10	SQS_PSY	2	2	1	2	2	2	3	2	2	2	2	2	2	2	2	2	2	2	1	2	1	2	2	1	2	2	1	2	1	2	1	1	1	2	1	0	2	1	2	0.0198403	0.0120007		Over-represented
PF01987.8	DUF124	2	2	2	2	2	2	2	1	2	3	2	2	2	2	2	2	2	2	2	1	1	3	3	2	2	2	0	1	2	2	0	0	0	0	1	0	0	0	0	0.025469	0.0120007		Over-represented
PF02141.12	DENN	2	2	1	2	2	2	1	2	2	2	2	2	2	2	2	2	2	2	2	2	2	2	2	2	2	2	0	2	2	1	0	0	0	0	0	0	0	0	0	0.0311066	0.0120087		Over-represented
PF02627.11	CMD	3	3	4	2	3	4	4	5	4	6	4	3	3	4	3	1	4	4	3	2	1	3	7	2	6	1	1	1	1	1	1	0	1	1	1	0	0	2	3	0.00624889	0.0120253		Over-represented
PF01509.9	TruB_N	2	2	2	3	3	3	2	2	3	2	2	3	3	2	2	2	3	3	2	2	1	2	2	2	2	2	2	2	2	2	2	2	2	2	2	0	2	2	2	0.0114072	0.0120253		Over-represented
PF04112.4	Mak10	1	1	1	1	1	1	1	1	1	1	1	1	1	1	1	1	1	0	1	0	0	1	1	1	1	1	1	0	1	1	0	0	0	0	0	0	0	0	1	0.023163	0.0120253		Over-represented
PF08639.1	SLD3	1	1	1	1	1	1	1	1	1	0	1	1	1	1	1	1	1	1	1	1	1	1	0	0	1	1	1	1	1	1	0	0	0	0	0	0	0	0	0	0.023163	0.0120253		Over-represented
PF09692.1	Arb1	1	1	1	1	1	1	1	1	1	1	0	1	1	1	1	1	1	1	0	1	1	1	1	1	1	1	0	1	1	1	0	0	0	0	0	0	0	0	0	0.023163	0.0120253		Over-represented
PF06687.3	SUR7	1	0	1	1	0	1	1	1	1	1	0	1	1	1	1	1	1	1	1	0	0	0	0	0	0	0	3	0	0	0	0	0	0	0	0	0	0	0	0	0.00128701	0.012242		Over-represented
PF00328.13	Acid_phosphat_A	9	10	10	12	12	12	10	11	10	10	10	12	11	9	9	9	12	12	9	10	5	11	14	12	11	6	6	10	7	8	5	5	8	4	10	5	5	9	9	0.0267017	0.0127169		Over-represented
PF08624.1	CRC_subunit	2	2	2	2	2	2	2	3	2	2	2	2	2	2	2	2	2	2	2	2	2	2	2	2	2	2	2	2	2	2	1	1	1	1	1	1	0	1	1	0.0195973	0.0131442		Over-represented
PF02190.7	LON	2	2	2	2	2	2	3	3	2	3	2	2	2	2	2	2	2	3	2	1	1	2	2	2	2	1	1	1	2	2	1	1	2	2	1	0	3	2	2	0.0219022	0.0131442		Over-represented
PF02862.8	DDHD	2	2	2	2	2	2	2	2	1	2	2	2	2	2	2	2	2	2	2	2	2	2	1	2	2	2	1	2	1	2	0	1	0	1	0	0	0	0	2	0.0221163	0.0131442		Over-represented
PF01876.7	RNase_P_p30	1	1	1	1	1	1	1	1	1	1	1	1	1	1	1	1	1	1	1	1	0	1	1	1	1	1	1	0	1	0	0	1	0	0	0	1	0	0	1	0.023163	0.0131442		Over-represented
PF02502.9	LacAB_rpiB	1	1	1	1	1	1	1	1	1	1	1	1	1	1	1	1	1	1	1	0	1	1	1	1	1	1	0	0	1	1	0	1	0	0	0	0	0	1	1	0.023163	0.0131442		Over-represented
PF03980.5	Nnf1	1	1	1	1	1	1	1	1	1	1	1	1	1	1	1	1	1	1	1	0	1	1	1	1	1	1	1	1	1	1	0	0	0	0	0	0	0	0	1	0.023163	0.0131442		Over-represented
PF05967.2	DUF887	2	1	1	2	2	2	1	2	2	1	1	2	2	1	2	2	2	2	1	2	1	1	0	1	1	1	2	2	1	1	1	0	1	2	1	0	1	1	1	0.023163	0.0131442		Over-represented
PF06428.2	Sec2p	1	1	1	1	1	1	1	1	1	1	1	1	1	1	1	1	1	1	1	1	1	1	1	1	1	1	1	1	1	1	0	0	0	0	0	0	0	0	0	0.023163	0.0131442		Over-represented
PF06437.2	ISN1	1	1	1	1	1	1	1	1	1	1	1	1	1	1	1	1	1	1	1	1	1	1	1	1	1	1	1	1	1	1	0	0	0	0	0	0	0	0	0	0.023163	0.0131442		Over-represented
PF08214.2	RTT109	1	1	1	1	1	1	1	1	1	1	1	1	1	1	1	1	1	1	1	1	0	1	0	1	1	1	1	0	1	1	1	0	1	0	1	0	0	0	0	0.023163	0.0131442		Over-represented
PF08367.2	M16C_assoc	1	1	1	1	1	1	1	1	1	1	1	1	1	1	1	1	1	1	1	1	1	1	1	1	1	1	1	1	1	1	0	0	0	0	0	0	0	0	0	0.023163	0.0131442		Over-represented
PF08438.1	MMR_HSR1_C	1	1	1	1	1	1	1	1	1	1	1	1	1	1	1	1	1	1	1	1	1	1	1	1	1	1	1	1	1	1	0	0	0	0	0	0	0	0	0	0.023163	0.0131442		Over-represented
PF08511.2	COQ9	1	1	1	1	1	1	1	1	1	1	1	1	1	1	1	1	1	1	1	1	1	1	0	1	1	1	1	1	1	1	1	0	0	0	0	0	0	0	0	0.023163	0.0131442		Over-represented
PF08601.1	PAP1	1	1	1	1	1	1	1	1	1	1	1	1	1	1	1	1	1	1	1	1	1	1	1	1	1	1	1	1	1	1	0	0	0	0	0	0	0	0	0	0.023163	0.0131442		Over-represented
PF08619.1	Nha1_C	1	1	1	1	1	1	1	1	1	1	1	1	1	1	1	1	1	1	1	1	1	1	1	1	1	1	1	1	1	1	0	0	0	0	0	0	0	0	0	0.023163	0.0131442		Over-represented
PF08626.2	Trs120	1	1	1	1	1	1	1	1	1	1	1	1	1	1	1	1	1	1	1	1	1	1	1	1	1	1	1	0	1	1	0	0	0	0	0	0	0	1	0	0.023163	0.0131442		Over-represented
PF09302.2	XLF	1	1	1	1	1	1	1	1	1	1	1	1	1	1	1	1	1	1	1	1	1	1	1	1	1	1	1	1	1	1	0	0	0	0	0	0	0	0	0	0.023163	0.0131442		Over-represented
PF08574.1	DUF1762	1	1	1	1	1	1	1	1	1	0	0	1	1	0	1	1	1	1	0	0	0	0	0	0	0	0	1	0	0	0	1	1	1	0	0	2	0	0	0	0.0136013	0.0133258		Over-represented
PF01571.12	GCV_T	3	2	2	3	3	3	3	2	3	3	3	3	3	2	3	3	3	3	3	2	2	3	3	3	3	2	1	2	2	2	2	2	3	1	1	0	2	2	2	0.0221269	0.0146403		Over-represented
PF08628.3	Nexin_C	2	2	2	2	2	2	2	2	2	2	1	2	2	2	2	2	2	2	2	1	2	2	2	2	2	2	1	2	2	1	1	1	1	1	2	0	1	1	1	0.023163	0.0155627		Over-represented
PF01841.10	Transglut_core	1	1	1	1	1	1	1	1	1	2	2	1	1	1	1	1	1	1	0	1	2	1	1	1	1	1	1	1	1	1	0	0	0	0	0	0	0	0	0	0.023163	0.0156056		Over-represented
PF05175.5	MTS	1	2	2	3	2	2	1	1	3	1	0	2	1	0	2	1	2	2	0	0	0	1	1	2	0	0	0	0	0	0	0	1	0	0	4	1	0	1	0	0.00875492	0.0159092		Over-represented
PF01702.9	TGT	1	2	2	3	2	2	2	2	2	2	2	2	2	2	2	2	2	2	2	2	2	2	2	2	2	2	0	2	2	2	1	0	1	0	1	0	0	1	0	0.0276754	0.0159092		Over-represented
PF01156.10	IU_nuc_hydro	3	3	2	5	4	4	4	4	2	2	3	3	2	3	3	3	3	1	1	3	2	2	2	3	3	3	1	3	3	3	2	1	2	0	0	1	0	2	2	0.0286585	0.0159092		Over-represented
PF00465.10	Fe-ADH	3	5	3	6	6	4	3	5	3	3	4	4	4	5	2	1	4	4	3	2	1	3	5	1	7	1	1	2	2	2	2	1	2	1	3	1	1	4	2	0.0135938	0.0159149		Over-represented
PF08426.1	ICE2	1	1	2	1	1	1	1	1	1	1	1	1	1	1	1	1	1	1	1	0	1	1	1	1	1	1	1	1	1	1	0	0	0	1	0	0	1	0	0	0.0292888	0.015963		Over-represented
PF09359.1	VTC	2	2	2	2	2	3	2	3	2	2	2	2	2	2	2	2	3	2	2	2	2	2	2	2	2	2	3	2	2	2	1	1	1	1	1	1	1	1	1	0.0272575	0.0176532		Over-represented
PF00294.15	PfkB	5	4	5	5	5	5	4	3	5	6	5	5	5	6	6	6	5	6	6	3	4	6	5	3	4	3	2	4	4	5	3	5	4	3	2	0	4	6	2	0.0290348	0.0178416		Over-represented
PF04321.8	RmlD_sub_bind	7	6	3	12	11	7	5	11	7	10	6	8	6	8	5	4	9	8	5	6	4	6	7	9	6	6	2	5	5	6	5	4	5	4	5	4	2	6	1	0.023163	0.0180475		Over-represented
PF06792.2	UPF0261	1	1	1	1	1	1	1	1	1	1	1	0	0	1	0	0	1	1	1	1	0	0	0	0	0	1	0	1	1	0	0	0	0	0	0	0	0	0	1	0.0289212	0.018196		Over-represented
PF09370.1	TIM-br_sig_trns	1	1	1	1	1	1	1	1	1	1	1	0	0	1	0	0	1	1	1	1	0	0	0	0	0	1	0	1	1	0	0	0	0	0	0	0	0	0	1	0.0289212	0.018196		Over-represented
PF01545.12	Cation_efflux	9	7	7	9	9	9	7	9	8	7	7	9	9	9	7	7	9	9	7	7	7	8	6	9	9	9	5	7	6	8	6	6	9	6	4	1	5	6	5	0.0223324	0.0182453		Over-represented
PF01791.10	DeoC	0	1	1	1	1	1	1	1	1	1	1	1	1	1	1	0	1	1	1	1	0	0	0	0	1	1	0	0	0	0	1	0	1	1	0	0	0	1	1	0.0335107	0.0200709		Over-represented
PF05786.5	Barren	1	0	1	1	1	1	1	1	1	1	1	1	0	1	1	1	1	1	1	0	1	1	1	0	1	0	0	0	1	1	1	0	1	0	0	0	0	0	0	0.0335107	0.0200709		Over-represented
PF01170.9	UPF0020	2	2	2	2	2	2	2	2	1	2	1	1	1	2	1	1	2	2	1	1	1	1	1	1	1	1	2	1	1	1	1	2	1	2	1	0	1	1	2	0.0290348	0.0215315		Over-represented
PF01756.10	ACOX	3	2	2	3	3	3	2	2	1	2	2	2	2	1	2	1	3	1	2	1	0	1	1	0	1	0	1	1	0	0	1	1	1	2	1	0	2	1	5	0.00739911	0.0218393		Over-represented
PF05670.4	DUF814	2	1	2	2	2	2	2	1	2	2	2	2	2	2	2	2	2	2	2	1	1	2	2	2	2	2	2	1	2	2	1	1	1	1	1	0	0	1	1	0.0316305	0.0224657		Over-represented
PF00628.20	PHD	15	17	20	15	15	17	23	16	17	16	11	15	14	15	17	16	14	15	17	13	13	13	13	15	14	16	13	15	13	12	16	13	16	11	11	8	8	16	14	0.0252734	0.0235166		Over-represented
PF03835.6	Rad4	2	2	2	2	2	2	2	2	2	2	2	2	2	2	2	2	2	2	2	2	2	2	2	2	2	2	2	2	2	2	1	1	1	1	1	0	1	1	0	0.0240024	0.0244153		Over-represented
PF01488.11	Shikimate_DH	5	3	6	8	7	7	5	4	3	5	4	6	5	4	3	2	7	5	4	2	3	8	7	4	7	4	1	4	3	3	1	1	1	1	1	0	3	1	1	0.0252734	0.0244153		Over-represented
PF07855.3	DUF1649	1	1	1	1	1	1	1	1	1	1	1	1	1	1	1	1	1	1	1	1	1	1	1	1	1	1	0	1	1	1	0	0	1	0	0	0	0	1	0	0.037027	0.0244153		Over-represented
PF07955.2	DUF1687	1	1	1	1	1	1	1	1	1	1	1	1	1	1	1	1	1	1	1	1	1	1	1	1	1	1	1	1	1	1	0	0	1	0	0	0	0	0	0	0.037027	0.0244153		Over-represented
PF07956.2	DUF1690	1	1	1	1	1	1	1	1	1	1	1	1	1	1	1	1	1	1	1	1	1	1	0	1	1	1	1	1	1	1	0	1	0	0	0	0	0	0	1	0.037027	0.0244153		Over-represented
PF08287.2	DASH_Spc19	1	1	1	1	1	1	1	1	1	1	1	1	1	1	1	1	1	1	1	1	1	1	1	1	1	1	1	1	1	1	1	0	0	0	0	0	0	0	0	0.037027	0.0244153		Over-represented
PF08507.1	COPI_assoc	1	1	1	1	1	1	1	1	1	1	1	1	1	1	1	1	1	1	1	1	1	1	1	1	1	1	1	1	1	1	0	1	0	0	0	0	0	0	0	0.037027	0.0244153		Over-represented
PF08508.1	DUF1746	1	1	1	1	1	1	1	1	1	1	1	1	1	1	1	1	1	1	1	0	1	1	1	1	1	1	0	1	1	1	1	0	1	0	0	0	0	0	1	0.037027	0.0244153		Over-represented
PF08587.2	UBA_2	1	1	1	1	1	1	1	1	1	1	1	1	1	1	1	1	1	1	1	1	1	1	1	1	1	1	1	1	1	1	0	0	0	0	0	1	0	0	0	0.037027	0.0244153		Over-represented
PF08589.1	DUF1770	1	1	1	1	1	1	1	1	1	1	1	1	1	1	1	1	1	1	1	1	1	1	1	1	1	1	0	1	1	1	0	1	0	0	0	0	0	0	1	0.037027	0.0244153		Over-represented
PF08608.3	Wyosine_form	1	1	1	1	1	1	1	1	1	1	1	1	1	1	1	1	1	1	1	1	1	1	1	1	1	0	1	1	1	1	0	0	0	1	0	0	1	0	0	0.037027	0.0244153		Over-represented
PF02602.6	HEM4	1	1	1	1	1	1	1	1	1	1	1	1	1	1	1	0	1	1	1	1	1	0	0	0	1	0	1	0	0	1	1	1	1	0	1	0	0	1	0	0.0380877	0.0244153		Over-represented
PF05839.2	Apc13p	1	1	0	1	1	1	1	1	1	1	1	1	1	1	1	1	1	1	0	1	1	1	1	1	1	1	1	1	1	1	0	0	0	0	0	0	0	0	0	0.0380877	0.0244153		Over-represented
PF07950.2	DUF1691	1	1	1	1	1	1	1	1	1	1	0	1	1	1	1	1	1	1	0	1	1	1	1	1	1	1	1	1	1	1	0	0	0	0	0	0	0	0	0	0.0380877	0.0244153		Over-represented
PF08584.2	Ribonuc_P_40	1	0	1	1	1	1	1	1	1	1	1	1	1	1	1	1	1	1	1	1	1	1	0	1	0	1	0	0	1	1	1	0	1	1	0	0	0	0	0	0.0380877	0.0244153		Over-represented
PF09405.1	Btz	1	1	1	1	1	1	1	1	1	1	0	1	1	1	1	1	1	1	1	1	1	1	1	1	1	1	0	1	1	1	0	0	0	0	0	0	0	0	0	0.0380877	0.0244153		Over-represented
PF09441.1	Abp2	1	1	1	1	1	1	1	1	1	1	1	1	1	1	0	1	1	1	1	1	1	1	1	1	1	1	0	1	1	1	0	0	0	0	0	0	0	0	0	0.0380877	0.0244153		Over-represented
PF01253.13	SUI1	4	3	3	4	3	4	3	4	4	3	3	4	4	4	3	3	4	4	2	2	2	3	3	2	3	2	3	3	2	3	3	3	3	3	3	6	3	3	1	0.00638996	0.0244615		Over-represented
PF00654.11	Voltage_CLC	3	4	3	3	3	3	4	4	4	3	4	4	4	3	4	4	3	4	3	3	3	4	4	3	3	3	1	3	3	3	3	2	3	3	2	0	4	3	2	0.025469	0.0244615		Over-represented
PF01144.14	CoA_trans	4	1	1	3	3	3	3	2	3	1	3	3	3	3	2	2	3	3	3	1	2	2	4	1	3	2	0	2	2	3	1	1	1	1	1	0	1	1	1	0.0339983	0.0259351		Over-represented
PF02785.10	Biotin_carb_C	5	5	5	6	6	5	5	5	4	5	4	5	5	5	5	5	5	5	6	3	2	4	5	4	7	3	5	4	3	4	4	4	3	4	5	0	3	3	5	0.0145037	0.0259374		Over-represented
PF05249.2	UPF0187	1	2	2	3	3	3	2	3	2	2	1	1	1	2	2	2	1	1	2	1	1	2	4	1	2	1	0	1	1	1	1	0	1	0	0	0	0	1	1	0.0191726	0.0265415		Over-represented
PF08212.3	Lipocalin_2	1	0	1	1	1	1	0	0	1	1	0	0	0	0	1	1	1	1	0	0	1	0	0	1	0	0	0	0	0	1	0	0	0	0	0	0	0	0	0	0.0304543	0.0265415		Over-represented
PF03366.7	YEATS	2	2	2	2	2	2	2	2	2	2	2	3	2	2	2	2	2	2	2	2	2	2	2	2	2	2	3	2	1	1	1	1	1	1	1	0	2	1	1	0.0300373	0.0265688		Over-represented
PF05192.9	MutS_III	5	6	6	6	6	6	6	6	6	6	6	6	6	5	6	6	6	6	4	5	6	5	4	5	6	6	6	4	5	5	6	6	6	4	6	4	5	6	6	0.0444782	0.0286419		Over-represented
PF06395.2	CDC24	1	1	1	1	1	1	1	2	1	1	1	1	1	1	1	1	1	1	1	1	1	1	1	1	1	0	1	1	1	1	0	0	1	0	0	1	0	0	1	0.0444782	0.0289614		Over-represented
PF08642.1	Rxt3	1	1	1	1	1	1	1	1	1	1	1	2	1	1	1	1	1	1	1	1	1	1	1	1	1	1	1	1	1	1	0	1	0	0	0	0	0	0	1	0.0444782	0.0289614		Over-represented
PF03171.11	2OG-FeII_Oxy	7	16	18	21	20	16	16	21	10	22	15	16	19	24	13	14	15	18	18	14	9	13	16	18	20	7	1	16	11	13	9	7	15	6	16	11	5	18	6	0.0475612	0.0289794		Over-represented
PF01177.13	Asp_Glu_race	0	2	2	3	3	2	3	2	1	4	1	1	1	0	1	1	3	3	1	0	0	1	4	0	2	1	0	0	2	0	0	1	0	0	1	0	0	1	1	0.0241553	0.0304716		Over-represented
PF02558.7	ApbA	7	6	8	5	5	5	7	5	6	11	5	6	5	8	5	5	7	4	5	4	4	5	7	3	11	5	2	5	2	4	3	3	3	2	2	2	6	6	3	0.0145368	0.0305126		Over-represented
PF01189.8	Nol1_Nop2_Fmu	2	4	4	3	3	3	4	3	3	4	3	3	3	3	4	3	3	3	2	1	2	3	3	3	3	2	3	3	3	2	3	3	3	3	3	0	2	3	3	0.0314935	0.0317437		Over-represented
PF02838.6	Glyco_hydro_20b	2	1	1	3	2	1	1	3	2	1	1	2	2	2	1	1	1	2	1	1	1	1	1	1	2	1	0	0	2	1	1	0	0	0	0	3	0	1	1	0.0314636	0.0325445		Over-represented
PF03803.6	Scramblase	1	1	1	2	1	1	1	1	1	1	0	1	1	1	0	1	1	1	1	0	0	0	0	0	0	0	1	0	0	0	1	1	1	1	1	1	1	0	1	0.0456263	0.0331657		Over-represented
PF02910.11	Succ_DH_flav_C	2	2	2	2	2	2	2	2	1	2	2	2	1	2	2	2	2	2	1	1	1	1	1	1	1	1	2	1	1	1	1	1	5	1	1	0	1	1	1	0.000625763	0.0349472		Over-represented
PF00443.20	UCH	13	15	17	14	14	15	14	15	15	16	13	14	15	16	16	17	14	14	13	10	14	14	14	13	14	14	16	11	14	14	13	14	14	16	13	8	13	15	12	0.037027	0.0349472		Over-represented
PF02733.8	Dak1	2	3	3	2	2	2	3	3	2	2	3	2	2	4	3	3	2	2	1	1	2	2	4	2	3	2	2	1	3	3	1	2	1	1	1	0	0	2	1	0.0385272	0.0355227		Over-represented
PF01067.13	Calpain_III	1	1	1	2	1	1	1	1	0	1	1	1	1	1	1	1	1	1	1	1	0	1	1	0	1	1	0	1	1	1	0	0	0	1	0	1	0	1	0	0.0499393	0.0355227		Over-represented
PF03907.4	Spo7	1	1	1	2	1	1	1	1	0	1	1	1	1	1	1	1	1	1	1	1	1	1	1	1	1	1	1	1	1	1	0	0	0	0	0	0	0	0	0	0.0499393	0.0355227		Over-represented
PF08760.2	DUF1793	2	2	5	2	2	2	4	3	1	7	3	2	2	3	3	3	2	1	3	3	2	0	0	2	0	2	0	2	1	0	0	0	0	2	1	0	3	5	1	0.0327823	0.0359179		Over-represented
PF08546.2	ApbA_C	6	6	8	5	5	5	8	5	6	11	4	5	5	6	5	5	6	6	5	4	4	5	8	4	11	4	2	5	3	4	2	3	2	3	2	1	5	5	2	0.00638996	0.0359837		Over-represented
PF05147.4	LANC_like	1	1	1	1	1	1	1	1	1	1	1	1	1	1	1	1	1	1	1	0	0	1	1	0	1	1	0	0	1	1	1	0	1	0	1	2	0	0	0	0.037027	0.0364271		Over-represented
PF03388.4	Lectin_leg-like	2	2	2	2	2	2	2	2	2	2	2	2	2	2	2	2	2	2	2	1	2	2	2	2	2	2	2	2	2	2	1	1	1	2	1	0	2	1	1	0.0374992	0.0364271		Over-represented
PF04511.6	DER1	2	2	2	2	2	2	2	2	2	2	2	2	2	2	2	2	2	2	1	0	1	2	2	1	1	2	2	1	2	2	2	2	2	2	2	1	2	2	1	0.0374992	0.0364271		Over-represented
PF00152.11	tRNA-synt_2	8	7	7	7	7	7	7	10	7	7	7	7	7	7	7	7	7	8	7	7	6	7	8	7	7	7	6	7	8	7	5	6	5	4	6	1	4	6	6	0.025469	0.0367934		Over-represented
PF01039.13	Carboxyl_trans	2	3	3	3	3	3	3	3	3	3	3	3	3	3	3	3	3	3	4	3	2	2	2	2	4	2	2	2	2	2	3	2	2	2	2	0	2	2	4	0.0136013	0.0368554		Over-represented
PF04209.4	HgmA	2	3	3	4	4	3	2	5	3	3	1	3	3	3	2	1	4	3	4	1	1	3	4	1	6	1	0	1	1	4	1	0	0	1	2	0	0	0	1	0.0331874	0.0381886		Over-represented
PF00089.17	Trypsin	5	1	2	2	4	3	2	1	3	2	2	2	2	1	1	1	3	4	2	1	1	3	2	4	3	1	1	2	1	2	0	0	0	0	0	0	0	0	0	0.0378254	0.0385715		Over-represented
PF06609.4	TRI12	1	0	1	3	3	3	1	9	0	3	0	2	2	5	0	0	2	4	0	0	0	2	2	0	0	0	0	0	0	3	0	0	0	0	0	0	0	0	0	0.00928649	0.0391554		Over-represented
PF01116.11	F_bP_aldolase	3	3	3	3	3	3	2	3	2	3	2	3	3	5	2	2	3	3	3	2	2	2	3	3	5	3	1	2	2	2	1	2	2	1	1	0	1	2	1	0.0228243	0.0395228		Over-represented
PF08547.3	CIA30	2	2	2	2	2	2	2	2	2	2	2	2	2	2	2	2	2	2	2	1	1	3	2	2	2	1	0	2	2	2	1	1	1	2	0	0	2	1	2	0.0374992	0.0398583		Over-represented
PF01388.12	ARID	3	3	3	4	3	3	3	3	3	3	3	3	3	3	3	3	3	3	2	4	2	2	3	3	2	3	2	4	3	4	2	1	2	2	1	0	2	3	2	0.0333653	0.0411406		Over-represented
PF03810.10	IBN_N	6	9	9	7	7	7	9	8	6	9	9	8	7	8	9	9	7	9	7	6	4	8	7	6	8	8	8	7	9	7	6	3	8	7	6	0	6	6	7	0.0380738	0.0411406		Over-represented
PF03200.7	Glyco_hydro_63	2	1	1	2	2	2	1	2	1	1	1	2	2	1	1	1	2	2	1	1	1	1	1	2	1	2	1	1	1	1	1	0	1	1	1	1	1	1	1	0.0415399	0.0411406		Over-represented
PF02127.6	Peptidase_M18	3	2	2	2	2	2	2	2	2	2	2	2	2	2	2	2	2	2	2	3	2	2	2	2	2	2	2	2	2	2	1	1	1	1	1	0	1	1	1	0.046387	0.0437777		Over-represented
PF03828.10	PAP_assoc	3	3	3	3	3	3	3	3	3	3	2	3	3	2	3	3	3	3	2	1	3	3	3	3	3	3	2	3	3	3	2	2	2	2	2	1	0	3	2	0.0499196	0.0460346		Over-represented
PF08243.2	SPT2	0	0	0	0	0	0	0	0	0	0	0	0	0	0	0	0	0	0	0	0	1	1	1	1	1	1	1	0	1	1	1	1	1	0	1	0	2	1	1	0.000505758	5.67376e-05	Absent	Under-represented
PF09434.1	EME1	0	0	0	0	0	0	0	0	0	0	0	0	0	0	0	0	0	0	1	1	1	1	1	1	1	1	1	1	1	1	0	1	0	0	0	0	0	1	1	0.000650578	7.21803e-05	Absent	Under-represented
PF00631.13	G-gamma	0	0	0	0	0	0	0	0	0	0	0	0	0	0	0	0	0	0	0	1	1	1	1	1	0	1	1	1	1	0	1	1	0	1	0	1	1	0	0	0.00132727	0.000231721	Absent	Under-represented
PF01381.13	HTH_3	0	0	0	0	0	0	0	1	0	0	0	0	0	0	0	0	0	0	1	1	1	1	1	0	1	1	1	1	1	1	2	0	1	1	1	0	1	1	0	0.000524999	2.64247e-05		Under-represented
PF00638.9	Ran_BP1	2	2	2	2	2	2	2	2	2	2	1	2	2	2	2	2	2	2	3	3	3	3	2	3	2	3	3	3	3	2	3	3	3	3	3	1	3	3	3	0.000509794	7.47513e-05		Under-represented
PF02732.6	ERCC4	1	1	1	1	1	1	1	1	1	1	1	1	1	1	1	1	1	1	2	2	2	2	2	2	2	2	2	2	2	2	1	2	1	3	1	1	4	2	2	0.000249356	0.000183039		Under-represented
PF00788.14	RA	2	2	2	2	2	2	2	2	2	2	2	2	2	2	2	2	2	1	2	3	3	3	2	3	3	3	2	3	3	2	3	2	3	3	3	2	2	2	3	0.00236548	0.000303187		Under-represented
PF00298.10	Ribosomal_L11	1	1	1	2	2	2	1	1	1	2	1	2	1	1	1	1	1	1	2	2	2	2	2	2	2	2	3	2	2	2	2	2	2	2	2	3	1	2	1	0.00299845	0.000791956		Under-represented
PF01833.15	TIG	0	1	1	0	0	0	0	1	0	0	0	0	0	1	1	1	0	0	1	1	1	1	1	1	1	1	2	1	1	1	1	1	1	1	0	1	1	1	1	0.00263143	0.00112882		Under-represented
PF09288.1	UBA_3	0	0	0	0	0	0	0	1	0	0	0	0	0	0	0	0	0	0	0	0	0	1	1	1	0	1	1	1	0	0	1	1	1	1	1	0	0	1	1	0.00811295	0.00240951		Under-represented
PF02020.9	W2	2	1	1	2	2	2	1	1	1	1	1	1	1	1	1	1	2	2	2	2	1	2	2	2	2	2	2	2	2	1	2	2	2	2	2	3	3	2	2	0.00632297	0.00289911		Under-represented
PF03439.4	Supt5	0	0	1	0	0	0	1	0	0	1	0	0	0	0	1	1	0	0	1	1	1	1	1	1	1	1	1	1	1	1	0	1	0	1	1	0	1	1	1	0.00794546	0.00408128		Under-represented
PF03169.6	OPT	2	4	8	4	4	3	6	9	3	9	8	3	2	7	11	10	4	4	6	11	9	11	11	12	20	11	3	9	12	8	10	5	10	22	17	4	20	15	7	0.00880242	0.00618025		Under-represented
PF03313.6	SDH_alpha	0	0	0	0	0	0	0	0	0	0	1	0	0	0	0	0	0	0	0	0	0	1	1	0	1	0	0	0	1	1	1	0	1	1	1	0	1	1	1	0.0136013	0.00618025		Under-represented
PF00616.10	RasGAP	2	3	3	3	3	3	3	3	3	3	3	3	3	3	3	3	3	3	3	4	4	4	4	4	4	4	4	4	4	3	4	3	4	3	4	1	5	4	4	0.00105972	0.00618555		Under-represented
PF00439.16	Bromodomain	6	6	8	6	6	6	7	7	7	7	6	8	7	7	6	6	7	7	5	7	8	7	9	8	8	7	10	7	7	7	9	10	10	9	10	6	8	11	10	0.0134541	0.00669144		Under-represented
PF00467.20	KOW	1	1	1	0	0	0	2	1	1	1	3	1	1	2	2	1	1	1	3	3	1	2	2	4	2	1	3	3	2	1	2	3	3	1	1	3	1	3	2	0.0136013	0.00669144		Under-represented
PF03659.5	Glyco_hydro_71	0	1	2	0	0	0	1	1	1	2	1	0	0	1	2	2	0	0	5	8	1	0	1	1	1	5	0	5	4	2	4	4	4	3	3	3	3	9	0	0.0136013	0.00727406		Under-represented
PF00622.19	SPRY	2	2	2	2	2	2	3	4	2	2	2	2	3	2	2	2	2	4	2	4	3	5	4	3	3	3	3	3	3	3	4	3	4	2	4	3	3	4	2	0.00959707	0.00779816		Under-represented
PF02270.6	TFIIF_beta	0	1	0	0	0	0	0	1	1	0	0	0	0	1	0	0	0	0	1	1	0	1	1	0	1	1	1	1	1	0	1	0	1	1	1	0	1	1	1	0.0145368	0.00779816		Under-represented
PF02037.18	SAP	2	2	1	2	2	2	2	4	2	1	1	1	1	5	2	1	2	2	5	5	4	3	4	4	6	6	5	4	2	3	2	3	5	3	1	0	2	4	4	0.0136013	0.00871664		Under-represented
PF01078.12	Mg_chelatase	1	0	1	1	1	1	1	1	1	1	1	1	1	1	1	1	1	1	2	1	0	2	2	3	2	0	2	1	1	2	2	2	1	2	2	2	2	3	1	0.00959707	0.00999045		Under-represented
PF04299.3	FMN_bind_2	0	0	0	1	1	0	0	0	0	0	0	0	0	1	0	0	0	0	1	1	1	2	2	1	2	0	1	1	1	2	0	1	0	0	1	0	0	0	1	0.0201732	0.0113112		Under-represented
PF00650.11	CRAL_TRIO	5	4	4	4	4	5	4	5	5	4	4	4	4	5	5	4	5	5	8	4	6	7	6	5	6	5	6	5	5	5	8	4	6	9	7	2	8	5	8	0.00926066	0.0115339		Under-represented
PF03315.6	SDH_beta	0	0	0	0	0	0	0	0	0	0	1	0	0	0	0	0	0	0	0	0	0	1	1	0	1	0	0	0	1	1	1	0	1	1	0	0	1	1	1	0.023163	0.0120253		Under-represented
PF06110.2	DUF953	0	0	1	0	0	0	0	0	0	0	1	0	0	0	0	1	0	1	1	0	0	2	1	1	1	0	0	1	1	0	1	1	1	1	1	0	1	2	1	0.0248019	0.0150827		Under-represented
PF08739.1	PalI	0	2	2	1	1	1	2	1	1	2	2	1	1	1	2	2	1	1	1	2	2	2	2	2	1	2	3	2	2	1	4	4	6	1	2	3	3	6	3	0.0163007	0.0159092		Under-represented
PF00887.10	ACBP	1	2	2	2	2	1	2	1	1	2	1	2	1	2	2	2	2	2	2	2	2	2	2	2	2	2	1	2	2	2	3	3	3	3	3	2	2	3	2	0.0277993	0.0168203		Under-represented
PF00575.14	S1	2	4	4	3	2	3	3	3	3	4	4	3	3	3	4	4	2	3	4	5	2	5	4	4	3	5	4	4	5	4	6	3	4	4	3	3	5	4	4	0.0304543	0.0216908		Under-represented
PF02463.10	SMC_N	6	4	8	5	5	5	5	7	7	7	7	7	7	7	5	5	6	7	8	8	10	8	8	7	7	8	7	8	6	7	8	7	9	8	7	3	7	7	8	0.0123035	0.0228412		Under-represented
PF00719.10	Pyrophosphatase	1	1	1	1	1	1	1	1	1	1	1	1	1	1	1	1	1	1	2	1	1	2	2	1	2	2	2	1	2	2	1	1	1	1	1	1	1	1	1	0.037027	0.0244153		Under-represented
PF00338.13	Ribosomal_S10	1	1	1	1	1	1	1	1	1	1	1	1	1	1	1	1	1	2	2	1	2	1	1	1	2	1	2	1	1	2	2	2	2	1	2	1	1	2	1	0.0380877	0.0244153		Under-represented
PF00849.13	PseudoU_synth_2	1	1	1	1	1	1	1	1	1	1	1	1	1	1	1	1	1	1	1	1	1	1	1	1	1	2	4	1	1	1	2	1	2	2	2	3	2	3	1	0.0241553	0.0367401		Under-represented
PF00221.10	PAL	1	1	0	0	0	0	0	1	0	0	0	1	0	2	0	0	0	2	2	1	1	1	2	1	1	1	0	0	0	2	2	0	2	2	1	0	2	2	2	0.0475612	0.0385715		Under-represented
PF01937.10	DUF89	1	1	1	1	1	1	1	1	1	1	1	1	1	1	1	1	1	1	1	1	2	1	2	1	1	1	1	1	1	1	3	2	2	2	2	0	2	2	2	0.037027	0.0409042		Under-represented
PF01851.13	PC_rep	2	2	2	2	2	2	2	2	2	2	2	2	2	2	2	2	2	2	3	2	3	2	2	3	3	3	2	2	3	3	3	3	3	2	3	0	2	3	3	0.00768337	0.0411406		Under-represented
PF00163.10	Ribosomal_S4	2	1	1	2	2	2	1	2	2	1	1	2	2	2	1	1	2	2	1	2	2	2	2	2	2	2	3	2	2	2	2	2	3	2	2	2	2	2	2	0.0461351	0.0441117		Under-represented

## Sheet: Dothid_pathogens_versus_all_pat
Domain	Description	Altbr1 (in)	Clafu1 (in)	CocheC5_3 (in)	CocheC4_1 (in)	Cocsa1 (in)	Dotse1 (in)	Lepmu1 (in)	Mycfi2 (in)	Mycgr3 (in)	Pyrtt1 (in)	Pyrtr1 (in)	Sepmu1 (in)	Seppo1 (in)	Settu1 (in)	Stano2 (in)	Botci1 (out)	Fusgr1 (out)	Fusox1 (out)	Maggr1 (out)	Necha2 (out)	Sclsc1 (out)	Verda1 (out)	Mellp1 (out)	Pucgr1 (out)	Ustma1 (out)	P-value (Wilcox, two-sided and adjusted with BH)	P-value (T-test, two-sided and adjusted with BH)	Unique/absent in ingroup	Over/under-represented in ingroup
PF02493.11	MORN	1	1	1	1	1	1	1	1	0	1	1	1	1	1	1	0	0	0	0	0	0	0	0	0	0	0.00381351	1.61655e-06	Unique	Over-represented
PF04952.5	AstE_AspA	1	1	1	1	1	0	1	1	1	1	1	1	1	1	1	0	0	0	0	0	0	0	0	0	0	0.00381351	1.61655e-06	Unique	Over-represented
PF06687.3	SUR7	1	1	1	0	1	1	1	1	0	1	1	1	1	1	1	0	0	0	0	0	0	0	0	0	0	0.00636344	6.10454e-05	Unique	Over-represented
PF08574.1	DUF1762	1	1	1	1	1	1	1	0	0	1	1	1	1	1	1	0	0	0	0	0	0	0	0	0	0	0.00636344	6.10454e-05	Unique	Over-represented
PF03022.7	MRJP	2	0	0	0	1	1	1	0	1	1	1	1	1	1	1	0	0	0	0	0	0	0	0	0	0	0.0247394	0.00763336	Unique	Over-represented
PF01863.8	DUF45	1	0	1	1	1	0	1	0	0	1	1	0	1	1	1	0	0	0	0	0	0	0	0	0	0	0.0318644	0.00857368	Unique	Over-represented
PF05933.4	Fun_ATP-synt_8	1	0	1	1	1	0	1	0	0	1	1	0	0	1	1	0	0	0	0	0	0	0	0	0	0	0.0587499	0.0192181	Unique	Over-represented
PF06165.2	Glyco_transf_36	1	0	1	1	1	0	1	0	0	1	1	0	0	1	1	0	0	0	0	0	0	0	0	0	0	0.0587499	0.0192181	Unique	Over-represented
PF08605.1	Rad9_Rad53_bind	1	0	1	1	1	0	1	0	0	1	1	0	0	1	1	0	0	0	0	0	0	0	0	0	0	0.0587499	0.0192181	Unique	Over-represented
PF02157.6	Man-6-P_recep	1	1	1	1	1	0	0	0	0	1	1	0	0	1	0	0	0	0	0	0	0	0	0	0	0	0.0998353	0.0376159	Unique	Over-represented
PF00254.19	FKBP_C	5	4	5	5	5	4	5	4	4	5	5	4	4	5	5	3	3	3	3	3	3	3	4	3	3	0.00636344	3.78543e-06		Over-represented
PF04119.3	HSP9_HSP12	2	2	2	2	2	2	1	2	1	2	2	1	1	2	2	0	0	0	0	0	1	0	0	0	1	0.00636344	1.91174e-05		Over-represented
PF02910.11	Succ_DH_flav_C	2	2	2	2	2	2	1	2	2	2	1	2	2	2	2	1	1	1	1	1	1	1	1	1	1	0.00636344	6.10454e-05		Over-represented
PF01243.11	Pyridox_oxidase	7	6	6	6	6	5	5	7	6	4	4	6	5	5	6	2	4	3	4	3	3	4	2	3	2	0.00636344	8.45298e-05		Over-represented
PF03928.5	DUF336	3	2	3	3	3	3	3	3	3	2	2	3	2	3	3	1	1	1	1	2	0	1	0	0	1	0.00636344	0.000136931		Over-represented
PF05637.3	Glyco_transf_34	4	6	5	5	7	5	6	4	5	6	6	5	3	4	5	2	2	3	2	2	2	3	0	0	0	0.00636344	0.0001499		Over-represented
PF02205.11	WH2	4	3	4	3	3	3	3	3	2	3	3	3	3	3	3	2	2	2	2	2	2	2	1	1	1	0.00636344	0.000251737		Over-represented
PF01287.11	eIF-5a	1	3	2	2	2	2	2	2	2	2	2	2	2	2	1	1	1	1	1	1	1	1	1	1	1	0.00636344	0.000339443		Over-represented
PF08755.2	YccV-like	0	1	1	1	1	1	1	1	1	1	1	1	1	1	1	0	0	0	0	0	0	0	0	0	1	0.00636344	0.000530814		Over-represented
PF00989.15	PAS	4	2	6	6	4	2	5	3	4	5	7	3	3	7	5	2	1	3	1	2	2	1	1	1	1	0.0122656	0.000990339		Over-represented
PF08448.1	PAS_4	4	1	3	3	5	1	2	2	2	3	3	4	3	2	4	1	2	1	1	0	1	0	0	1	0	0.0138574	0.00121759		Over-represented
PF00875.9	DNA_photolyase	3	3	3	3	3	3	3	3	3	3	3	3	3	3	3	1	2	1	2	2	1	2	1	2	2	0.00203468	0.001717		Over-represented
PF03657.4	UPF0113	0	1	1	1	1	1	1	1	0	1	1	1	1	1	1	0	0	0	0	0	0	0	1	0	0	0.0138574	0.001717		Over-represented
PF08457.1	Sfi1	1	1	1	1	1	1	0	1	0	1	1	1	1	1	1	0	0	0	0	0	1	0	0	0	0	0.0138574	0.001717		Over-represented
PF00588.10	SpoU_methylase	2	2	2	2	2	2	2	2	2	2	2	2	2	2	2	1	1	1	1	1	1	1	0	0	0	0.00203468	0.00172207		Over-represented
PF00854.12	PTR2	5	6	9	9	8	3	5	5	5	8	8	6	6	8	8	3	4	5	4	5	3	2	1	1	1	0.0138574	0.0029136		Over-represented
PF05190.9	MutS_IV	3	3	4	4	4	3	4	3	3	4	4	3	3	4	4	2	2	2	3	2	3	3	2	2	3	0.0160448	0.00372328		Over-represented
PF00179.17	UQ_con	21	27	21	21	21	25	21	25	23	24	21	23	22	24	21	18	18	19	17	19	23	19	19	17	16	0.0138574	0.00385815		Over-represented
PF02714.6	DUF221	6	6	10	9	9	6	5	6	7	7	8	5	5	8	5	6	4	5	4	5	4	5	3	3	3	0.0207322	0.00758843		Over-represented
PF06825.3	HSBP1	0	1	1	1	1	1	1	0	0	1	1	1	1	1	1	0	0	0	0	0	1	0	0	0	0	0.0280643	0.00805175		Over-represented
PF00253.12	Ribosomal_S14	3	3	3	3	3	2	3	3	3	3	2	2	2	3	2	2	2	2	2	2	2	2	2	2	1	0.0297487	0.00805175		Over-represented
PF03441.5	FAD_binding_7	2	4	4	4	4	4	4	4	4	4	4	4	4	4	4	2	2	2	3	3	2	3	2	2	4	0.0118346	0.00811678		Over-represented
PF00789.11	UBX	6	4	7	6	6	5	5	5	4	6	5	4	4	6	6	4	4	3	5	4	4	3	3	3	2	0.0250127	0.00811678		Over-represented
PF05794.4	Tcp11	2	2	2	2	2	1	1	2	1	2	2	1	1	2	2	1	1	1	1	1	1	1	0	0	0	0.0236714	0.00813917		Over-represented
PF00566.9	TBC	12	11	12	12	12	11	11	11	11	11	10	11	11	12	9	7	8	8	9	10	10	10	9	6	7	0.00948328	0.00857368		Over-represented
PF05390.2	KRE9	1	2	1	1	1	2	1	2	2	1	1	2	2	1	1	1	0	0	0	0	1	0	1	0	1	0.0259937	0.00906602		Over-represented
PF03486.5	HI0933_like	1	1	1	1	1	0	1	1	1	2	1	0	0	1	1	0	0	0	0	0	0	1	0	0	0	0.0300876	0.00906602		Over-represented
PF00867.9	XPG_I	5	6	5	5	5	6	6	5	5	6	6	5	5	6	6	5	4	3	4	4	5	4	3	4	5	0.0138574	0.00963499		Over-represented
PF02566.10	OsmC	2	3	2	2	2	3	1	2	2	1	0	2	2	2	2	0	1	2	0	1	0	1	0	0	0	0.0280643	0.0102614		Over-represented
PF04241.6	DUF423	1	1	1	1	1	1	1	1	1	1	1	1	1	1	1	0	0	0	1	0	0	0	0	0	1	0.00636344	0.0117772		Over-represented
PF07823.2	CPDase	1	1	1	1	1	1	1	1	1	1	1	1	1	1	1	0	0	0	0	0	0	0	0	1	1	0.00636344	0.0117772		Over-represented
PF05383.8	La	2	3	3	3	3	3	2	3	3	3	2	3	3	3	3	2	2	1	2	2	2	2	1	0	2	0.00961383	0.0157143		Over-represented
PF04564.6	U-box	2	3	3	3	3	3	3	3	2	4	3	3	3	2	3	2	2	2	2	2	3	2	1	2	2	0.0280643	0.0164668		Over-represented
PF08447.2	PAS_3	7	6	8	8	9	7	8	6	10	12	11	9	8	10	10	5	7	6	5	5	7	8	2	2	3	0.0259937	0.0180597		Over-represented
PF08669.2	GCV_T_C	3	1	3	3	3	3	3	3	3	3	3	3	3	3	3	1	2	2	3	2	2	2	1	1	2	0.0138574	0.0189412		Over-represented
PF04193.5	PQ-loop	7	8	9	9	9	7	10	7	8	8	7	8	7	10	6	6	6	6	4	8	6	4	6	6	7	0.0276841	0.0189412		Over-represented
PF03070.7	TENA_THI-4	2	1	2	2	2	2	2	1	1	3	3	1	1	1	2	0	1	1	1	1	0	1	1	1	1	0.0415141	0.0192181		Over-represented
PF05175.5	MTS	1	2	3	2	2	1	3	1	0	2	1	2	1	2	2	0	1	1	2	0	0	0	0	0	0	0.0377195	0.0195184		Over-represented
PF00072.15	Response_reg	20	21	27	25	25	25	22	18	24	26	24	22	21	25	22	18	18	22	13	15	22	16	10	7	11	0.0232233	0.0233005		Over-represented
PF07971.3	Glyco_hydro_92	3	5	7	5	4	6	6	7	7	6	5	5	5	4	7	4	0	0	6	0	4	3	1	0	3	0.0280643	0.0267684		Over-represented
PF03746.7	LamB_YcsF	1	1	1	1	1	1	0	1	0	1	1	1	1	1	1	0	0	1	0	1	0	0	0	0	0	0.0318644	0.0267684		Over-represented
PF04664.4	OGFr_N	0	1	1	1	1	1	1	1	1	1	1	1	1	0	1	1	0	0	0	0	1	0	0	0	0	0.0318644	0.0267684		Over-represented
PF05004.4	IFRD	1	1	1	1	1	1	0	1	1	1	1	1	1	1	0	1	0	0	0	0	1	0	0	0	0	0.0318644	0.0267684		Over-represented
PF08534.1	Redoxin	7	7	6	6	6	9	7	5	7	8	6	8	7	6	8	7	5	5	4	6	6	3	4	3	5	0.0318644	0.0268882		Over-represented
PF02982.5	Scytalone_dh	1	2	2	2	3	1	1	1	2	2	2	2	2	3	1	2	1	1	1	0	1	1	0	0	0	0.0416383	0.0279651		Over-represented
PF01694.13	Rhomboid	4	5	5	5	5	5	4	2	3	5	5	4	4	5	4	3	3	3	4	3	4	1	2	1	3	0.0297487	0.0325199		Over-represented
PF04791.7	LMBR1	2	2	2	2	2	2	2	2	2	2	2	2	2	2	2	1	2	1	1	2	1	1	0	0	0	0.00701828	0.0364865		Over-represented
PF00780.13	CNH	2	3	3	3	3	3	3	2	3	2	2	3	3	3	3	1	2	1	3	2	2	2	2	1	2	0.0318644	0.0364865		Over-represented
PF00512.16	HisKA	15	16	22	20	22	22	19	14	20	23	22	18	16	21	16	17	15	19	10	11	15	13	6	4	5	0.0280643	0.0370888		Over-represented
PF00708.9	Acylphosphatase	1	1	1	1	1	1	1	1	1	1	1	1	1	1	1	1	1	0	0	0	0	1	0	0	0	0.0138574	0.0376159		Over-represented
PF02197.8	RIIa	1	1	1	1	1	1	1	1	1	1	1	1	1	1	1	1	0	0	0	0	0	1	0	0	1	0.0138574	0.0376159		Over-represented
PF04715.4	Anth_synt_I_N	2	2	2	2	2	2	2	2	2	2	2	2	2	2	2	2	1	1	2	1	2	1	1	1	1	0.0138574	0.0376159		Over-represented
PF08982.2	DUF1857	1	1	1	1	1	1	1	1	1	1	1	1	1	1	1	0	1	1	1	0	0	0	0	0	0	0.0138574	0.0376159		Over-represented
PF03198.5	Glyco_hydro_72	5	8	7	6	7	5	6	7	4	7	5	5	5	6	6	5	3	3	5	3	6	4	1	0	1	0.0280643	0.0376159		Over-represented
PF00578.12	AhpC-TSA	6	6	8	7	6	9	6	5	6	9	7	7	6	6	8	7	5	5	4	6	6	4	2	3	4	0.0405173	0.0376159		Over-represented
PF05192.9	MutS_III	5	6	6	6	6	6	6	6	6	6	6	6	6	6	6	5	5	4	5	6	4	5	4	5	6	0.0143193	0.0412644		Over-represented
PF03062.10	MBOAT	5	6	5	5	5	5	5	5	5	5	5	4	4	5	5	3	4	5	4	5	3	4	3	2	3	0.0273667	0.0435219		Over-represented
PF00857.11	Isochorismatase	6	8	12	12	12	10	6	7	9	10	10	10	8	10	11	8	5	7	6	8	8	6	1	0	1	0.0318644	0.0435219		Over-represented
PF02518.17	HATPase_c	26	27	30	28	28	30	27	23	28	31	30	27	26	29	25	21	22	30	18	19	25	21	13	11	10	0.0280643	0.0443069		Over-represented
PF01381.13	HTH_3	0	0	0	0	0	0	0	0	0	0	0	0	0	0	0	1	1	1	0	1	1	1	1	1	0	0.00636344	0.0117772	Absent	Under-represented
PF09434.1	EME1	0	0	0	0	0	0	0	0	0	0	0	0	0	0	0	1	1	1	1	1	1	1	0	0	1	0.00636344	0.0117772	Absent	Under-represented
PF00631.13	G-gamma	0	0	0	0	0	0	0	0	0	0	0	0	0	0	0	1	1	1	1	0	1	0	1	1	0	0.0138574	0.0376159	Absent	Under-represented
PF07543.3	PGA2	0	0	0	0	0	0	0	0	0	0	0	0	0	0	0	1	1	1	1	1	1	1	0	0	0	0.0138574	0.0376159	Absent	Under-represented
PF09161.1	DUF1941	0	0	0	0	0	0	0	0	0	0	0	0	0	0	0	1	1	1	1	1	1	1	0	0	0	0.0138574	0.0376159	Absent	Under-represented
PF08243.2	SPT2	0	0	0	0	0	0	0	0	0	0	0	0	0	0	0	0	1	1	1	1	0	1	0	2	1	0.0138574	0.0674541	Absent	Under-represented
PF09279.2	efhand_like	0	0	0	0	0	0	0	0	0	0	0	0	0	0	0	0	1	1	1	1	0	0	1	1	0	0.0280643	0.0936059	Absent	Under-represented
PF09288.1	UBA_3	0	0	0	0	0	0	0	0	0	0	0	0	0	0	0	0	1	1	1	0	1	0	1	0	1	0.0280643	0.0936059	Absent	Under-represented
PF02816.9	Alpha_kinase	0	0	0	0	0	0	0	0	0	0	0	0	0	0	0	2	0	2	2	2	1	0	30	51	0	0.0143193	0.543084	Absent	Under-represented
PF01833.15	TIG	0	1	0	0	0	0	0	0	0	0	0	1	1	0	0	1	1	1	1	1	1	1	1	1	1	0.0126467	0.000539716		Under-represented
PF02037.18	SAP	2	1	2	2	2	2	2	1	1	1	1	2	1	2	2	5	3	4	4	6	4	3	3	2	4	0.00636344	0.00857368		Under-represented
PF03439.4	Supt5	0	1	0	0	0	1	0	1	0	0	0	1	1	0	0	1	1	1	1	1	1	1	1	1	1	0.0318644	0.00857368		Under-represented
PF02463.10	SMC_N	6	8	5	5	5	5	7	7	7	7	7	5	5	6	7	8	8	8	7	7	8	7	8	7	8	0.0318644	0.00984426		Under-represented
PF02732.6	ERCC4	1	1	1	1	1	1	1	1	1	1	1	1	1	1	1	2	2	2	2	2	2	2	3	4	2	0.00203468	0.0115963		Under-represented
PF02270.6	TFIIF_beta	0	0	0	0	0	0	1	0	0	0	0	0	0	0	0	1	1	1	0	1	1	0	1	1	1	0.0143193	0.0142215		Under-represented
PF00616.10	RasGAP	2	3	3	3	3	3	3	3	3	3	3	3	3	3	3	4	4	4	4	4	4	3	3	5	4	0.00821806	0.0172824		Under-represented
PF00638.9	Ran_BP1	2	2	2	2	2	2	2	2	1	2	2	2	2	2	2	3	3	2	3	2	3	2	3	3	3	0.0143193	0.0232485		Under-represented
PF00788.14	RA	2	2	2	2	2	2	2	2	2	2	2	2	2	2	1	3	3	2	3	3	3	2	3	2	3	0.0143193	0.0232485		Under-represented
PF00221.10	PAL	1	0	0	0	0	0	0	0	0	1	0	0	0	0	2	1	1	2	1	1	0	2	2	2	2	0.0280643	0.0233005		Under-represented
PF03169.6	OPT	2	8	4	4	3	6	3	9	8	3	2	11	10	4	4	11	11	11	12	20	9	8	22	20	7	0.0259937	0.0397291		Under-represented
PF04299.3	FMN_bind_2	0	0	1	1	0	0	0	0	0	0	0	0	0	0	0	1	2	2	1	2	1	2	0	0	1	0.0280643	0.0485961		Under-represented

## Sheet: Capnodiales_versus_Pleosporales
Domain	Description	Altbr1 (in)	CocheC5_3 (in)	CocheC4_1 (in)	Cocsa1 (in)	Lepmu1 (in)	Pyrtt1 (in)	Pyrtr1 (in)	Settu1 (in)	Stano2 (in)	Mycfi2 (out)	Mycgr3 (out)	Clafu1 (out)	Sepmu1 (out)	Seppo1 (out)	Dotse1 (out)	Bauco1 (out)	P-value (Wilcox, two-sided and adjusted with BH)	P-value (T-test, two-sided and adjusted with BH)	Unique/absent in ingroup	Over/under-represented in ingroup
PF01126.11	Heme_oxygenase	1	1	1	1	1	1	1	1	0	0	0	0	0	0	0	0	0.0237132	0.00219026	Unique	Over-represented
PF05032.3	Spo12	1	1	1	1	1	1	1	1	0	0	0	0	0	0	0	0	0.0237132	0.00219026	Unique	Over-represented
PF06325.4	PrmA	1	1	1	1	1	0	1	1	1	0	0	0	0	0	0	0	0.0237132	0.00219026	Unique	Over-represented
PF06859.3	Bin3	1	1	1	1	1	1	1	1	0	0	0	0	0	0	0	0	0.0237132	0.00219026	Unique	Over-represented
PF07156.5	Prenylcys_lyase	1	1	1	1	1	1	1	1	0	0	0	0	0	0	0	0	0.0237132	0.00219026	Unique	Over-represented
PF08672.2	APC2	1	1	1	1	1	1	0	1	1	0	0	0	0	0	0	0	0.0237132	0.00219026	Unique	Over-represented
PF09496.1	Cenp-O	1	1	1	1	0	1	1	1	1	0	0	0	0	0	0	0	0.0237132	0.00219026	Unique	Over-represented
PF05433.6	Rick_17kDa_Anti	1	1	2	2	0	1	1	1	2	0	0	0	0	0	0	0	0.0298308	0.0152879	Unique	Over-represented
PF02594.7	DUF167	1	1	1	1	1	0	0	1	1	0	0	0	0	0	0	0	0.0450359	0.0162279	Unique	Over-represented
PF02755.6	RPEL	0	1	1	1	1	1	1	1	0	0	0	0	0	0	0	0	0.0450359	0.0162279	Unique	Over-represented
PF03059.7	NAS	1	1	1	1	1	0	0	1	1	0	0	0	0	0	0	0	0.0450359	0.0162279	Unique	Over-represented
PF03576.5	Peptidase_S58	1	1	1	1	0	1	1	0	1	0	0	0	0	0	0	0	0.0450359	0.0162279	Unique	Over-represented
PF03893.7	Lipase3_N	0	1	1	1	0	1	1	1	1	0	0	0	0	0	0	0	0.0450359	0.0162279	Unique	Over-represented
PF07778.2	Mis6	0	1	1	1	1	1	1	1	0	0	0	0	0	0	0	0	0.0450359	0.0162279	Unique	Over-represented
PF07792.3	DUF1630	0	1	1	1	1	1	1	1	0	0	0	0	0	0	0	0	0.0450359	0.0162279	Unique	Over-represented
PF08101.2	DUF1708	1	1	1	1	0	1	1	1	0	0	0	0	0	0	0	0	0.0450359	0.0162279	Unique	Over-represented
PF08611.1	DUF1774	0	1	1	1	1	1	1	1	0	0	0	0	0	0	0	0	0.0450359	0.0162279	Unique	Over-represented
PF02156.6	Glyco_hydro_26	1	1	1	1	1	0	0	1	0	0	0	0	0	0	0	0	0.0905128	0.0483422	Unique	Over-represented
PF02791.8	DDT	0	1	1	1	0	1	1	1	0	0	0	0	0	0	0	0	0.0905128	0.0483422	Unique	Over-represented
PF03235.5	DUF262	0	1	1	0	1	1	1	1	0	0	0	0	0	0	0	0	0.0905128	0.0483422	Unique	Over-represented
PF06041.2	DUF924	1	1	1	1	0	0	0	1	1	0	0	0	0	0	0	0	0.0905128	0.0483422	Unique	Over-represented
PF03068.6	PAD	0	1	1	1	0	1	0	0	1	0	0	0	0	0	0	0	0.168431	0.117343	Unique	Over-represented
PF06888.3	Put_Phosphatase	0	1	1	1	0	0	1	0	1	0	0	0	0	0	0	0	0.168431	0.117343	Unique	Over-represented
PF06280.3	DUF1034	0	2	2	0	0	1	1	2	0	0	0	0	0	0	0	0	0.181987	0.160545	Unique	Over-represented
PF06314.2	ADC	0	1	2	1	1	0	0	1	0	0	0	0	0	0	0	0	0.176855	0.167545	Unique	Over-represented
PF09056.2	Phospholip_A2_3	2	0	0	0	1	1	1	0	1	0	0	0	0	0	0	0	0.176855	0.167545	Unique	Over-represented
PF05225.7	HTH_psq	4	0	1	6	0	11	0	9	0	0	0	0	0	0	0	0	0.186198	0.263327	Unique	Over-represented
PF01431.12	Peptidase_M13	1	1	1	1	1	1	1	1	1	0	0	0	0	0	0	0	0.0141326	1	Unique	Over-represented
PF01906.8	DUF74	1	1	1	1	1	1	1	1	1	0	0	0	0	0	0	0	0.0141326	1	Unique	Over-represented
PF02333.6	Phytase	1	1	1	1	1	1	1	1	1	0	0	0	0	0	0	0	0.0141326	1	Unique	Over-represented
PF03422.6	CBM_6	1	1	1	1	1	1	1	1	1	0	0	0	0	0	0	0	0.0141326	1	Unique	Over-represented
PF03442.5	DUF291	1	1	1	1	1	1	1	1	1	0	0	0	0	0	0	0	0.0141326	1	Unique	Over-represented
PF05238.4	CHL4	1	1	1	1	1	1	1	1	1	0	0	0	0	0	0	0	0.0141326	1	Unique	Over-represented
PF05649.4	Peptidase_M13_N	1	1	1	1	1	1	1	1	1	0	0	0	0	0	0	0	0.0141326	1	Unique	Over-represented
PF05933.4	Fun_ATP-synt_8	1	1	1	1	1	1	1	1	1	0	0	0	0	0	0	0	0.0141326	1	Unique	Over-represented
PF06165.2	Glyco_transf_36	1	1	1	1	1	1	1	1	1	0	0	0	0	0	0	0	0.0141326	1	Unique	Over-represented
PF08297.2	U3_snoRNA_assoc	1	1	1	1	1	1	1	1	1	0	0	0	0	0	0	0	0.0141326	1	Unique	Over-represented
PF08605.1	Rad9_Rad53_bind	1	1	1	1	1	1	1	1	1	0	0	0	0	0	0	0	0.0141326	1	Unique	Over-represented
PF09447.1	Cnl2_NKP2	1	1	1	1	1	1	1	1	1	0	0	0	0	0	0	0	0.0141326	1	Unique	Over-represented
PF01341.8	Glyco_hydro_6	3	3	3	3	3	3	3	3	4	0	0	0	0	0	0	1	0.0203992	3.08946e-06		Over-represented
PF00734.9	CBM_1	9	11	10	11	5	10	9	10	10	0	0	0	1	1	1	4	0.0237132	6.73789e-05		Over-represented
PF09362.1	DUF1996	13	8	8	10	11	10	12	10	10	3	3	2	3	3	2	4	0.0237132	6.81903e-05		Over-represented
PF01545.12	Cation_efflux	9	9	9	9	8	9	9	9	9	7	7	7	7	7	7	7	0.0184792	9.30607e-05		Over-represented
PF00246.15	Peptidase_M14	6	8	8	8	7	6	6	7	7	1	2	4	2	2	2	1	0.0237132	9.52703e-05		Over-represented
PF03443.5	Glyco_hydro_61	12	16	16	17	10	14	15	16	19	2	2	2	2	1	2	1	0.0237132	9.52703e-05		Over-represented
PF05922.7	Subtilisin_N	4	5	5	4	6	4	3	4	5	1	1	1	2	2	1	1	0.0237132	0.000182429		Over-represented
PF00536.21	SAM_1	6	6	6	7	5	6	6	6	5	3	4	4	3	3	4	4	0.0237132	0.000369206		Over-represented
PF02015.7	Glyco_hydro_45	2	3	3	3	2	3	3	2	2	0	1	1	0	0	1	0	0.0237132	0.000590845		Over-represented
PF01344.16	Kelch_1	12	12	11	10	11	11	8	10	10	7	5	8	6	5	6	6	0.0257188	0.000590845		Over-represented
PF08031.3	BBE	14	20	19	18	10	20	21	20	20	7	7	10	4	1	7	3	0.0257188	0.000718679		Over-represented
PF00570.14	HRDC	3	3	3	2	3	2	2	3	3	1	1	1	1	1	1	1	0.0237132	0.00127722		Over-represented
PF04389.8	Peptidase_M28	14	16	15	15	12	15	15	16	14	9	9	8	8	8	5	4	0.0237132	0.00127722		Over-represented
PF07646.6	Kelch_2	9	9	8	7	9	9	6	8	10	5	4	6	5	4	5	5	0.0248984	0.00127722		Over-represented
PF01814.14	Hemerythrin	2	3	3	3	2	2	2	3	2	1	0	1	0	0	1	1	0.0237132	0.00135577		Over-represented
PF04117.3	Mpv17_PMP22	5	7	6	6	6	6	6	6	6	5	5	4	4	4	4	4	0.0237132	0.00135577		Over-represented
PF00187.10	Chitin_bind_1	7	9	10	11	7	5	5	5	6	0	0	2	1	1	2	2	0.0245044	0.00186227		Over-represented
PF00122.11	E1-E2_ATPase	13	19	16	18	16	15	16	17	16	11	13	12	12	12	10	12	0.0250953	0.00186227		Over-represented
PF01522.12	Polysacc_deac_1	8	14	14	14	11	12	13	14	14	6	6	6	6	3	8	9	0.0292741	0.00202241		Over-represented
PF00141.14	peroxidase	5	8	8	7	7	5	6	6	5	3	4	4	3	3	4	3	0.0237132	0.00219026		Over-represented
PF00316.11	FBPase	2	2	2	2	2	2	2	2	1	1	1	1	1	1	1	1	0.0237132	0.00219026		Over-represented
PF01159.10	Ribosomal_L6e	2	2	2	2	1	2	2	2	2	1	1	1	1	1	1	1	0.0237132	0.00219026		Over-represented
PF01253.13	SUI1	4	4	3	4	4	4	4	4	4	3	3	3	3	3	3	3	0.0237132	0.00219026		Over-represented
PF01509.9	TruB_N	2	3	3	3	3	3	3	3	3	2	2	2	2	2	2	2	0.0237132	0.00219026		Over-represented
PF01661.12	Macro	2	3	3	3	3	3	3	3	3	2	2	2	2	2	2	2	0.0237132	0.00219026		Over-represented
PF01965.15	DJ-1_PfpI	8	10	9	9	5	6	6	10	6	3	3	4	3	3	2	2	0.0237132	0.00219026		Over-represented
PF03200.7	Glyco_hydro_63	2	2	2	2	1	2	2	2	2	1	1	1	1	1	1	1	0.0237132	0.00219026		Over-represented
PF03639.4	Glyco_hydro_81	2	2	2	2	2	2	2	2	1	1	1	1	1	1	1	1	0.0237132	0.00219026		Over-represented
PF05190.9	MutS_IV	3	4	4	4	4	4	4	4	4	3	3	3	3	3	3	3	0.0237132	0.00219026		Over-represented
PF06127.2	DUF962	2	2	2	2	1	2	2	2	2	1	1	1	1	1	1	1	0.0237132	0.00219026		Over-represented
PF07529.4	HSA	2	2	2	2	2	2	2	2	1	1	1	1	1	1	1	1	0.0237132	0.00219026		Over-represented
PF07958.2	DUF1688	2	2	2	2	2	2	2	2	1	1	1	1	1	1	1	1	0.0237132	0.00219026		Over-represented
PF00840.11	Glyco_hydro_7	5	6	6	6	3	3	3	4	4	1	1	2	0	0	1	2	0.023893	0.00219026		Over-represented
PF00056.14	Ldh_1_N	4	4	4	4	4	3	3	4	4	2	2	2	3	3	2	2	0.0248984	0.00219026		Over-represented
PF07973.5	tRNA_SAD	3	4	4	4	5	4	4	4	3	3	3	2	2	2	2	2	0.0272381	0.00219026		Over-represented
PF01565.14	FAD_binding_4	38	52	49	47	25	41	45	45	46	27	19	32	21	18	18	10	0.0372685	0.00219026		Over-represented
PF00989.15	PAS	4	6	6	4	5	5	7	7	5	3	4	2	3	3	2	3	0.0272381	0.00350204		Over-represented
PF08881.1	CVNH	2	3	3	3	1	2	2	2	2	1	0	1	0	0	1	1	0.0295883	0.00383098		Over-represented
PF00457.8	Glyco_hydro_11	4	5	5	5	2	4	3	5	7	0	1	2	1	1	2	2	0.0295883	0.00384397		Over-represented
PF02065.9	Melibiase	2	6	5	5	5	5	5	5	4	3	2	2	2	1	3	2	0.0450359	0.00386195		Over-represented
PF00349.12	Hexokinase_1	5	4	4	4	4	5	5	4	4	3	3	3	3	3	4	3	0.0292741	0.00403021		Over-represented
PF08079.3	Ribosomal_L30_N	2	2	2	2	2	2	1	2	2	1	1	1	1	1	0	1	0.0237132	0.00412471		Over-represented
PF00728.13	Glyco_hydro_20	3	4	3	3	2	3	3	4	3	2	1	2	2	2	1	1	0.0280607	0.00419167		Over-represented
PF04130.4	Spc97_Spc98	3	5	5	5	5	5	4	5	5	3	3	3	3	3	4	3	0.0372685	0.00432914		Over-represented
PF00481.12	PP2C	6	8	7	7	7	7	7	7	7	6	6	5	5	5	6	6	0.0257188	0.00496038		Over-represented
PF03129.11	HGTP_anticodon	6	6	6	6	6	8	7	6	6	5	4	5	5	5	5	5	0.0237132	0.00560574		Over-represented
PF00690.17	Cation_ATPase_N	9	11	10	10	9	9	7	10	8	7	8	6	6	6	5	7	0.0381197	0.00599935		Over-represented
PF07974.4	EGF_2	1	1	1	1	2	1	1	1	1	1	0	0	0	0	0	0	0.025884	0.00603339		Over-represented
PF09417.1	RNA_pol_III_C17	1	2	1	1	1	1	1	1	1	0	0	1	0	0	0	0	0.025884	0.00603339		Over-represented
PF02225.13	PA	10	12	11	11	7	10	11	11	9	7	7	7	7	7	5	3	0.0333406	0.00603339		Over-represented
PF00789.11	UBX	6	7	6	6	5	6	5	6	6	5	4	4	4	4	5	5	0.0336764	0.00603339		Over-represented
PF01569.12	PAP2	8	9	9	9	8	7	7	7	9	5	5	5	7	7	5	5	0.0368241	0.00603339		Over-represented
PF00327.11	Ribosomal_L30	2	2	2	2	2	2	2	2	2	1	1	1	1	1	0	1	0.0171833	0.0069395		Over-represented
PF01068.12	DNA_ligase_A_M	5	5	5	5	5	5	5	5	5	4	4	4	4	3	4	4	0.0171833	0.0069395		Over-represented
PF06628.3	Catalase-rel	2	2	2	2	2	2	2	2	2	0	1	1	1	1	1	1	0.0171833	0.0069395		Over-represented
PF02837.9	Glyco_hydro_2_N	7	7	6	6	6	6	6	6	10	4	6	3	3	3	2	3	0.0333406	0.00818914		Over-represented
PF07647.8	SAM_2	5	7	7	7	6	7	7	7	6	5	5	6	5	5	5	5	0.0450359	0.00867419		Over-represented
PF01764.16	Lipase_3	4	7	7	6	4	5	4	5	3	2	2	4	2	2	2	2	0.0333406	0.00951796		Over-represented
PF03006.11	HlyIII	3	5	5	5	3	4	4	5	4	3	3	2	3	2	3	2	0.0450359	0.00951796		Over-represented
PF00533.17	BRCT	10	11	11	11	8	11	11	11	11	8	10	9	8	8	8	8	0.0450359	0.0101576		Over-represented
PF00331.11	Glyco_hydro_10	5	5	5	5	3	4	4	5	7	1	2	2	0	0	0	4	0.0327932	0.010242		Over-represented
PF01095.10	Pectinesterase	4	3	3	3	3	2	2	3	3	1	1	2	0	0	2	1	0.0294336	0.0108587		Over-represented
PF00397.17	WW	9	11	11	10	10	11	10	11	11	10	9	7	8	8	8	8	0.0381197	0.0124089		Over-represented
PF09334.2	tRNA-synt_1g	7	7	7	7	7	7	7	7	7	6	6	5	6	5	6	6	0.0184792	0.0127312		Over-represented
PF01088.12	Peptidase_C12	5	6	6	5	6	4	5	6	5	4	4	4	4	4	4	4	0.0305123	0.0138834		Over-represented
PF03853.6	YjeF_N	2	2	2	2	2	1	1	2	2	1	1	1	1	1	1	0	0.0450359	0.0145625		Over-represented
PF05724.2	TPMT	1	2	2	2	2	2	2	2	1	1	1	1	1	0	1	1	0.0450359	0.0145625		Over-represented
PF06087.3	Tyr-DNA_phospho	1	2	2	2	1	2	2	2	2	1	0	1	1	1	1	1	0.0450359	0.0145625		Over-represented
PF03815.10	LCCL	2	1	1	1	1	3	3	1	2	0	0	0	0	0	0	1	0.0294336	0.0150756		Over-represented
PF00999.12	Na_H_Exchanger	8	8	7	7	7	9	8	9	8	7	7	7	6	6	6	6	0.0476525	0.0154884		Over-represented
PF00892.11	DUF6	3	3	3	3	2	4	5	2	2	2	1	0	2	1	1	1	0.0381197	0.0161914		Over-represented
PF00750.10	tRNA-synt_1d	2	2	2	2	1	1	2	2	2	1	1	1	1	1	1	1	0.0450359	0.0162279		Over-represented
PF01168.11	Ala_racemase_N	1	2	2	2	2	1	2	2	2	1	1	1	1	1	1	1	0.0450359	0.0162279		Over-represented
PF02966.7	DIM1	2	2	2	2	2	1	1	2	2	1	1	1	1	1	1	1	0.0450359	0.0162279		Over-represented
PF00195.10	Chal_sti_synt_N	1	1	1	1	1	1	1	1	1	0	1	0	0	0	0	0	0.0237132	0.0180094		Over-represented
PF00941.12	FAD_binding_5	2	2	2	2	2	2	2	2	2	2	1	1	1	1	1	1	0.0237132	0.0180094		Over-represented
PF01315.13	Ald_Xan_dh_C	2	2	2	2	2	2	2	2	2	2	1	1	1	1	1	1	0.0237132	0.0180094		Over-represented
PF01393.10	Chromo_shadow	1	1	1	1	1	1	1	1	1	1	0	0	0	0	0	0	0.0237132	0.0180094		Over-represented
PF01863.8	DUF45	1	1	1	1	1	1	1	1	1	0	0	0	0	1	0	0	0.0237132	0.0180094		Over-represented
PF02738.9	Ald_Xan_dh_C2	2	2	2	2	2	2	2	2	2	2	1	1	1	1	1	1	0.0237132	0.0180094		Over-represented
PF02797.6	Chal_sti_synt_C	1	1	1	1	1	1	1	1	1	0	1	0	0	0	0	0	0.0237132	0.0180094		Over-represented
PF03143.8	GTP_EFTU_D3	5	5	5	5	5	5	5	5	5	4	5	4	4	4	4	4	0.0237132	0.0180094		Over-represented
PF03450.8	CO_deh_flav_C	2	2	2	2	2	2	2	2	2	2	1	1	1	1	1	1	0.0237132	0.0180094		Over-represented
PF03644.4	Glyco_hydro_85	1	1	1	1	1	1	1	1	1	0	1	0	0	0	0	0	0.0237132	0.0180094		Over-represented
PF04695.4	Pex14_N	2	2	2	2	2	2	2	2	2	1	1	1	1	1	1	2	0.0237132	0.0180094		Over-represented
PF04727.4	ELMO_CED12	1	1	1	1	1	1	1	1	1	0	1	0	0	0	0	0	0.0237132	0.0180094		Over-represented
PF08518.2	GIT_SHD	1	1	1	1	1	1	1	1	1	1	0	0	0	0	0	0	0.0237132	0.0180094		Over-represented
PF08541.1	ACP_syn_III_C	1	1	1	1	1	1	1	1	1	0	1	0	0	0	0	0	0.0237132	0.0180094		Over-represented
PF02866.9	Ldh_1_C	3	3	4	4	4	3	3	4	4	2	2	2	3	3	2	1	0.0437974	0.0180094		Over-represented
PF02535.13	Zip	9	9	9	9	8	8	9	9	8	8	7	8	7	6	6	6	0.0348922	0.0195301		Over-represented
PF03595.8	C4dic_mal_tran	5	8	8	7	6	7	6	7	7	4	4	5	2	2	6	4	0.0379473	0.0196032		Over-represented
PF00689.12	Cation_ATPase_C	8	10	8	9	8	8	7	9	9	7	8	7	7	6	5	6	0.0497313	0.0283202		Over-represented
PF03664.4	Glyco_hydro_62	1	4	3	3	1	2	2	2	5	1	1	0	0	0	1	1	0.0450359	0.0292386		Over-represented
PF06422.3	PDR_CDR	7	9	9	9	7	8	8	7	8	6	7	7	4	5	5	3	0.0410048	0.0308554		Over-represented
PF03211.4	Pectate_lyase	11	5	5	5	5	3	3	5	2	1	1	3	2	1	0	0	0.0365951	0.0318399		Over-represented
PF02838.6	Glyco_hydro_20b	2	3	2	1	2	2	2	1	2	1	1	1	1	1	1	1	0.0485948	0.0318399		Over-represented
PF08267.3	Meth_synt_1	1	2	2	2	3	2	1	2	2	1	1	1	1	1	1	1	0.0485948	0.0318399		Over-represented
PF00704.19	Glyco_hydro_18	7	16	15	15	9	9	8	9	9	7	8	8	5	5	6	3	0.0452025	0.0483422		Over-represented
PF09260.2	DUF1966	0	0	0	0	0	0	0	0	0	3	3	4	4	4	4	2	0.0192209	0.00219026	Absent	Under-represented
PF01988.10	DUF125	0	0	0	0	0	0	0	0	0	3	1	3	2	2	3	2	0.0192209	0.0069395	Absent	Under-represented
PF08323.2	Glyco_transf_5	0	0	0	0	0	0	0	0	0	2	3	2	1	1	2	1	0.0192209	0.0180094	Absent	Under-represented
PF03633.6	Glyco_hydro_65C	0	0	0	0	0	0	0	0	0	1	1	1	1	1	1	0	0.0237132	0.0180094	Absent	Under-represented
PF07723.4	LRR_2	0	0	0	0	0	0	0	0	0	1	4	2	2	2	2	1	0.0192209	0.0291291	Absent	Under-represented
PF01195.10	Pept_tRNA_hydro	0	0	0	0	0	0	0	0	0	1	0	1	1	0	1	1	0.0485948	0.0810429	Absent	Under-represented
PF01607.15	CBM_14	0	0	0	0	0	0	0	0	0	1	0	1	1	1	1	0	0.0485948	0.0810429	Absent	Under-represented
PF01637.9	Arch_ATPase	0	0	0	0	0	0	0	0	0	1	0	1	1	1	1	0	0.0485948	0.0810429	Absent	Under-represented
PF03439.4	Supt5	0	0	0	0	0	0	0	0	0	1	0	1	1	1	1	0	0.0485948	0.0810429	Absent	Under-represented
PF07908.3	D-aminoacyl_C	0	0	0	0	0	0	0	0	0	1	0	1	1	1	1	0	0.0485948	0.0810429	Absent	Under-represented
PF08666.3	SAF	0	0	0	0	0	0	0	0	0	1	0	1	1	1	1	0	0.0485948	0.0810429	Absent	Under-represented
PF08892.2	YqcI_YcgG	0	0	0	0	0	0	0	0	0	0	1	1	1	1	1	0	0.0485948	0.0810429	Absent	Under-represented
PF07779.3	Cas1p	0	0	0	0	0	0	0	0	0	1	0	1	2	2	1	0	0.0527757	0.144942	Absent	Under-represented
PF01833.15	TIG	0	0	0	0	0	0	0	0	0	0	0	1	1	1	0	1	0.108835	0.197914	Absent	Under-represented
PF02810.6	SEC-C	0	0	0	0	0	0	0	0	0	1	0	0	1	1	0	1	0.108835	0.197914	Absent	Under-represented
PF04960.6	Glutaminase	0	0	0	0	0	0	0	0	0	1	1	1	1	0	0	0	0.108835	0.197914	Absent	Under-represented
PF05089.3	NAGLU	0	0	0	0	0	0	0	0	0	1	0	0	1	1	0	1	0.108835	0.197914	Absent	Under-represented
PF05960.2	DUF885	0	0	0	0	0	0	0	0	0	1	0	0	1	1	1	0	0.108835	0.197914	Absent	Under-represented
PF06456.4	Arfaptin	0	0	0	0	0	0	0	0	0	1	0	0	1	1	1	0	0.108835	0.197914	Absent	Under-represented
PF07171.3	MlrC_C	0	0	0	0	0	0	0	0	0	1	1	0	1	1	0	0	0.108835	0.197914	Absent	Under-represented
PF07929.2	PRiA4_ORF3	0	0	0	0	0	0	0	0	0	1	0	1	1	1	0	0	0.108835	0.197914	Absent	Under-represented
PF07932.3	DAP_C	0	0	0	0	0	0	0	0	0	1	1	0	1	1	0	0	0.108835	0.197914	Absent	Under-represented
PF08532.1	Glyco_hydro_42M	0	0	0	0	0	0	0	0	0	1	0	1	1	0	1	0	0.108835	0.197914	Absent	Under-represented
PF08975.1	DUF1868	0	0	0	0	0	0	0	0	0	0	1	0	1	1	0	1	0.108835	0.197914	Absent	Under-represented
PF01689.7	Hyratase_decarb	0	0	0	0	0	0	0	0	0	0	0	1	1	1	2	0	0.111814	0.28107	Absent	Under-represented
PF02071.11	NSF	0	0	0	0	0	0	0	0	0	1	1	1	1	1	1	1	0.0141326	1	Absent	Under-represented
PF04437.4	RINT1_TIP1	0	0	0	0	0	0	0	0	0	1	1	1	1	1	1	1	0.0141326	1	Absent	Under-represented
PF04934.5	MED6	0	0	0	0	0	0	0	0	0	1	1	1	1	1	1	1	0.0141326	1	Absent	Under-represented
PF05690.5	ThiG	0	0	0	0	0	0	0	0	0	1	1	1	1	1	1	1	0.0141326	1	Absent	Under-represented
PF06839.3	zf-GRF	0	0	0	0	0	0	0	0	0	1	1	1	1	1	1	1	0.0141326	1	Absent	Under-represented
PF08925.2	DUF1907	0	0	0	0	0	0	0	0	0	1	1	1	1	1	1	1	0.0141326	1	Absent	Under-represented
PF00717.14	Peptidase_S24	1	1	1	1	1	1	1	1	2	3	2	3	3	3	3	3	0.0237132	0.000176782		Under-represented
PF02734.8	Dak2	1	2	2	2	2	2	2	2	2	3	3	3	3	3	3	3	0.0184792	0.00127722		Under-represented
PF08739.1	PalI	0	1	1	1	1	1	1	1	1	2	2	2	2	2	2	2	0.0184792	0.00127722		Under-represented
PF00632.16	HECT	4	5	5	5	5	5	5	5	5	6	6	7	6	6	6	6	0.0203992	0.00186227		Under-represented
PF01553.12	Acyltransferase	6	6	6	5	6	6	6	6	5	7	8	8	7	7	7	8	0.0237132	0.00219026		Under-represented
PF04142.6	Nuc_sug_transp	1	1	1	1	1	1	1	1	2	2	2	2	2	2	2	2	0.0237132	0.00219026		Under-represented
PF09286.2	Pro-kuma_activ	3	5	4	3	2	6	5	5	6	10	10	9	8	7	8	7	0.0246878	0.00219026		Under-represented
PF00575.14	S1	2	3	2	3	3	3	3	2	3	4	4	4	4	4	3	4	0.0292741	0.00403021		Under-represented
PF00180.11	Iso_dh	7	7	7	7	5	7	7	6	7	9	9	8	8	8	8	8	0.0237132	0.00412471		Under-represented
PF03959.4	FSH1	1	2	2	1	1	1	1	1	2	5	4	3	3	3	5	4	0.0237132	0.00419167		Under-represented
PF03659.5	Glyco_hydro_71	0	0	0	0	1	0	0	0	0	2	1	2	2	2	1	1	0.0237132	0.00432914		Under-represented
PF06516.2	NUP	0	0	0	0	0	0	0	0	1	1	1	2	1	1	2	1	0.0237132	0.00869424		Under-represented
PF03810.10	IBN_N	6	7	7	7	6	8	7	7	9	9	9	9	9	9	9	9	0.030458	0.0093053		Under-represented
PF03737.6	Methyltransf_6	0	1	1	0	0	0	0	0	0	2	1	1	1	1	1	1	0.0450359	0.0145625		Under-represented
PF02985.13	HEAT	31	34	34	34	30	31	32	34	35	35	37	34	38	38	36	37	0.0450359	0.0154884		Under-represented
PF00332.9	Glyco_hydro_17	2	2	2	2	2	3	4	3	3	6	4	8	6	5	6	4	0.025884	0.0162279		Under-represented
PF07859.4	Abhydrolase_3	13	17	15	14	12	14	14	17	15	24	20	23	21	18	16	21	0.0365951	0.0162279		Under-represented
PF03676.5	UPF0183	0	0	0	0	1	1	0	0	0	1	1	1	1	1	1	1	0.0450359	0.0162279		Under-represented
PF02733.8	Dak1	2	2	2	2	2	2	2	2	2	2	3	3	3	3	3	3	0.0237132	0.0180094		Under-represented
PF03917.8	GSH_synth_ATP	1	1	1	1	1	1	1	1	1	2	1	2	2	2	2	2	0.0237132	0.0180094		Under-represented
PF05390.2	KRE9	1	1	1	1	1	1	1	1	1	2	2	2	2	2	2	1	0.0237132	0.0180094		Under-represented
PF01501.11	Glyco_transf_8	3	6	5	5	4	5	4	4	5	7	6	7	6	6	7	5	0.0490283	0.0180094		Under-represented
PF03169.6	OPT	2	4	4	3	3	3	2	4	4	9	8	8	11	10	6	4	0.0333406	0.0230052		Under-represented
PF00128.15	Alpha-amylase	6	6	6	6	6	7	6	6	6	12	13	14	12	12	11	6	0.0393415	0.0244887		Under-represented
PF01226.8	Form_Nir_trans	2	0	0	0	1	0	0	0	0	1	1	2	3	3	4	3	0.0381197	0.0284419		Under-represented
PF02666.6	PS_Dcarbxylase	3	3	3	3	1	3	2	3	2	4	3	4	4	4	4	3	0.0497313	0.0304308		Under-represented
PF00581.11	Rhodanese	4	4	4	4	4	4	3	4	4	4	5	6	5	5	6	5	0.0295883	0.0314751		Under-represented
PF00686.10	CBM_20	2	2	2	2	3	2	2	2	3	4	4	5	4	4	4	2	0.0468304	0.0314751		Under-represented
PF00682.10	HMGL-like	4	4	4	4	3	5	4	4	4	6	6	7	6	5	6	4	0.0450359	0.0318399		Under-represented
PF00884.14	Sulfatase	2	2	2	2	1	2	2	2	3	4	5	4	3	3	6	3	0.0248984	0.0400953		Under-represented
PF00230.11	MIP	7	7	7	5	6	7	7	8	7	11	10	12	8	8	11	8	0.026927	0.0400953		Under-represented
PF02775.12	TPP_enzyme_C	3	4	4	4	2	3	3	2	3	10	6	9	5	4	8	6	0.0298308	0.0444665		Under-represented
PF00551.10	Formyl_trans_N	3	3	3	3	3	3	3	3	3	3	4	4	4	4	5	4	0.0248984	0.0483422		Under-represented
PF01735.9	PLA2_B	2	2	2	2	2	2	2	2	2	3	4	3	3	3	3	2	0.0248984	0.0483422		Under-represented
PF07524.4	Bromo_TP	2	2	2	2	2	2	2	2	2	4	3	3	3	3	3	2	0.0248984	0.0483422		Under-represented
PF00920.12	ILVD_EDD	2	2	2	2	2	2	2	2	2	4	4	4	3	3	2	3	0.0260258	0.0497529		Under-represented

## Sheet: Necrotrophic_versus_Hemibiotrop
Domain	Description	Altbr1 (in)	CocheC5_3 (in)	CocheC4_1 (in)	Pyrtt1 (in)	Pyrtr1 (in)	Stano2 (in)	Clafu1 (out)	Mycfi2 (out)	Mycgr3 (out)	Sepmu1 (out)	Seppo1 (out)	Cocsa1 (out)	Settu1 (out)	Lepmu1 (out)	Dotse1 (out)	P-value (Wilcox, two-sided and adjusted with BH)	P-value (T-test, two-sided and adjusted with BH)	Unique/absent in ingroup	Over/under-represented in ingroup
PF01139.8	UPF0027	0	0	0	1	1	1	0	0	0	0	0	0	0	0	0	0.504982	0.594199	Unique	Over-represented
PF02176.9	zf-TRAF	1	0	0	1	1	0	0	0	0	0	0	0	0	0	0	0.504982	0.594199	Unique	Over-represented
PF03594.4	BenE	0	1	1	0	0	1	0	0	0	0	0	0	0	0	0	0.504982	0.594199	Unique	Over-represented
PF00221.10	PAL	1	0	0	1	0	2	0	0	0	0	0	0	0	0	0	0.504982	0.712542	Unique	Over-represented
PF02071.11	NSF	0	0	0	0	0	0	1	1	1	1	1	0	0	0	1	0.504982	0.171238	Absent	Under-represented
PF03633.6	Glyco_hydro_65C	0	0	0	0	0	0	1	1	1	1	1	0	0	0	1	0.504982	0.171238	Absent	Under-represented
PF03659.5	Glyco_hydro_71	0	0	0	0	0	0	2	2	1	2	2	0	0	1	1	0.504982	0.171238	Absent	Under-represented
PF04437.4	RINT1_TIP1	0	0	0	0	0	0	1	1	1	1	1	0	0	0	1	0.504982	0.171238	Absent	Under-represented
PF04934.5	MED6	0	0	0	0	0	0	1	1	1	1	1	0	0	0	1	0.504982	0.171238	Absent	Under-represented
PF05690.5	ThiG	0	0	0	0	0	0	1	1	1	1	1	0	0	0	1	0.504982	0.171238	Absent	Under-represented
PF06839.3	zf-GRF	0	0	0	0	0	0	1	1	1	1	1	0	0	0	1	0.504982	0.171238	Absent	Under-represented
PF08925.2	DUF1907	0	0	0	0	0	0	1	1	1	1	1	0	0	0	1	0.504982	0.171238	Absent	Under-represented
PF09260.2	DUF1966	0	0	0	0	0	0	4	3	3	4	4	0	0	0	4	0.504982	0.183108	Absent	Under-represented
PF01988.10	DUF125	0	0	0	0	0	0	3	3	1	2	2	0	0	0	3	0.504982	0.234477	Absent	Under-represented
PF01607.15	CBM_14	0	0	0	0	0	0	1	1	0	1	1	0	0	0	1	0.504982	0.248328	Absent	Under-represented
PF01637.9	Arch_ATPase	0	0	0	0	0	0	1	1	0	1	1	0	0	0	1	0.504982	0.248328	Absent	Under-represented
PF03439.4	Supt5	0	0	0	0	0	0	1	1	0	1	1	0	0	0	1	0.504982	0.248328	Absent	Under-represented
PF07723.4	LRR_2	0	0	0	0	0	0	2	1	4	2	2	0	0	0	2	0.504982	0.248328	Absent	Under-represented
PF07908.3	D-aminoacyl_C	0	0	0	0	0	0	1	1	0	1	1	0	0	0	1	0.504982	0.248328	Absent	Under-represented
PF08323.2	Glyco_transf_5	0	0	0	0	0	0	2	2	3	1	1	0	0	0	2	0.504982	0.248328	Absent	Under-represented
PF08666.3	SAF	0	0	0	0	0	0	1	1	0	1	1	0	0	0	1	0.504982	0.248328	Absent	Under-represented
PF08892.2	YqcI_YcgG	0	0	0	0	0	0	1	0	1	1	1	0	0	0	1	0.504982	0.248328	Absent	Under-represented
PF02655.5	ATP-grasp_3	0	0	0	0	0	0	1	0	1	0	1	0	0	1	2	0.512217	0.330634	Absent	Under-represented
PF07779.3	Cas1p	0	0	0	0	0	0	1	1	0	2	2	0	0	0	1	0.517771	0.338296	Absent	Under-represented
PF07676.3	PD40	0	0	0	0	0	0	3	1	1	0	0	0	0	1	1	0.512217	0.466546	Absent	Under-represented

## Sheet: Cereals_versus_other_Dothids
Domain	Description	CocheC5_3 (in)	CocheC4_1 (in)	Cocsa1 (in)	Settu1 (in)	Mycgr3 (in)	Pyrtt1 (in)	Pyrtr1 (in)	Stano2 (in)	Altbr1 (out)	Lepmu1 (out)	Hyspu1 (out)	Rhyru1 (out)	Mycfi2 (out)	Clafu1 (out)	Bauco1 (out)	Dotse1 (out)	Seppo1 (out)	Sepmu1 (out)	P-value (Wilcox, two-sided and adjusted with BH)	P-value (T-test, two-sided and adjusted with BH)	Unique/absent in ingroup	Over/under-represented in ingroup
PF03893.7	Lipase3_N	1	1	1	1	0	1	1	1	0	0	0	0	0	0	0	0	0	0	0.197618	0.0428408	Unique	Over-represented
PF02791.8	DDT	1	1	1	1	0	1	1	0	0	0	0	0	0	0	0	0	0	0	0.197618	0.0941049	Unique	Over-represented
PF06888.3	Put_Phosphatase	1	1	1	0	0	0	1	1	0	0	0	0	0	0	0	0	0	0	0.197618	0.200921	Unique	Over-represented
PF06280.3	DUF1034	2	2	0	2	0	1	1	0	0	0	0	0	0	0	0	0	0	0	0.197618	0.257218	Unique	Over-represented
PF00001.12	7tm_1	1	1	1	1	0	0	0	0	0	0	0	0	0	0	0	0	0	0	0.29628	0.341884	Unique	Over-represented
PF01498.9	Transposase_5	0	0	4	3	4	2	0	0	0	0	0	0	0	0	0	0	0	0	0.309478	0.371165	Unique	Over-represented
PF07779.3	Cas1p	0	0	0	0	0	0	0	0	0	0	1	1	1	1	0	1	2	2	0.197618	0.120865	Absent	Under-represented
PF01195.10	Pept_tRNA_hydro	0	0	0	0	0	0	0	0	0	0	0	1	1	1	1	1	0	1	0.23167	0.136829	Absent	Under-represented
PF01833.15	TIG	0	0	0	0	0	0	0	0	0	0	1	1	0	1	1	0	1	1	0.23167	0.136829	Absent	Under-represented
PF05960.2	DUF885	0	0	0	0	0	0	0	0	0	0	1	1	1	0	0	1	1	1	0.23167	0.136829	Absent	Under-represented
PF08666.3	SAF	0	0	0	0	0	0	0	0	0	0	0	1	1	1	0	1	1	1	0.23167	0.136829	Absent	Under-represented
PF01607.15	CBM_14	0	0	0	0	0	0	0	0	0	0	0	0	1	1	0	1	1	1	0.321286	0.221752	Absent	Under-represented
PF01637.9	Arch_ATPase	0	0	0	0	0	0	0	0	0	0	0	0	1	1	0	1	1	1	0.321286	0.221752	Absent	Under-represented
PF02810.6	SEC-C	0	0	0	0	0	0	0	0	0	0	1	0	1	0	1	0	1	1	0.321286	0.221752	Absent	Under-represented
PF03439.4	Supt5	0	0	0	0	0	0	0	0	0	0	0	0	1	1	0	1	1	1	0.321286	0.221752	Absent	Under-represented
PF04181.4	DUF408	0	0	0	0	0	0	0	0	0	0	1	1	0	0	1	0	1	1	0.321286	0.221752	Absent	Under-represented
PF05089.3	NAGLU	0	0	0	0	0	0	0	0	0	0	0	1	1	0	1	0	1	1	0.321286	0.221752	Absent	Under-represented
PF07908.3	D-aminoacyl_C	0	0	0	0	0	0	0	0	0	0	0	0	1	1	0	1	1	1	0.321286	0.221752	Absent	Under-represented
PF07929.2	PRiA4_ORF3	0	0	0	0	0	0	0	0	0	0	1	0	1	1	0	0	1	1	0.321286	0.221752	Absent	Under-represented
PF01689.7	Hyratase_decarb	0	0	0	0	0	0	0	0	0	0	0	1	0	1	0	2	1	1	0.323839	0.292783	Absent	Under-represented

## Sheet: Trees_versus_other_Dothids
Domain	Description	Dotse1 (in)	Sepmu1 (in)	Seppo1 (in)	CocheC5_3 (out)	CocheC4_1 (out)	Cocsa1 (out)	Settu1 (out)	Mycgr3 (out)	Pyrtt1 (out)	Pyrtr1 (out)	Stano2 (out)	Altbr1 (out)	Lepmu1 (out)	Hyspu1 (out)	Rhyru1 (out)	Mycfi2 (out)	Clafu1 (out)	Bauco1 (out)	P-value (Wilcox, two-sided and adjusted with BH)	P-value (T-test, two-sided and adjusted with BH)	Unique/absent in ingroup	Over/under-represented in ingroup
PF02617.8	ClpS	0	1	1	0	0	0	0	0	0	0	0	0	0	0	0	0	0	0	0.25998	0.593715	Unique	Over-represented
PF07228.3	SpoIIE	0	1	1	0	0	0	0	0	0	0	0	0	0	0	0	0	0	0	0.25998	0.593715	Unique	Over-represented
PF08282.3	Hydrolase_3	0	1	1	0	0	0	0	0	0	0	0	0	0	0	0	0	0	0	0.25998	0.593715	Unique	Over-represented
PF02698.8	DUF218	1	1	1	0	0	0	0	0	0	0	0	0	0	0	0	0	0	0	0.070835	1	Unique	Over-represented
PF02567.7	PhzC-PhzF	0	0	0	1	1	1	1	1	1	1	1	1	1	1	1	0	1	1	0.242347	5.38219e-07	Absent	Under-represented
PF07544.4	CSE2	0	0	0	1	1	1	1	0	1	1	1	1	1	1	1	1	1	1	0.242347	5.38219e-07	Absent	Under-represented
PF08321.3	PPP5	0	0	0	1	1	1	1	0	1	1	1	1	1	1	1	1	1	1	0.242347	5.38219e-07	Absent	Under-represented
PF02417.6	Chromate_transp	0	0	0	1	1	1	1	1	1	1	1	1	1	0	1	0	1	1	0.321014	2.03246e-05	Absent	Under-represented
PF00331.11	Glyco_hydro_10	0	0	0	5	5	5	5	2	4	4	7	5	3	3	4	1	2	4	0.433715	2.03246e-05	Absent	Under-represented
PF07632.2	DUF1593	0	0	0	1	1	1	1	0	1	1	1	1	1	1	1	1	2	0	0.386599	0.000150687	Absent	Under-represented
PF07683.5	CobW_C	0	0	0	1	1	1	1	1	1	1	2	1	1	0	1	1	1	0	0.386599	0.000150687	Absent	Under-represented
PF02116.6	STE2	0	0	0	1	1	1	1	1	1	1	0	1	1	1	1	0	1	0	0.433715	0.000188679	Absent	Under-represented
PF03644.4	Glyco_hydro_85	0	0	0	1	1	1	1	1	1	1	1	1	1	1	1	0	0	0	0.433715	0.000188679	Absent	Under-represented
PF03962.6	Mnd1	0	0	0	1	1	1	1	1	1	1	0	1	1	1	1	1	0	0	0.433715	0.000188679	Absent	Under-represented
PF04727.4	ELMO_CED12	0	0	0	1	1	1	1	1	1	1	1	1	1	1	1	0	0	0	0.433715	0.000188679	Absent	Under-represented
PF06827.5	zf-FPG_IleRS	0	0	0	1	1	1	1	1	0	0	0	1	1	1	1	1	1	1	0.433715	0.000188679	Absent	Under-represented
PF08518.2	GIT_SHD	0	0	0	1	1	1	1	0	1	1	1	1	1	1	1	1	0	0	0.433715	0.000188679	Absent	Under-represented
PF03486.5	HI0933_like	0	0	0	1	1	1	1	1	2	1	1	1	1	0	0	1	1	0	0.442661	0.000689051	Absent	Under-represented
PF00195.10	Chal_sti_synt_N	0	0	0	1	1	1	1	1	1	1	1	1	1	1	0	0	0	0	0.442661	0.000715455	Absent	Under-represented
PF01341.8	Glyco_hydro_6	0	0	0	3	3	3	3	0	3	3	4	3	3	2	2	0	0	1	0.442661	0.000715455	Absent	Under-represented
PF02797.6	Chal_sti_synt_C	0	0	0	1	1	1	1	1	1	1	1	1	1	1	0	0	0	0	0.442661	0.000715455	Absent	Under-represented
PF03442.5	DUF291	0	0	0	1	1	1	1	0	1	1	1	1	1	1	1	0	0	0	0.442661	0.000715455	Absent	Under-represented
PF03577.6	Peptidase_C69	0	0	0	1	1	1	1	0	1	1	1	1	0	0	1	1	1	0	0.442661	0.000715455	Absent	Under-represented
PF05238.4	CHL4	0	0	0	1	1	1	1	0	1	1	1	1	1	1	1	0	0	0	0.442661	0.000715455	Absent	Under-represented
PF05933.4	Fun_ATP-synt_8	0	0	0	1	1	1	1	0	1	1	1	1	1	1	1	0	0	0	0.442661	0.000715455	Absent	Under-represented
PF06165.2	Glyco_transf_36	0	0	0	1	1	1	1	0	1	1	1	1	1	1	1	0	0	0	0.442661	0.000715455	Absent	Under-represented
PF06963.3	FPN1	0	0	0	1	1	1	1	1	1	1	0	1	1	0	0	0	1	1	0.442661	0.000715455	Absent	Under-represented
PF07080.2	DUF1348	0	0	0	1	1	1	1	0	1	1	1	0	0	1	1	1	0	1	0.442661	0.000715455	Absent	Under-represented
PF08541.1	ACP_syn_III_C	0	0	0	1	1	1	1	1	1	1	1	1	1	1	0	0	0	0	0.442661	0.000715455	Absent	Under-represented
PF08605.1	Rad9_Rad53_bind	0	0	0	1	1	1	1	0	1	1	1	1	1	1	1	0	0	0	0.442661	0.000715455	Absent	Under-represented
PF08696.2	Dna2	0	0	0	1	0	1	0	0	1	1	1	1	1	1	1	1	1	0	0.442661	0.000715455	Absent	Under-represented
PF09416.1	UPF1_Zn_bind	0	0	0	0	0	0	0	1	1	1	1	1	1	1	1	1	1	1	0.442661	0.000715455	Absent	Under-represented
PF09447.1	Cnl2_NKP2	0	0	0	1	1	1	1	0	1	1	1	1	1	1	1	0	0	0	0.442661	0.000715455	Absent	Under-represented
PF01906.8	DUF74	0	0	0	1	1	1	1	0	1	1	1	1	1	2	1	0	0	0	0.442661	0.00198552	Absent	Under-represented
PF07366.3	SnoaL	0	0	0	1	1	2	0	1	1	1	1	1	0	1	1	0	0	1	0.442661	0.00198552	Absent	Under-represented
PF07974.4	EGF_2	0	0	0	1	1	1	1	0	1	1	1	1	2	0	1	1	0	0	0.442661	0.00198552	Absent	Under-represented
PF09417.1	RNA_pol_III_C17	0	0	0	2	1	1	1	0	1	1	1	1	1	0	1	0	1	0	0.442661	0.00198552	Absent	Under-represented
PF00375.9	SDF	0	0	0	1	1	1	1	1	1	1	1	1	0	0	0	1	0	0	0.443036	0.00229262	Absent	Under-represented
PF01126.11	Heme_oxygenase	0	0	0	1	1	1	1	0	1	1	0	1	1	1	1	0	0	0	0.443036	0.00229262	Absent	Under-represented
PF01393.10	Chromo_shadow	0	0	0	1	1	1	1	0	1	1	1	1	1	0	0	1	0	0	0.443036	0.00229262	Absent	Under-represented
PF04086.4	SRP-alpha_N	0	0	0	1	1	1	1	0	1	1	0	0	1	1	1	0	0	1	0.443036	0.00229262	Absent	Under-represented
PF04143.5	DUF395	0	0	0	1	1	1	1	1	1	1	0	1	1	1	0	0	0	0	0.443036	0.00229262	Absent	Under-represented
PF04428.5	Choline_kin_N	0	0	0	1	1	1	1	1	1	0	1	1	1	0	1	0	0	0	0.443036	0.00229262	Absent	Under-represented
PF05032.3	Spo12	0	0	0	1	1	1	1	0	1	1	0	1	1	1	1	0	0	0	0.443036	0.00229262	Absent	Under-represented
PF06859.3	Bin3	0	0	0	1	1	1	1	0	1	1	0	1	1	1	1	0	0	0	0.443036	0.00229262	Absent	Under-represented
PF07156.5	Prenylcys_lyase	0	0	0	1	1	1	1	0	1	1	0	1	1	1	1	0	0	0	0.443036	0.00229262	Absent	Under-represented
PF07912.4	ERp29_N	0	0	0	1	1	1	1	0	1	1	0	0	1	1	1	0	0	1	0.443036	0.00229262	Absent	Under-represented
PF08297.2	U3_snoRNA_assoc	0	0	0	1	1	1	1	0	1	1	1	1	1	1	0	0	0	0	0.443036	0.00229262	Absent	Under-represented
PF08631.1	SPO22	0	0	0	1	1	1	1	0	1	1	0	1	1	1	0	0	0	1	0.443036	0.00229262	Absent	Under-represented
PF08672.2	APC2	0	0	0	1	1	1	1	0	1	0	1	1	1	1	1	0	0	0	0.443036	0.00229262	Absent	Under-represented
PF09496.1	Cenp-O	0	0	0	1	1	1	1	0	1	1	1	1	0	1	1	0	0	0	0.443036	0.00229262	Absent	Under-represented
PF09248.1	DUF1965	0	0	0	2	2	2	2	0	1	1	2	1	0	0	1	1	0	1	0.443036	0.00270375	Absent	Under-represented
PF05705.5	DUF829	0	0	0	1	1	1	1	0	0	1	2	2	2	1	2	1	0	0	0.443036	0.00286825	Absent	Under-represented
PF00209.9	SNF	0	0	0	1	1	1	3	1	2	3	2	1	1	0	0	1	2	0	0.442661	0.00290925	Absent	Under-represented
PF03159.9	XRN_N	0	0	0	0	0	0	1	0	2	2	2	2	2	2	2	2	2	0	0.47777	0.00290925	Absent	Under-represented
PF01828.8	Peptidase_A4	0	0	0	1	1	1	1	3	1	1	0	0	0	2	2	2	0	1	0.443036	0.00597846	Absent	Under-represented
PF00165.14	HTH_AraC	0	0	0	1	1	0	1	0	0	0	1	2	2	1	1	1	0	1	0.47777	0.00612256	Absent	Under-represented
PF01020.8	Ribosomal_L40e	0	0	0	0	0	0	1	0	1	1	0	1	1	1	1	1	1	0	0.516627	0.00612256	Absent	Under-represented
PF01431.12	Peptidase_M13	0	0	0	1	1	1	1	0	1	1	1	1	1	0	0	0	0	0	0.516627	0.00612256	Absent	Under-represented
PF02333.6	Phytase	0	0	0	1	1	1	1	0	1	1	1	1	1	0	0	0	0	0	0.516627	0.00612256	Absent	Under-represented
PF03422.6	CBM_6	0	0	0	1	1	1	1	0	1	1	1	1	1	0	0	0	0	0	0.516627	0.00612256	Absent	Under-represented
PF03576.5	Peptidase_S58	0	0	0	1	1	1	0	0	1	1	1	1	0	1	1	0	0	0	0.516627	0.00612256	Absent	Under-represented
PF03725.6	RNase_PH_C	0	0	0	1	1	1	1	0	1	1	1	1	0	0	0	0	0	1	0.516627	0.00612256	Absent	Under-represented
PF05649.4	Peptidase_M13_N	0	0	0	1	1	1	1	0	1	1	1	1	1	0	0	0	0	0	0.516627	0.00612256	Absent	Under-represented
PF07778.2	Mis6	0	0	0	1	1	1	1	0	1	1	0	0	1	1	1	0	0	0	0.516627	0.00612256	Absent	Under-represented
PF08101.2	DUF1708	0	0	0	1	1	1	1	0	1	1	0	1	0	1	1	0	0	0	0.516627	0.00612256	Absent	Under-represented
PF08611.1	DUF1774	0	0	0	1	1	1	1	0	1	1	0	0	1	1	1	0	0	0	0.516627	0.00612256	Absent	Under-represented
PF03815.10	LCCL	0	0	0	1	1	1	1	0	3	3	2	2	1	0	0	0	0	1	0.5119	0.0150171	Absent	Under-represented
PF05433.6	Rick_17kDa_Anti	0	0	0	1	2	2	1	0	1	1	2	1	0	1	0	0	0	0	0.58696	0.0150171	Absent	Under-represented
PF02157.6	Man-6-P_recep	0	0	0	1	1	1	1	0	1	1	0	1	0	0	0	0	1	0	0.657676	0.0150171	Absent	Under-represented
PF02755.6	RPEL	0	0	0	1	1	1	1	0	1	1	0	0	1	0	1	0	0	0	0.657676	0.0150171	Absent	Under-represented
PF03059.7	NAS	0	0	0	1	1	1	1	0	0	0	1	1	1	0	1	0	0	0	0.657676	0.0150171	Absent	Under-represented
PF03235.5	DUF262	0	0	0	1	1	0	1	0	1	1	0	0	1	1	1	0	0	0	0.657676	0.0150171	Absent	Under-represented
PF04774.6	HABP4_PAI-RBP1	0	0	0	1	1	1	1	0	0	1	0	1	1	0	0	0	1	0	0.657676	0.0150171	Absent	Under-represented
PF04908.6	SH3BGR	0	0	0	1	1	1	1	1	1	1	0	1	0	0	0	0	0	0	0.657676	0.0150171	Absent	Under-represented
PF06041.2	DUF924	0	0	0	1	1	1	1	0	0	0	1	1	0	1	1	0	0	0	0.657676	0.0150171	Absent	Under-represented
PF06325.4	PrmA	0	0	0	1	1	1	1	0	0	1	1	1	1	0	0	0	0	0	0.657676	0.0150171	Absent	Under-represented
PF07792.3	DUF1630	0	0	0	1	1	1	1	0	1	1	0	0	1	1	0	0	0	0	0.657676	0.0150171	Absent	Under-represented
PF09668.1	Asp_protease	0	0	0	0	0	0	0	0	1	1	1	1	1	1	1	0	1	0	0.657676	0.0150171	Absent	Under-represented
PF08423.2	Rad51	0	0	0	0	0	0	0	0	3	2	2	2	2	2	2	0	2	0	0.68582	0.0180332	Absent	Under-represented
PF05729.3	NACHT	0	0	0	7	6	17	6	0	0	0	0	0	1	1	2	1	0	0	0.699032	0.250467	Absent	Under-represented

## Sheet: Saprotrophs_versus_other_Dothid
Domain	Description	Hyspu1 (in)	Rhyru1 (in)	Bauco1 (in)	CocheC5_3 (out)	CocheC4_1 (out)	Cocsa1 (out)	Settu1 (out)	Mycgr3 (out)	Pyrtt1 (out)	Pyrtr1 (out)	Stano2 (out)	Altbr1 (out)	Lepmu1 (out)	Mycfi2 (out)	Clafu1 (out)	Dotse1 (out)	Sepmu1 (out)	Seppo1 (out)	P-value (Wilcox, two-sided and adjusted with BH)	P-value (T-test, two-sided and adjusted with BH)	Unique/absent in ingroup	Over/under-represented in ingroup
PF04457.3	DUF504	1	1	0	0	0	0	0	0	0	0	0	0	0	0	0	0	0	0	0.136069	0.869543	Unique	Over-represented
PF04607.8	RelA_SpoT	1	2	0	0	0	0	0	0	0	0	0	0	0	0	0	0	0	0	0.136069	0.869543	Unique	Over-represented
PF05547.2	Peptidase_M6	1	1	0	0	0	0	0	0	0	0	0	0	0	0	0	0	0	0	0.136069	0.869543	Unique	Over-represented
PF06108.3	DUF952	1	1	0	0	0	0	0	0	0	0	0	0	0	0	0	0	0	0	0.136069	0.869543	Unique	Over-represented
PF07543.3	PGA2	1	1	0	0	0	0	0	0	0	0	0	0	0	0	0	0	0	0	0.136069	0.869543	Unique	Over-represented
PF09161.1	DUF1941	1	1	0	0	0	0	0	0	0	0	0	0	0	0	0	0	0	0	0.136069	0.869543	Unique	Over-represented
PF09587.1	PGA_cap	1	0	1	0	0	0	0	0	0	0	0	0	0	0	0	0	0	0	0.136069	0.869543	Unique	Over-represented
PF04911.3	ATP-synt_J	0	0	0	1	1	1	1	1	1	1	1	1	1	1	1	1	1	0	0.136069	3.57128e-07	Absent	Under-represented
PF04952.5	AstE_AspA	0	0	0	1	1	1	1	1	1	1	1	1	1	1	1	0	1	1	0.136069	3.57128e-07	Absent	Under-represented
PF09206.2	ArabFuran-catal	0	0	0	1	1	1	1	1	1	1	1	1	0	1	1	1	1	1	0.136069	3.57128e-07	Absent	Under-represented
PF09576.1	COX9	0	0	0	1	1	1	1	1	1	1	0	1	1	1	1	1	1	1	0.136069	3.57128e-07	Absent	Under-represented
PF01900.10	RNase_P_Rpp14	0	0	0	1	1	2	1	1	1	1	1	0	1	1	1	1	1	1	0.149535	1.59567e-05	Absent	Under-represented
PF04419.5	4F5	0	0	0	1	1	1	1	1	1	1	0	1	1	1	0	1	1	1	0.245774	2.83209e-05	Absent	Under-represented
PF05270.4	AbfB	0	0	0	1	1	1	1	0	1	1	1	1	0	1	1	1	1	1	0.245774	2.83209e-05	Absent	Under-represented
PF01868.7	UPF0086	0	0	0	1	1	0	1	0	1	1	1	0	1	1	1	1	1	1	0.438524	0.000375587	Absent	Under-represented
PF03486.5	HI0933_like	0	0	0	1	1	1	1	1	2	1	1	1	1	1	1	0	0	0	0.438524	0.00162102	Absent	Under-represented
PF08212.3	Lipocalin_2	0	0	0	1	1	1	1	0	0	0	1	1	1	1	1	0	1	1	0.438524	0.00233567	Absent	Under-represented
PF03022.7	MRJP	0	0	0	0	0	1	1	1	1	1	1	2	1	0	0	1	1	1	0.438524	0.00654191	Absent	Under-represented
PF00375.9	SDF	0	0	0	1	1	1	1	1	1	1	1	1	0	1	0	0	0	0	0.505302	0.00804792	Absent	Under-represented
PF01393.10	Chromo_shadow	0	0	0	1	1	1	1	0	1	1	1	1	1	1	0	0	0	0	0.505302	0.00804792	Absent	Under-represented
PF01863.8	DUF45	0	0	0	1	1	1	1	0	1	1	1	1	1	0	0	0	0	1	0.505302	0.00804792	Absent	Under-represented
PF02595.6	Gly_kinase	0	0	0	1	1	1	0	1	0	0	0	1	1	1	1	1	1	0	0.505302	0.00804792	Absent	Under-represented
PF00209.9	SNF	0	0	0	1	1	1	3	1	2	3	2	1	1	1	2	0	0	0	0.438524	0.0107442	Absent	Under-represented
PF01431.12	Peptidase_M13	0	0	0	1	1	1	1	0	1	1	1	1	1	0	0	0	0	0	0.653646	0.0208596	Absent	Under-represented
PF02333.6	Phytase	0	0	0	1	1	1	1	0	1	1	1	1	1	0	0	0	0	0	0.653646	0.0208596	Absent	Under-represented
PF03422.6	CBM_6	0	0	0	1	1	1	1	0	1	1	1	1	1	0	0	0	0	0	0.653646	0.0208596	Absent	Under-represented
PF05649.4	Peptidase_M13_N	0	0	0	1	1	1	1	0	1	1	1	1	1	0	0	0	0	0	0.653646	0.0208596	Absent	Under-represented
PF02157.6	Man-6-P_recep	0	0	0	1	1	1	1	0	1	1	0	1	0	0	1	0	0	0	0.785861	0.0471553	Absent	Under-represented
PF04774.6	HABP4_PAI-RBP1	0	0	0	1	1	1	1	0	0	1	0	1	1	0	1	0	0	0	0.785861	0.0471553	Absent	Under-represented
PF04908.6	SH3BGR	0	0	0	1	1	1	1	1	1	1	0	1	0	0	0	0	0	0	0.785861	0.0471553	Absent	Under-represented
PF06325.4	PrmA	0	0	0	1	1	1	1	0	0	1	1	1	1	0	0	0	0	0	0.785861	0.0471553	Absent	Under-represented
PF03604.4	DNA_RNApol_7kD	0	0	0	1	1	1	1	1	1	1	1	1	1	1	1	1	1	1	0.136069	1	Absent	Under-represented
