# Supplementary material for: Diverse Lifestyles and Strategies of Plant Pathogenesis Encoded in the Genomes of Eighteen Dothideomycetes Fungi
Source: PLoS Pathog. 2012 Dec 6;8(12):e1003037. doi: 10.1371/journal.ppat.1003037 (PMC3516569; doi:10.1371/journal.ppat.1003037)
Supplement: Table S20 — Distribution of polyketide synthases across the 18 Dothideomycetes relative to the highly curated set in Cochliobolus heterostrophus set [40] . (XLS) [file ppat.1003037.s029.xls]

## Sheet: results_NRPS_counts turgeon
Organism	# PKS genes	# C. heterostrophus C5 orthologs	PKS1	PKS2	PKS3	PKS4	PKS5	PKS6	PKS7	PKS8	PKS9	PKS10	PKS11	PKS12	PKS13	PKS14	PKS15	PKS16	PKS17	PKS18	PKS19	PKS20	PKS21	PKS22	PKS23	PKS24	PKS25
		Genbank ID:		ABB76806	AAR90258	AAR90259AAR90260	AAR90258	AAR90261	AAR90262	AAR90263	AAR90264	AAR90265	AAR90266	AAR90267	AY495653	AAR90268	AAR90269	AAR90270	AAR90271	AAR90272	AAR90273	AAR90274AAR90262	AAR90275	AAR90276	AAR90277	AAR90278	AAR90279
		JGI Protein ID:			1098212	96868	1103337	1168707	11184456	28817	1104189	96669	1112706	1216295	75987	67271	108173	33896	1105179	34478	81477	1108855	1029307	105287	77059	1209664	1034546
								1229326												(-30478)
Alternaria brassicicola	7	4	-	-	-	-	-	+ x2	-	+	-	-	-	-	-	-	(+)(78)	+ (86)	-	-	-	-	-	-	-	-	-
Baudoinia compniacensis	2	2	-	-	-	-	-	-	-	-	-	-	-	-	-	-	-	-	-	+	-	-	-	-	-	-	-
Cladosporium fulvum	10	3	-	-	-	-	+ (80)	-	-	-	-	-	-	-	-	-	-	-	-	+	+ (79)	-	-	-	-	-	-
Cochliobolus heterostrophus C5	23	23	-	-	+	+	+	+ x2	+	+	+	+	+	+	+ (50)	+	+	+	+	+	+	+	+	+	+	+	+
Cochliobolus heterostrophus C4	25	25	+	+	+	+	+	+ x2	+	+	+	+	+	+	+	+	+	+	+	+	+	+	+	+	+	+	+
Cochliobolus sativus	18	12	-	-	+	-	+	-	-	+	+	-	+	+	-	-	+	-	-	+	+	-	+	-	+	+	-
Dothistroma septosporum	6	1	-	-	-	-	-	-	-	-	-	-	-	-	-	-	-	-	-	+	-	-	-	-	-	-	-
Hysterium pulicare	28	1	-	-	-	-	-	-	-	-	-	-	-	-	-	-	-	-	-	+	-	-	-	-	-	-	-
Leptosphaeria maculans	13	1	-	-	-	-	-	-	-	-	-	-	-	-	-	-	-	-	-	+	-	-	-	-	-	-	-
Mycosphaerella fijiensis	8	2	-	-	-	-	-	-	-	-	-	-	-	-	-	-	-	-	-	+	+	-	-	-	-	-	-
Mycosphaerella graminicola	11	2	-	-	-	-	-	-	-	-	-	-	-	-	-	-	-	-	(+)(88)	+	-	-	-	-	-	-	-
Pyrenophora teres	22	5	-	-	-	-	-	+ x2	-	-	+	-	-	-	-	-	-	-	-	+	+	-	+	-	-	-	-
Pyrenophora tritici-repentis	17	4	-	-	+ (84)	-	-	+ x2	-	-	+	-	-	-	-	-	-	+ (88)	-	+	+	-	+	-	+	-	-
Rhytidhysteron rufulum	34	1	-	-	-	-	-	-	-	-	-	-	-	-	-	-	-	-	-	+	-	-	-	-	-	-	-
Mycosphaerella populorum	11	1	-	-	-	-	-	+ x2 (80)	-	-	-	-	-	-	-	-	-	-	-	+	+	-	-	-	-	-	-
Mycosphaerella populicola	10	2	-	-	-	-	-	+ x2 (80)	-	-	-	-	-	-	-	-	-	-	-	+	+	-	-	-	-	-	-
Setosphaeria turcica	27	12	-	-	-	-	+	+ x2 (80)	-	+	+	+	-	+	-	+	-	+ (86)	-	+	+	-	-	+	+	-	-
Stagonospora nodorum	19	3	-	-	-	-	-	-	-	-	-	-	-	-	+ (86)	+	-	+ (82)	-	+	-	-	-	-	-	-	-
+/- = presence/absence of the C. heterostrophus strain C5 ortholog.
x2 indicates two representatives
cutoff is greater than 90% identity at the amino acid level except where indicated in parentheses
